# Supplementary material for: Iron-catalyzed cross-electrophile coupling of bromostyrenes and chlorosilanes
Source: Royal Society of Chemistry journal article supplement (doi:10.1039/d3qo00372h), 2023-01-01
Supplement: d3qo00372h1.pdf [file d3qo00372h1.pdf]

## **Supporting Information**

# **Iron-Catalyzed Cross-Electrophile Coupling of Bromostyrenes and Chlorosilanes**

Ying Lin, Liang Zou, Renren Bai, Xiang-Yang Ye,\* Tian Xie,\* and Yang Ye\*

*<sup>1</sup>School of Pharmacy, Hangzhou Normal University, Hangzhou, Zhejiang 311121, PR China*

*<sup>2</sup>Key Laboratory of Elemene Class Anti-Cancer Chinese Medicines; Engineering Laboratory of Development and Application of Traditional Chinese Medicines; Collaborative Innovation Center of Traditional Chinese Medicines of Zhejiang Province, Hangzhou Normal University, Hangzhou, Zhejiang 311121, China*

*yangye@hznu.edu.cn*

## **Table of Contents**

|                                                                  |          |
|------------------------------------------------------------------|----------|
| I. Experimental Section .....                                    | S2-S40   |
| Part 1. General Information .....                                | S2       |
| Part 2. Details of Optimization .....                            | S3-S6    |
| Part 3. Coupling of Vinyl Chlorosilanes with Vinyl Halides ..... | S7-S26   |
| Part 4. Coupling of Chlorohydrosilanes with Vinyl Halides .....  | S27-S32  |
| Part 5. Preparation of Alkenyl Bromides .....                    | S33-S35  |
| Part 6. Scale-up Experiments and Synthetic Applications .....    | S36-S37  |
| Part 7. Mechanism Experiments .....                              | S38-S40  |
| II. Spectral Data for New Compounds .....                        | S41-S108 |
| III. References .....                                            | S109     |

## **I. Experimental Section**

### ***Part 1. General Information***

#### **1. Chemicals and Reagents**

All operations were carried out under an atmosphere of nitrogen in a Schlenk line with magnetic stirring. DMF, THF, DMSO, DMA and so on were purchased (Sinopharm Group Co., China) and used directly. Deuterated solvents were used as received ( $\text{CDCl}_3$  and  $\text{DMSO-}d_6$  from Maclin Co., China). Nickel catalysts, iron catalysts, reductive, ligands were purchased from Bidepharm, Aldrich, Energy Chemicals, and TCI. Zinc powder (Aladdin) was activated with hydrochloric acid before use. Procedures for the synthesis of the vinyl halides were synthesized according to the literature procedure.<sup>[1,2]</sup> All of the chlorosilanes were purchased from NY-Silicon (<http://nanyuan-chem.com>), which also could be synthesized according to the literature procedure.<sup>[3,4]</sup> Unless otherwise noted, all other reagents and starting materials were purchased from commercial sources and used without further purification.

#### **2. Physical Method**

Column chromatography was performed using silica gel 300-400 mesh (purchased from Qingdao-Haiyang Co., China) as the solid support. All NMR spectra were recorded on Bruker Avance 500 MHz spectrometer at STP unless otherwise indicated.  $^1\text{H}$  NMR and  $^{13}\text{C}$  NMR chemical shifts are reported in  $\delta$  units, parts per million (ppm) relative to the chemical shift of residual solvent. Reference peaks for chloroform in  $^1\text{H}$  NMR and  $^{13}\text{C}$  NMR spectra were set at 7.26 ppm and 77.16 ppm, respectively. High resolution mass spectra were measured on Bruker MicroTOF II ESI-TOF mass spectrometer. Low resolution mass spectra were measured on Agilent 1260 Infinity II/6125 mass spectrometer. Melting point was recorded on a micro melting point apparatus (X-4, YUHUA Co., Ltd, Gongyi, China).

## Part 2. Details of Optimization

**Table S1.** Screening of Ni catalyst for the reaction of **1a** and **1b**

| Entry | Ni Catalyst                                           | yield% <i>Isolated yield</i> |
|-------|-------------------------------------------------------|------------------------------|
| 1     | Ni(dppf)Cl <sub>2</sub>                               | 75                           |
| 2     | NiCl <sub>2</sub> (PPh <sub>3</sub> ) <sub>2</sub>    | 27                           |
| 3     | Ni(COD) <sub>2</sub>                                  | 29                           |
| 4     | NiBr <sub>2</sub>                                     | 28                           |
| 5     | Ni(OTf) <sub>2</sub>                                  | 60                           |
| 6     | NiF <sub>2</sub>                                      | 58                           |
| 7     | Ni(ClO <sub>4</sub> ) <sub>2</sub> ·6H <sub>2</sub> O | 30                           |
| 8     | NiCl <sub>2</sub>                                     | 40                           |
| 9     | NiI <sub>2</sub>                                      | 38                           |
| 10    | NiBr <sub>2</sub> ·DME                                | 18                           |
| 11    | Ni(acac) <sub>2</sub>                                 | 38                           |
| 12    | Ni(TMHD) <sub>2</sub>                                 | 37                           |
| 13    | NiCl <sub>2</sub> ·DME                                | 30                           |

**Table S2.** Screening of Fe catalyst for the reaction of **1a** and **1b**

| Entry | Fe Catalyst                           | yield% <i>Isolated yield</i> |
|-------|---------------------------------------|------------------------------|
| 1     | Cu(acac) <sub>2</sub>                 | no reaction                  |
| 2     | Co(acac) <sub>2</sub>                 | 8                            |
| 3     | Fe(acac) <sub>3</sub>                 | 76                           |
| 4     | K <sub>3</sub> [Fe(CN) <sub>6</sub> ] | no reaction                  |
| 5     | FeCl <sub>3</sub>                     | 79                           |
| 6     | [Bmim]FeCl <sub>4</sub>               | 83                           |
| 7     | Iron phthalocyanine                   | 18                           |
| 8     | FeF <sub>3</sub>                      | 79                           |

|    |                                                      |             |
|----|------------------------------------------------------|-------------|
| 9  | Fe(OTf) <sub>3</sub>                                 | 70          |
| 10 | FeBr <sub>3</sub>                                    | 52          |
| 11 | Fe(acac) <sub>2</sub>                                | 93          |
| 12 | FeCl <sub>2</sub>                                    | 43          |
| 13 | FeAc                                                 | 50          |
| 14 | Fe(NO <sub>3</sub> ) <sub>3</sub> ·9H <sub>2</sub> O | no reaction |
| 15 | Fe <sub>2</sub> (SO <sub>4</sub> ) <sub>3</sub>      | 62          |
| 16 | Ferric oxalate                                       | no reaction |
| 17 | FeSO <sub>4</sub>                                    | 64          |

**Table S3.** Screening of ligand for the reaction of **1a** and **1b**

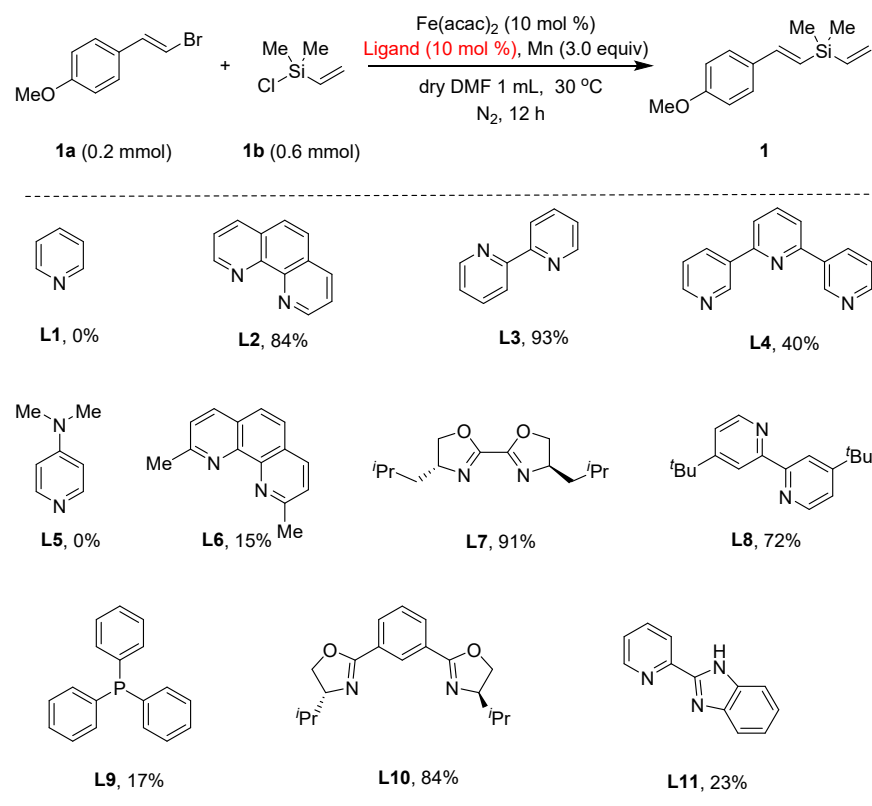



**Table S4.** Screening of reductive for the reaction of **1a** and **1b**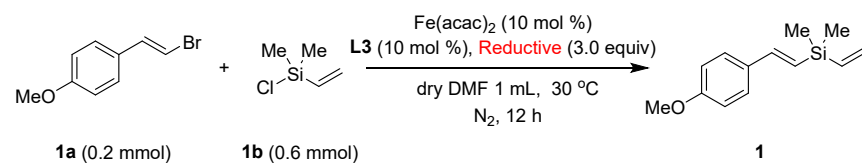

| Entry | Reductive                               | yield% <i>Isolated yield</i> |
|-------|-----------------------------------------|------------------------------|
| 1     | Mn                                      | 93                           |
| 2     | Zn                                      | no reaction                  |
| 3     | TDAE                                    | no reaction                  |
| 4     | B <sub>2</sub> pin <sub>2</sub> + LiOMe | no reaction                  |

**Table S5.** Screening of temperature for the reaction of **1a** and **1b**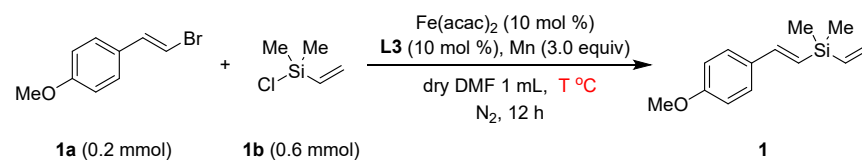

| Entry | Temperature | yield% <i>Isolated yield</i> |
|-------|-------------|------------------------------|
| 1     | 0 °C        | 90                           |
| 2     | 25 °C       | 80                           |
| 3     | 30 °C       | 93                           |
| 4     | 45 °C       | 71                           |

**Table S6.** Screening for the ratio of **1a** and **1b**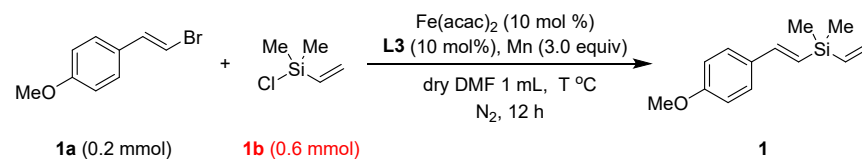

| Entry | Variations            | yield% <i>Isolated yield</i> |
|-------|-----------------------|------------------------------|
| 1     | none                  | 93                           |
| 2     | <b>1b</b> (1.0 equiv) | 41                           |
| 3     | <b>1b</b> (1.5 equiv) | 28                           |
| 4     | <b>1b</b> (2.0 equiv) | 37                           |
| 5     | <b>1b</b> (2.5 equiv) | 70                           |
| 6     | <b>1b</b> (2.7 equiv) | 80                           |
| 7     | <b>1b</b> (2.8 equiv) | 72                           |

**Table S7.** Screening of solvent for the reaction of **1a** and **1b**

| Entry | Solvent                           | yield% <i>Isolated yield</i> |
|-------|-----------------------------------|------------------------------|
| 1     | none                              | 93                           |
| 2     | DMA instead of DMF                | 74                           |
| 3     | DMSO instead of DMF               | 20                           |
| 4     | CH <sub>3</sub> CN instead of DMF | no reaction                  |
| 5     | 1,4-Dioxane instead of DMF        | no reaction                  |

***Ineffective Substrates:***

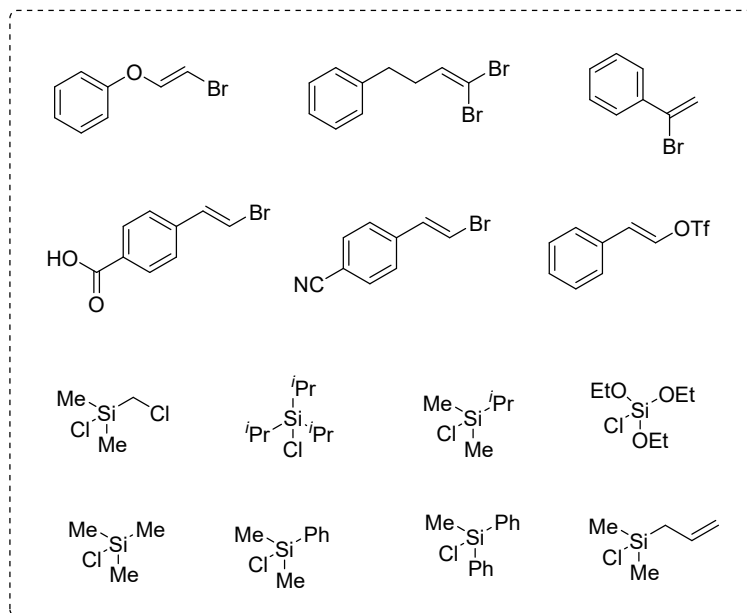

### Part 3. Coupling of Vinyl Chlorosilanes with Vinyl Halides

#### 1. General Procedure

**General procedure for the reaction of vinyl chlorosilanes with vinyl halides (method A):** To a dried Schlenk line was charged with vinyl halides (0.2 mmol, 100 mol%), 2,2'-bipyridine (3.12 mg, 0.02 mmol, 10 mol%), Fe(acac)<sub>2</sub> (5.08 mg, 0.02 mmol, 10 mol%) at 25 °C. The Schlenk line was sealed with an atmosphere of nitrogen. Chlorodimethyl(vinyl)silane (72.39 mg, 0.6 mmol, 300 mol%) was added followed by addition of DMF (1 mL) via syringes. The reaction mixture was allowed to maintain 30 °C and stirred overnight. The reaction mixture was purified by column chromatograph to afford the product as a solid or oil.

#### 2. Experimental Details

##### (E)-(4-Methoxystyryl)dimethyl(vinyl)silane (1)

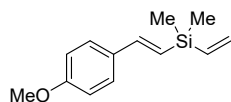

This compound was prepared according to the method A. After purification by column chromatography (SiO<sub>2</sub>: 5% ethyl acetate in petroleum ether), the title compound was isolated in 90% yield (39.30 mg, 0.180 mmol) as a colorless oil. Moreover, when (Z)-alkenyl bromide was used, 57% yield of **1** was obtained.

**<sup>1</sup>H NMR** (500 MHz, CDCl<sub>3</sub>):  $\delta$  7.39–7.35 (m, 2H), 6.87–6.82 (m, 3H), 6.28 (d,  $J$  = 19.2 Hz, 1H), 6.22 (dd,  $J$  = 20.3, 14.6 Hz, 1H), 6.01 (dd,  $J$  = 14.6, 3.8 Hz, 1H), 5.75 (dd,  $J$  = 20.3, 3.8 Hz, 1H), 3.80 (s, 3H), 0.22 (s, 6H).

**<sup>13</sup>C NMR** (126 MHz, CDCl<sub>3</sub>):  $\delta$  159.77, 144.39, 138.64, 132.32, 131.40, 127.81, 124.46, 114.02, 55.41, -2.71.

**HRMS** (ESI)  $m/z$  ([M+Na]<sup>+</sup>) calcd for C<sub>13</sub>H<sub>18</sub>NaOSi: 241.1019. Found: 241.1016.

##### (E)-Dimethyl(styryl)(vinyl)silane (2)

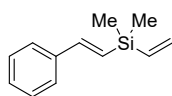

This compound was prepared according to the method A. After purification by column chromatography (SiO<sub>2</sub>: petroleum ether), the title compound was isolated in 72% yield (27.2 mg, 0.144 mmol) as a colorless oil.

**<sup>1</sup>H NMR** (500 MHz, CDCl<sub>3</sub>):  $\delta$  7.44 (d,  $J$  = 7.4 Hz, 2H), 7.32 (t,  $J$  = 7.5 Hz, 2H), 7.25 (t,  $J$  = 7.5 Hz,

1H), 6.90 (d,  $J = 19.1$  Hz, 1H), 6.45 (d,  $J = 19.1$  Hz, 1H), 6.22 (dd,  $J = 20.3, 14.6$  Hz, 1H), 6.02 (dd,  $J = 14.6, 3.8$  Hz, 1H), 5.76 (dd,  $J = 20.3, 3.8$  Hz, 1H), 0.23 (s, 6H).

**$^{13}\text{C}$  NMR** (126 MHz,  $\text{CDCl}_3$ ):  $\delta$  144.86, 138.29, 132.42, 128.56, 128.12, 127.29, 126.47, -2.88.

**Methyl (*E*)-4-(2-(dimethyl(vinyl)silyl)vinyl)benzoate (3)**

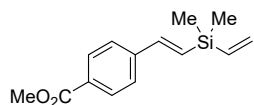

This compound was prepared according to the method A. After purification by column chromatography ( $\text{SiO}_2$ : 5% ethyl acetate in petroleum ether), the title compound was isolated in 81% yield (39.90 mg, 0.162 mmol) as a colorless oil.

**$^1\text{H}$  NMR** (500 MHz,  $\text{CDCl}_3$ ):  $\delta$  8.01–7.98 (m, 2H), 7.51–7.47 (m, 2H), 6.93 (d,  $J = 19.1$  Hz, 1H), 6.60 (d,  $J = 19.1$  Hz, 1H), 6.21 (dd,  $J = 20.3, 14.6$  Hz, 1H), 6.04 (dd,  $J = 14.6, 3.7$  Hz, 1H), 5.77 (dd,  $J = 20.3, 3.8$  Hz, 1H), 3.91 (s, 3H), 0.25 (s, 6H).

**$^{13}\text{C}$  NMR** (126 MHz,  $\text{CDCl}_3$ ):  $\delta$  167.02, 143.79, 142.57, 137.84, 132.86, 131.09, 130.02, 129.52, 126.44, 52.18, -2.93.

**(*E*)-Dimethyl(4-(methylsulfonyl)styryl)(vinyl)silane (4)**

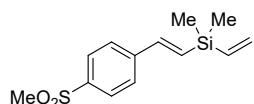

This compound was prepared according to the method A. After purification by column chromatography ( $\text{SiO}_2$ : 5% ethyl acetate in petroleum ether), the title compound was isolated in 85% yield (45.30 mg, 0.170 mmol) as a yellow oil.

**$^1\text{H}$  NMR** (500 MHz,  $\text{CDCl}_3$ ):  $\delta$  7.91–7.88 (m, 2H), 7.61–7.58 (m, 2H), 6.93 (d,  $J = 19.2$  Hz, 1H), 6.66 (d,  $J = 19.1$  Hz, 1H), 6.21 (dd,  $J = 20.2, 14.6$  Hz, 1H), 6.05 (dd,  $J = 14.6, 3.7$  Hz, 1H), 5.77 (dd,  $J = 20.2, 3.7$  Hz, 1H), 3.05 (s, 3H), 0.26 (s, 6H).

**$^{13}\text{C}$  NMR** (126 MHz,  $\text{CDCl}_3$ ):  $\delta$  143.43, 142.64, 139.40, 137.40, 133.14, 133.04, 127.76, 127.15, 44.61, -3.10.

**HRMS** (ESI)  $m/z$  ( $[\text{M}+\text{H}]^+$ ) calcd for  $\text{C}_{13}\text{H}_{19}\text{O}_2\text{SSi}$ : 267.0870. Found: 267.0870.

**(*E*)-Dimethyl(4-(trifluoromethyl)styryl)(vinyl)silane (5)**

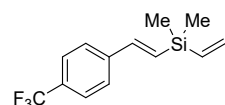

This compound was prepared according to the method A. After purification by column chromatography ( $\text{SiO}_2$ : petroleum ether), the title compound was isolated in 54% yield (27.69 mg, 0.108 mmol) as a colorless oil.

**<sup>1</sup>H NMR** (500 MHz, CDCl<sub>3</sub>):  $\delta$  7.57 (d,  $J$  = 8.2 Hz, 2H), 7.52 (d,  $J$  = 8.2 Hz, 2H), 6.92 (d,  $J$  = 19.1 Hz, 1H), 6.58 (d,  $J$  = 19.2 Hz, 1H), 6.26–6.17 (m, 1H), 6.04 (dd,  $J$  = 14.6, 3.7 Hz, 1H), 5.77 (dd,  $J$  = 20.2, 3.8 Hz, 1H), 0.25 (s, 6H).

**<sup>13</sup>C NMR** (126 MHz, CDCl<sub>3</sub>):  $\delta$  143.23, 137.70, 132.84, 130.95, 126.61, 125.58, 125.54, 125.50, 125.46, -3.03.

**<sup>19</sup>F NMR** (471 MHz, CDCl<sub>3</sub>):  $\delta$  -62.46.

**HRMS** (ESI)  $m/z$  ([M+Na]<sup>+</sup>) calcd for C<sub>13</sub>H<sub>15</sub>F<sub>3</sub>NaSi: 279.0787. Found: 279.0913.

**(*E*)-Dimethyl(4-(trifluoromethoxy)styryl)(vinyl)silane (6)**

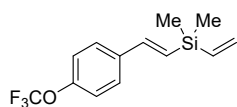

This compound was prepared according to the method A. After purification by column chromatography (SiO<sub>2</sub>: petroleum ether), the title compound was isolated in 73% yield (39.76 mg, 0.146 mmol) as a colorless oil.

**<sup>1</sup>H NMR** (500 MHz, CDCl<sub>3</sub>):  $\delta$  7.46–7.43 (m, 2H), 7.18–7.15 (m, 2H), 6.87 (d,  $J$  = 19.1 Hz, 1H), 6.44 (d,  $J$  = 19.1 Hz, 1H), 6.21 (dd,  $J$  = 20.3, 14.6 Hz, 1H), 6.03 (dd,  $J$  = 14.6, 3.7 Hz, 1H), 5.76 (dd,  $J$  = 20.3, 3.8 Hz, 1H), 0.24 (s, 6H).

**<sup>13</sup>C NMR** (126 MHz, CDCl<sub>3</sub>):  $\delta$  149.02, 143.29, 138.05, 137.14, 132.75, 130.48, 128.91, 127.81, 121.12, -2.88.

**<sup>19</sup>F NMR** (471 MHz, CDCl<sub>3</sub>):  $\delta$  -57.86.

**(*E*)-(4-Fluorostyryl)dimethyl(vinyl)silane (7)**

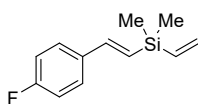

This compound was prepared according to the method A. After purification by column chromatography (SiO<sub>2</sub>: petroleum ether), the title compound was isolated in 58% yield (23.80 mg, 0.116 mmol) as a colorless oil.

**<sup>1</sup>H NMR** (500 MHz, CDCl<sub>3</sub>):  $\delta$  7.44–7.36 (m, 2H), 7.04–6.97 (m, 2H), 6.85 (d,  $J$  = 19.2 Hz, 1H), 6.35 (d,  $J$  = 19.2 Hz, 1H), 6.21 (dd,  $J$  = 20.3, 14.6 Hz, 1H), 6.02 (dd,  $J$  = 14.6, 3.8 Hz, 1H), 5.75 (dd,  $J$  = 20.3, 3.8 Hz, 1H), 0.23 (s, 6H).

**<sup>13</sup>C NMR** (126 MHz, CDCl<sub>3</sub>):  $\delta$  163.68 (d,  $J$  = 245.7 Hz), 143.55, 138.16, 134.56, 132.50, 128.05 (d,  $J$  = 7.6 Hz), 127.02, 115.52 (d,  $J$  = 21.4 Hz), -2.91.

**<sup>19</sup>F NMR** (471 MHz, CDCl<sub>3</sub>):  $\delta$  -113.90.

**(E)-(4-Chlorostyryl)dimethyl(vinyl)silane (8)**

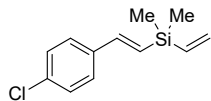

This compound was prepared according to the method A. After purification by column chromatography (SiO<sub>2</sub>: 5% ethyl acetate in petroleum ether), the title compound was isolated in 51% yield (22.72 mg, 0.152 mmol) as a colorless oil.

**<sup>1</sup>H NMR** (500 MHz, CDCl<sub>3</sub>):  $\delta$  7.23 (d,  $J$  = 8.4 Hz, 2H), 7.16 (d,  $J$  = 8.5 Hz, 2H), 6.71 (d,  $J$  = 19.1 Hz, 1H), 6.30 (d,  $J$  = 19.2 Hz, 1H), 6.08 (dd,  $J$  = 20.2, 14.6 Hz, 1H), 5.90 (dd,  $J$  = 14.6, 3.8 Hz, 1H), 5.63 (dd,  $J$  = 20.2, 4.4 Hz, 1H), 0.10 (s, 6H).

**<sup>13</sup>C NMR** (126 MHz, CDCl<sub>3</sub>):  $\delta$  143.55, 138.10, 136.88, 133.83, 132.69, 128.80, 128.37, 127.77, - 2.86.

**(E)-(4-Bromostyryl)dimethyl(vinyl)silane (9)**

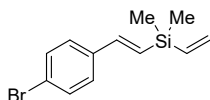

This compound was prepared according to the method A. After purification by column chromatography (SiO<sub>2</sub>: petroleum ether), the title compound was isolated in 69% yield (36.88 mg, 0.138 mmol) as a colorless oil.

**<sup>1</sup>H NMR** (500 MHz, CDCl<sub>3</sub>):  $\delta$  7.44 (d,  $J$  = 8.5 Hz, 2H), 7.29 (d,  $J$  = 8.5 Hz, 2H), 6.84 (s, 1H), 6.44 (d,  $J$  = 19.1 Hz, 1H), 6.20 (dd,  $J$  = 20.2, 14.6 Hz, 1H), 6.02 (dd,  $J$  = 14.6, 3.8 Hz, 1H), 5.75 (dd,  $J$  = 20.3, 3.8 Hz, 1H), 0.23 (s, 6H).

**<sup>13</sup>C NMR** (126 MHz, CDCl<sub>3</sub>):  $\delta$  143.50, 137.97, 137.22, 132.62, 131.66, 128.48, 127.99, 121.95, - 2.97.

**(E)-(4-Iodostyryl)dimethyl(vinyl)silane (10)**

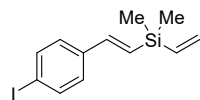

This compound was prepared according to the method A. After purification by column chromatography (SiO<sub>2</sub>: 5% ethyl acetate in petroleum ether), the title compound was isolated in 52% yield (32.68 mg, 0.104 mmol) as a pale yellow oil.

**<sup>1</sup>H NMR** (500 MHz, CDCl<sub>3</sub>):  $\delta$  7.64 (d,  $J$  = 8.5 Hz, 2H), 7.16 (d,  $J$  = 8.4 Hz, 2H), 6.81 (d,  $J$  = 19.2 Hz, 1H), 6.46 (d,  $J$  = 19.1 Hz, 1H), 6.20 (dd,  $J$  = 20.3, 14.6 Hz, 1H), 6.02 (dd,  $J$  = 14.6, 3.8 Hz, 1H), 5.75 (dd,  $J$  = 20.2, 3.8 Hz, 1H), 0.23 (d,  $J$  = 3.6 Hz, 6H).

**<sup>13</sup>C NMR** (126 MHz, CDCl<sub>3</sub>):  $\delta$  143.61, 137.94, 137.78, 137.62, 132.63, 128.62, 128.21, 93.59, - 2.97.

**HRMS** (ESI)  $m/z$  ( $[M+H]^+$ ) calcd for  $C_{12}H_{16}Si$ : 315.0060. Found: 315.1574.

**(E)-(2,6-Difluorostyryl)dimethyl(vinyl)silane (11)**

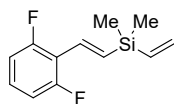

This compound was prepared according to the method A. After purification by column chromatography ( $SiO_2$ : petroleum ether), the title compound was isolated in 56% yield (25.13 mg, 0.112 mmol) as a colorless oil.

**$^1H$  NMR** (500 MHz,  $CDCl_3$ ):  $\delta$  7.18–7.10 (m, 1H), 6.92 (d,  $J$  = 19.8 Hz, 1H), 6.86 (t,  $J$  = 8.4 Hz, 2H), 6.76 (d,  $J$  = 19.8 Hz, 1H), 6.22 (dd,  $J$  = 20.2, 14.6 Hz, 1H), 6.03 (dd,  $J$  = 14.6, 3.8 Hz, 1H), 5.77 (dd,  $J$  = 20.3, 3.8 Hz, 1H), 0.24 (s, 6H).

**$^{13}C$  NMR** (126 MHz,  $CDCl_3$ ):  $\delta$  162.15 (d,  $J$  = 7.6 Hz), 160.14 (d,  $J$  = 7.6 Hz), 137.80, 136.77 (t,  $J$  = 6.3 Hz), 132.73, 130.84 (t,  $J$  = 2.5 Hz), 128.44 (t,  $J$  = 10.1 Hz), 111.57 (dd,  $J$  = 20.6, 5.9 Hz), -3.11 (s).

**$^{19}F$  NMR** (471 MHz,  $CDCl_3$ ):  $\delta$  -112.62.

**HRMS** (ESI)  $m/z$  ( $[M+H]^+$ ) calcd for  $C_{12}H_{15}F_2Si$ : 225.0906. Found: 225.0350.

**(E)-4-(2-(Dimethyl(vinyl)silyl)vinyl)-N,N-dimethylaniline (12)**

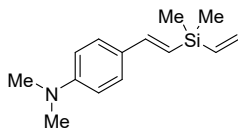

This compound was prepared according to the method A. After purification by column chromatography ( $SiO_2$ : 5% ethyl acetate in petroleum ether), the title compound was isolated in 34% yield (49.68 mg, 0.068 mmol) as a colorless oil.

**$^1H$  NMR** (500 MHz,  $CDCl_3$ ):  $\delta$  7.15–7.11 (m, 2H), 6.61 (d,  $J$  = 19.1 Hz, 1H), 6.48–6.45 (m, 2H), 6.05–5.94 (m, 2H), 5.78 (dd,  $J$  = 14.6, 3.9 Hz, 1H), 5.53 (dd,  $J$  = 20.3, 3.9 Hz, 1H), 2.75 (s, 6H), -0.00 (s, 6H).

**$^{13}C$  NMR** (126 MHz,  $CDCl_3$ ):  $\delta$  150.50, 144.85, 138.97, 131.91, 127.52, 127.05, 121.29, 112.23, 40.48, -2.71.

**HRMS** (ESI)  $m/z$  ( $[M+H]^+$ ) calcd for  $C_{14}H_{22}NSi$ : 232.1516. Found: 232.1531.

**(E)-Dimethyl(4-(4,4,5,5-tetramethyl-1,3,2-dioxaborolan-2-yl)styryl)(vinyl)silane (13)**

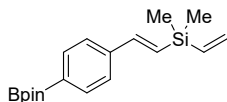

This compound was prepared according to the method A. After purification by column chromatography ( $SiO_2$ : 5% ethyl acetate in petroleum ether), the title compound was isolated in 72% yield (45.3 mg, 0.144 mmol) as a white solid.

**<sup>1</sup>H NMR** (500 MHz, CDCl<sub>3</sub>): δ 7.77 (d, *J* = 8.0 Hz, 2H), 7.46–7.42 (m, 2H), 6.92 (d, *J* = 19.1 Hz, 1H), 6.53 (d, *J* = 19.1 Hz, 1H), 6.22 (dd, *J* = 20.3, 14.6 Hz, 1H), 6.02 (dd, *J* = 14.6, 3.8 Hz, 1H), 5.76 (dd, *J* = 20.3, 3.8 Hz, 1H), 1.35 (s, 12H), 0.24 (s, 6H).

**<sup>13</sup>C NMR** (126 MHz, CDCl<sub>3</sub>): δ 144.81, 140.85, 138.16, 135.06, 132.49, 128.69, 125.77, 83.82, 24.92, -2.93.

**<sup>11</sup>B NMR** (161 MHz, CDCl<sub>3</sub>): δ -62.12.

**HRMS** (ESI) *m/z* ([*M*+*H*]<sup>+</sup>) calcd for C<sub>18</sub>H<sub>28</sub>BO<sub>2</sub>Si: 315.1946. Found: 315.1939.

**M.p.:** 86-87 °C.

**(*E*)-Dimethyl(4-methylstyryl)(vinyl)silane (14)**

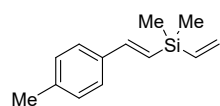

This compound was prepared according to the method A. After purification by column chromatography (SiO<sub>2</sub>: petroleum ether), the title compound was isolated in 75% yield (30.36 mg, 0.150 mmol) as a colorless oil.

**<sup>1</sup>H NMR** (500 MHz, CDCl<sub>3</sub>): δ 7.33 (d, *J* = 8.2 Hz, 2H), 7.13 (d, *J* = 7.9 Hz, 2H), 6.87 (d, *J* = 19.1 Hz, 1H), 6.38 (d, *J* = 19.1 Hz, 1H), 6.22 (dd, *J* = 20.3, 14.6 Hz, 1H), 6.01 (dd, *J* = 14.6, 3.8 Hz, 1H), 5.75 (dd, *J* = 20.3, 3.8 Hz, 1H), 2.33 (s, 3H), 0.22 (s, 6H).

**<sup>13</sup>C NMR** (126 MHz, CDCl<sub>3</sub>): δ 144.77, 138.46, 138.00, 135.64, 132.29, 129.26, 126.40, 125.87, 21.28, -2.85.

**HRMS** (ESI) *m/z* ([*M*+*K*]<sup>+</sup>) calcd for C<sub>13</sub>H<sub>18</sub>KSi: 241.0809. Found: 241.0805.

**(*E*)-(2-Methoxystyryl)dimethyl(vinyl)silane (15)**

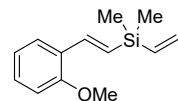

This compound was prepared according to the method A. After purification by column chromatography (SiO<sub>2</sub>: petroleum ether), the title compound was isolated in 93% yield (40.62 mg, 0.186 mmol) as a pale yellow oil.

**<sup>1</sup>H NMR** (500 MHz, CDCl<sub>3</sub>): δ 7.53 (dd, *J* = 7.7, 1.8 Hz, 1H), 7.32 (d, *J* = 19.4 Hz, 1H), 7.25–7.19 (m, 1H), 6.95–6.90 (m, 1H), 6.85 (dd, *J* = 8.2, 1.1 Hz, 1H), 6.43 (d, *J* = 19.3 Hz, 1H), 6.23 (dd, *J* = 20.3, 14.6 Hz, 1H), 6.00 (dd, *J* = 14.6, 3.8 Hz, 1H), 5.76 (dd, *J* = 20.3, 3.8 Hz, 1H), 3.83 (s, 3H), 0.24 (s, 6H).

**<sup>13</sup>C NMR** (126 MHz, CDCl<sub>3</sub>): δ 156.70, 139.12, 138.60, 132.18, 129.15, 127.58, 127.43, 126.32, 120.62, 110.94, 55.50, -2.80.



**HRMS** (ESI)  $m/z$  ( $[M+H]^+$ ) calcd for  $C_{13}H_{19}OSi$ : 219.1200. Found: 219.1193.

**(E)-(3-Methoxystyryl)dimethyl(vinyl)silane (16)**

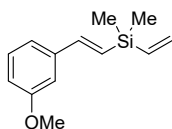

This compound was prepared according to the method A. After purification by column chromatography ( $SiO_2$ : 5% ethyl acetate in petroleum ether), the title compound was isolated in 93% yield (40.62 mg, 0.186 mmol) as a colorless oil.

**$^1H$  NMR** (500 MHz,  $CDCl_3$ ):  $\delta$  7.23 (d,  $J$  = 7.8 Hz, 1H), 7.03 (d,  $J$  = 7.6 Hz, 1H), 6.98 (t,  $J$  = 2.1 Hz, 1H), 6.87 (d,  $J$  = 19.1 Hz, 1H), 6.81 (dd,  $J$  = 8.2, 2.7 Hz, 1H), 6.44 (d,  $J$  = 19.1 Hz, 1H), 6.22 (dd,  $J$  = 20.3, 14.6 Hz, 1H), 6.02 (dd,  $J$  = 14.6, 3.8 Hz, 1H), 5.76 (dd,  $J$  = 20.3, 3.8 Hz, 1H), 3.82 (s, 3H), 0.24 (s, 6H).

**$^{13}C$  NMR** (126 MHz,  $CDCl_3$ ):  $\delta$  159.85, 144.66, 139.74, 138.19, 132.42, 129.48, 127.62, 119.21, 114.02, 111.36, 55.24, -2.94.

**HRMS** (ESI)  $m/z$  ( $[M+H]^+$ ) calcd for  $C_{13}H_{19}OSi$ : 219.1200. Found: 219.1193.

**(E)-(3,4-Dimethoxystyryl)dimethyl(vinyl)silane (17)**

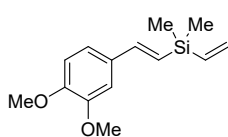

This compound was prepared according to the method A. After purification by column chromatography ( $SiO_2$ : 5% ethyl acetate in petroleum ether), the title compound was isolated in 91% yield (45.21 mg, 0.182 mmol) as a colorless oil.

**$^1H$  NMR** (500 MHz,  $CDCl_3$ ):  $\delta$  7.02 (d,  $J$  = 1.9 Hz, 1H), 6.97 (dd,  $J$  = 8.3, 2.0 Hz, 1H), 6.86–6.81 (m, 2H), 6.28 (d,  $J$  = 19.1 Hz, 1H), 6.26–6.18 (m, 1H), 6.02 (dd,  $J$  = 14.6, 3.8 Hz, 1H), 5.76 (dd,  $J$  = 20.2, 3.8 Hz, 1H), 3.92 (s, 3H), 3.89 (s, 3H), 0.23 (s, 6H).

**$^{13}C$  NMR** (126 MHz,  $CDCl_3$ ):  $\delta$  149.29, 149.07, 144.49, 138.47, 132.30, 131.55, 124.67, 119.94, 110.97, 108.55, 55.96, 55.84, -2.82.

**HRMS** (ESI)  $m/z$  ( $[M+Na]^+$ ) calcd for  $C_{14}H_{20}NaO_2Si$ : 271.1125. Found: 271.1127.

**(E)-Dimethyl(3,4,5-trimethoxystyryl)(vinyl)silane (18)**

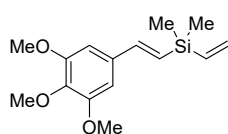

This compound was prepared from (E)-5-(2-iodovinyl)-1,2,3-trimethoxybenzene (64.03 mg, 0.2 mmol) according to the method A. After purification by column chromatography ( $SiO_2$ : 15% ethyl acetate in

petroleum ether), the title compound was isolated in 87% yield (48.45 mg, 0.174 mmol) as a colorless oil. Moreover, when (*E*)-alkenyl bromide was used, 80% yield of **18** was obtained.

**<sup>1</sup>H NMR** (500 MHz, CDCl<sub>3</sub>): δ 6.82 (d, *J* = 19.0 Hz, 1H), 6.68 (s, 2H), 6.35 (d, *J* = 19.0 Hz, 1H), 6.22 (dd, *J* = 20.3, 14.6 Hz, 1H), 6.03 (dd, *J* = 14.6, 3.8 Hz, 1H), 5.77 (dd, *J* = 20.3, 3.8 Hz, 1H), 3.89 (s, 6H), 3.85 (s, 3H), 0.24 (s, 6H).

**<sup>13</sup>C NMR** (126 MHz, CDCl<sub>3</sub>): δ 153.33, 144.61, 138.30, 138.20, 134.01, 132.47, 126.55, 103.46, 60.95, 56.08, -2.88.

**HRMS** (ESI) *m/z* ([*M*+Na]<sup>+</sup>) calcd for C<sub>15</sub>H<sub>22</sub>NaO<sub>3</sub>Si: 301.1230. Found: 301.1270.

**(*E*)-8-(2-(Dimethyl(vinyl)silyl)vinyl)quinoline (19)**

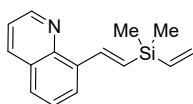

This compound was prepared according to the method A. After purification by column chromatography (SiO<sub>2</sub>: 10% ethyl acetate in petroleum ether), the title compound was isolated in 89% yield (42.61 mg, 0.178 mmol) as a yellow oil.

**<sup>1</sup>H NMR** (500 MHz, CDCl<sub>3</sub>): δ 8.95 (dd, *J* = 4.2, 1.8 Hz, 1H), 8.33 (d, *J* = 19.5 Hz, 1H), 8.12 (dd, *J* = 8.3, 1.8 Hz, 1H), 7.99 (dd, *J* = 7.3, 1.4 Hz, 1H), 7.74 (dd, *J* = 8.2, 1.4 Hz, 1H), 7.53 (t, *J* = 7.6 Hz, 1H), 7.40 (dd, *J* = 8.2, 4.1 Hz, 1H), 6.73 (d, *J* = 19.4 Hz, 1H), 6.31 (dd, *J* = 20.3, 14.6 Hz, 1H), 6.04 (dd, *J* = 14.6, 3.8 Hz, 1H), 5.81 (dd, *J* = 20.3, 3.8 Hz, 1H), 0.32 (s, 6H).

**<sup>13</sup>C NMR** (126 MHz, CDCl<sub>3</sub>): δ 149.67, 145.64, 140.50, 138.55, 136.70, 136.16, 132.28, 129.87, 128.42, 127.80, 126.35, 125.54, 121.05, -2.78.

**HRMS** (ESI) *m/z* ([*M*+H]<sup>+</sup>) calcd for C<sub>15</sub>H<sub>18</sub>NSi: 240.1203. Found: 240.1209.

***tert*-Butyl (*E*)-4-(2-(dimethyl(vinyl)silyl)vinyl)-1*H*-indole-1-carboxylate (20)**

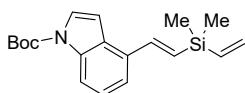

This compound was prepared according to the method A. After purification by column chromatography (SiO<sub>2</sub>: 5% ethyl acetate in petroleum ether), the title compound was isolated in 90% yield (59.00 mg, 0.180 mmol) as a yellow oil.

**<sup>1</sup>H NMR** (500 MHz, CDCl<sub>3</sub>): δ 8.07 (d, *J* = 8.2 Hz, 1H), 7.62 (d, *J* = 3.8 Hz, 1H), 7.44 (d, *J* = 7.6 Hz, 1H), 7.29 (d, *J* = 6.9 Hz, 1H), 7.27–7.25 (m, 1H), 6.80 (dd, *J* = 3.8, 0.8 Hz, 1H), 6.58 (d, *J* = 19.1 Hz, 1H), 6.26 (dd, *J* = 20.3, 14.6 Hz, 1H), 6.04 (dd, *J* = 14.6, 3.8 Hz, 1H), 5.79 (dd, *J* = 20.3, 3.8 Hz, 1H), 1.67 (s, 9H), 0.27 (s, 6H).

**<sup>13</sup>C NMR** (126 MHz, CDCl<sub>3</sub>):  $\delta$  149.80, 141.74, 138.31, 135.64, 132.50, 130.97, 129.03, 128.92, 126.08, 124.33, 119.36, 114.74, 105.29, 83.81, 28.25, -2.82.

**HRMS** (ESI)  $m/z$  ( $[M+H]^+$ ) calcd for C<sub>19</sub>H<sub>26</sub>NO<sub>2</sub>Si: 328.1727. Found: 328.1754.

**(E)-(2-(Benzofuran-2-yl)vinyl)dimethyl(vinyl)silane (21)**

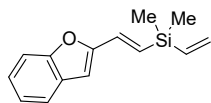

This compound was prepared according to the method A. After purification by column chromatography (SiO<sub>2</sub>: 5% ethyl acetate in petroleum ether), the title compound was isolated in 51% yield (23.20 mg, 0.102 mmol) as a colorless oil.

**<sup>1</sup>H NMR** (500 MHz, CDCl<sub>3</sub>):  $\delta$  7.52 (dd,  $J$  = 7.6, 1.3 Hz, 1H), 7.46–7.42 (m, 1H), 7.28–7.24 (m, 1H), 7.18 (td,  $J$  = 7.5, 1.0 Hz, 1H), 6.81 (d,  $J$  = 19.1 Hz, 1H), 6.67 (d,  $J$  = 19.0 Hz, 1H), 6.59 (d,  $J$  = 6.1 Hz, 1H), 6.22 (dd,  $J$  = 20.3, 14.6 Hz, 1H), 6.06 (d,  $J$  = 3.8 Hz, 1H), 5.78 (dd,  $J$  = 20.2, 3.8 Hz, 1H), 0.25 (s, 6H).

**<sup>13</sup>C NMR** (126 MHz, CDCl<sub>3</sub>):  $\delta$  155.55, 155.01, 137.74, 132.94, 132.49, 130.11, 129.05, 124.92, 122.95, 121.34, 111.17, 104.96, -2.94.

**HRMS** (ESI)  $m/z$  ( $[M+H]^+$ ) calcd for C<sub>14</sub>H<sub>17</sub>OSi: 229.1043. Found: 229.1041.

**(E)-(2-(Benzo[b]thiophen-2-yl)vinyl)dimethyl(vinyl)silane (22)**

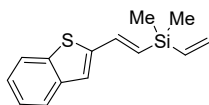

This compound was prepared according to the method A. After purification by column chromatography (SiO<sub>2</sub>: petroleum ether), the title compound was isolated in 69% yield (33.73 mg, 0.138 mmol) as a colorless oil.

**<sup>1</sup>H NMR** (500 MHz, CDCl<sub>3</sub>):  $\delta$  7.80–7.75 (m, 1H), 7.72–7.67 (m, 1H), 7.34–7.27 (m, 2H), 7.17 (s, 1H), 7.08 (d,  $J$  = 18.7 Hz, 1H), 6.31 (d,  $J$  = 18.7 Hz, 1H), 6.22 (dd,  $J$  = 20.3, 14.6 Hz, 1H), 6.05 (dd,  $J$  = 14.6, 3.8 Hz, 1H), 5.79 (dd,  $J$  = 20.3, 3.7 Hz, 1H), 0.26 (s, 6H).

**<sup>13</sup>C NMR** (126 MHz, CDCl<sub>3</sub>):  $\delta$  145.14, 140.22, 139.16, 137.95, 137.75, 132.81, 130.68, 124.86, 124.43, 123.82, 122.94, 122.37, -2.96.

**(E)-Dimethyl(2-(thiophen-2-yl)vinyl)(vinyl)silane (23)**

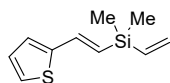

This compound was prepared according to the method A. After purification by column chromatography (SiO<sub>2</sub>: petroleum ether), the title compound was isolated in 50% yield (19.50 mg, 0.100 mmol) as a colorless oil.

**<sup>1</sup>H NMR** (500 MHz, CDCl<sub>3</sub>):  $\delta$  7.17 (dt,  $J$  = 5.0, 1.1 Hz, 1H), 7.01–6.91 (m, 3H), 6.25–6.13 (m, 2H), 6.01 (dd,  $J$  = 14.6, 3.8 Hz, 1H), 5.75 (dd,  $J$  = 20.2, 3.8 Hz, 1H), 0.21 (s, 6H).

**<sup>13</sup>C NMR** (126 MHz, CDCl<sub>3</sub>):  $\delta$  145.18, 138.02, 137.35, 132.56, 127.49, 127.00, 125.82, 124.97, -2.91.

**HRMS** (ESI)  $m/z$  ( $[M+H]^+$ ) calcd for C<sub>10</sub>H<sub>15</sub>SSi: 195.0658. Found: 195.0993.

**(*E*)-4-(2-(Dimethyl(vinyl)silyl)vinyl)pyridine (24)**

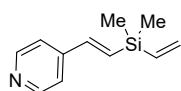

This compound was prepared according to the method A. After purification by column chromatography (SiO<sub>2</sub>: petroleum ether), the title compound was isolated in 98% yield (37.1 mg, 0.196 mmol) as a pale yellow oil.

**<sup>1</sup>H NMR** (500 MHz, CDCl<sub>3</sub>):  $\delta$  7.65 (d,  $J$  = 8.4 Hz, 2H), 7.17 (d,  $J$  = 8.4 Hz, 2H), 6.81 (d,  $J$  = 19.1 Hz, 1H), 6.46 (d,  $J$  = 19.1 Hz, 1H), 6.21 (dd,  $J$  = 20.3, 14.7 Hz, 1H), 6.03 (dd,  $J$  = 14.6, 3.8 Hz, 1H), 5.76 (dd,  $J$  = 20.3, 3.8 Hz, 1H), 0.23 (s, 6H).

**<sup>13</sup>C NMR** (126 MHz, CDCl<sub>3</sub>):  $\delta$  143.71, 138.05, 137.89 (d,  $J$  = 20.2 Hz), 132.73, 128.73, 128.31, 93.68, -2.87.

**HRMS** (ESI)  $m/z$  ( $[M+Na]^+$ ) calcd for C<sub>11</sub>H<sub>15</sub>NNaSi: 212.0866. Found: 212.1181.

**(*E*)-5-(2-(Dimethyl(vinyl)silyl)vinyl)-2-methoxypyridine (25)**

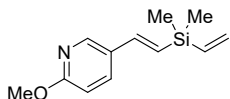

This compound was prepared according to the method A. After purification by column chromatography (SiO<sub>2</sub>: 5% ethyl acetate in petroleum ether), the title compound was isolated in 90% yield (39.48 mg, 0.180 mmol) as a colorless oil.

**<sup>1</sup>H NMR** (500 MHz, CDCl<sub>3</sub>):  $\delta$  8.13 (d,  $J$  = 2.5 Hz, 1H), 7.73 (dd,  $J$  = 8.6, 2.5 Hz, 1H), 6.82 (d,  $J$  = 19.1 Hz, 1H), 6.71 (d,  $J$  = 8.6 Hz, 1H), 6.32 (d,  $J$  = 19.1 Hz, 1H), 6.21 (dd,  $J$  = 20.3, 14.6 Hz, 1H), 6.02 (dd,  $J$  = 14.6, 3.8 Hz, 1H), 5.75 (dd,  $J$  = 20.3, 3.8 Hz, 1H), 3.94 (s, 3H), 0.23 (s, 6H).

**<sup>13</sup>C NMR** (126 MHz, CDCl<sub>3</sub>):  $\delta$  163.97, 146.10, 140.90, 138.12, 135.41, 132.53, 127.61, 126.53, 110.93, 53.60, -2.92.

**HRMS** (ESI)  $m/z$  ( $[M+H]^+$ ) calcd for C<sub>12</sub>H<sub>18</sub>NOSi: 220.1152. Found: 220.1159.

**(E)-Dimethyl(2-(naphthalen-2-yl)vinyl)(vinyl)silane (26)**

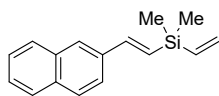

This compound was prepared according to the method A. After purification by column chromatography (SiO<sub>2</sub>: petroleum ether), the title compound was isolated in 98% yield (46.73 mg, 0.196 mmol) as a colorless oil.

**<sup>1</sup>H NMR** (500 MHz, CDCl<sub>3</sub>):  $\delta$  7.82 (dd,  $J$  = 8.3, 2.0 Hz, 2H), 7.80 (d,  $J$  = 4.7 Hz, 2H), 7.69 (dd,  $J$  = 8.5, 1.8 Hz, 1H), 7.46 (tt,  $J$  = 6.9, 5.1 Hz, 2H), 7.09 (d,  $J$  = 19.1 Hz, 1H), 6.60 (d,  $J$  = 19.1 Hz, 1H), 6.27 (dd,  $J$  = 20.3, 14.6 Hz, 1H), 6.06 (dd,  $J$  = 14.6, 3.8 Hz, 1H), 5.81 (dd,  $J$  = 20.3, 3.8 Hz, 1H), 0.29 (s, 6H).

**<sup>13</sup>C NMR** (126 MHz, CDCl<sub>3</sub>):  $\delta$  144.87, 138.28, 135.75, 133.63, 133.38, 132.49, 128.24, 128.18, 127.79, 127.71, 126.81, 126.26, 126.05, 123.37, -2.85.

**(E)-4-(4-(2-(Dimethyl(vinyl)silyl)vinyl)phenyl)morpholine (27).**

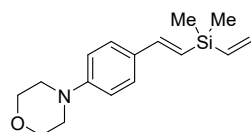

This compound was prepared according to the method A. After purification by column chromatography (SiO<sub>2</sub>: petroleum ether), the title compound was isolated in 54% yield (29.53 mg, 0.108 mmol) as a yellow oil.

**<sup>1</sup>H NMR** (500 MHz, CDCl<sub>3</sub>):  $\delta$  7.38–7.35 (m, 2H), 6.88–6.85 (m, 2H), 6.81 (s, 1H), 6.27 (d,  $J$  = 15.8 Hz, 1H), 6.25–6.18 (m, 1H), 6.00 (dd,  $J$  = 14.6, 3.8 Hz, 1H), 5.75 (dd,  $J$  = 20.3, 3.8 Hz, 1H), 3.88–3.84 (m, 4H), 3.19–3.16 (m, 4H), 0.22 (s, 6H).

**<sup>13</sup>C NMR** (126 MHz, CDCl<sub>3</sub>):  $\delta$  151.13, 144.39, 138.68, 132.15, 130.30, 127.48, 123.68, 115.31, 66.88, 49.06, -2.78.

**HRMS** (ESI)  $m/z$  ([M+H]<sup>+</sup>) calcd for C<sub>16</sub>H<sub>24</sub>NOSi: 274.1622 Found: 274.1629.

**(E)-1-(4-(2-(Dimethyl(vinyl)silyl)vinyl)phenyl)-1H-1,2,4-triazole (28)**

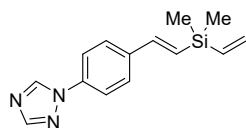

This compound was prepared according to the method A. After purification by column chromatography (SiO<sub>2</sub>: 15% ethyl acetate in petroleum ether), the title compound was isolated in 61% yield (31.16 mg, 0.122 mmol) as a yellow oil.

**<sup>1</sup>H NMR** (500 MHz, CDCl<sub>3</sub>):  $\delta$  8.55 (s, 1H), 8.10 (s, 1H), 7.64 (d,  $J$  = 8.7 Hz, 2H), 7.56 (d,  $J$  = 8.7

Hz, 2H), 6.92 (d,  $J = 19.1$  Hz, 1H), 6.52 (d,  $J = 19.1$  Hz, 1H), 6.22 (dd,  $J = 20.2, 14.6$  Hz, 1H), 6.04 (dd,  $J = 14.6, 3.7$  Hz, 1H), 5.78 (dd,  $J = 20.3, 3.8$  Hz, 1H), 0.25 (s, 6H).

**$^{13}\text{C}$  NMR** (126 MHz,  $\text{CDCl}_3$ ):  $\delta$  152.60, 143.11, 140.74, 138.26, 137.83, 136.34, 132.71, 129.37, 127.71, 120.00, -2.99.

**HRMS** (ESI)  $m/z$  ( $[\text{M}+\text{H}]^+$ ) calcd for  $\text{C}_{14}\text{H}_{18}\text{N}_3\text{Si}$ : 256.1265. Found: 256.1265.

**Dimethyl((1*E*,3*E*)-4-phenylbuta-1,3-dien-1-yl)(vinyl)silane (29)**

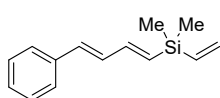

This compound was prepared according to the method A. After purification by column chromatography ( $\text{SiO}_2$ : petroleum ether), the title compound was isolated in 37% yield (15.95 mg, 0.064 mmol) as a colorless oil.

**$^1\text{H}$  NMR** (500 MHz,  $\text{CDCl}_3$ ):  $\delta$  7.40 (d,  $J = 7.0$  Hz, 2H), 7.31 (t,  $J = 7.7$  Hz, 2H), 7.22 (t,  $J = 6.6$  Hz, 1H), 6.79 (dd,  $J = 15.1, 9.9$  Hz, 1H), 6.71 (dd,  $J = 17.9, 10.1$  Hz, 1H), 6.58 (d,  $J = 15.3$  Hz, 1H), 6.18 (dd,  $J = 20.3, 14.6$  Hz, 1H), 6.03–5.94 (m, 2H), 5.73 (dd,  $J = 20.3, 3.8$  Hz, 1H), 0.19 (s, 6H).

**$^{13}\text{C}$  NMR** (126 MHz,  $\text{CDCl}_3$ ):  $\delta$  145.31, 138.27, 137.18, 133.32, 132.56, 132.32, 131.59, 128.65, 127.77, 126.61, -2.91.

**(*E*)-(4-Methoxystyryl)(methyl)(phenyl)(vinyl)silane (30)**

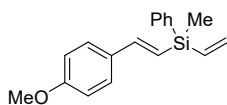

This compound was prepared according to the method A. After purification by column chromatography ( $\text{SiO}_2$ : 5% ethyl acetate in petroleum ether), the title compound was isolated in 99% yield (55.53 mg, 0.198 mmol) as a colorless oil.

**$^1\text{H}$  NMR** (500 MHz,  $\text{CDCl}_3$ ):  $\delta$  7.62–7.55 (m, 2H), 7.42–7.34 (m, 5H), 6.91 (d,  $J = 19.1$  Hz, 1H), 6.88–6.84 (m, 2H), 6.48–6.31 (m, 2H), 6.15 (dd,  $J = 14.6, 3.8$  Hz, 1H), 5.82 (dd,  $J = 20.2, 3.8$  Hz, 1H), 3.80 (s, 3H), 0.50 (s, 3H).

**$^{13}\text{C}$  NMR** (126 MHz,  $\text{CDCl}_3$ ):  $\delta$  159.85, 146.15, 136.94, 136.34, 134.55, 134.29, 131.16, 129.23, 127.90, 127.87, 121.95, 113.94, 55.35, -4.14.

**(*E*)-(4-Methoxystyryl)(methyl)(*o*-tolyl)(vinyl)silane (31)**

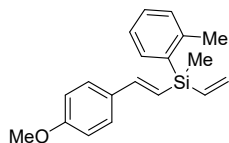

This compound was prepared according to the method A. After purification by column chromatography ( $\text{SiO}_2$ : 5% ethyl acetate in petroleum ether), the title compound was isolated in 61% yield (35.93 mg, 0.122 mmol) as a

colorless oil.

**<sup>1</sup>H NMR** (500 MHz, CDCl<sub>3</sub>):  $\delta$  7.54 (dd,  $J$  = 7.4, 1.5 Hz, 1H), 7.41–7.37 (m, 2H), 7.29 (td,  $J$  = 7.5, 1.6 Hz, 1H), 7.17 (t,  $J$  = 7.6 Hz, 2H), 6.89 (d,  $J$  = 19.1 Hz, 1H), 6.87–6.83 (m, 2H), 6.51–6.38 (m, 2H), 6.13 (dd,  $J$  = 14.6, 3.6 Hz, 1H), 5.81 (dd,  $J$  = 20.3, 3.6 Hz, 1H), 3.80 (s, 3H), 2.45 (s, 3H), 0.54 (s, 3H).

**<sup>13</sup>C NMR** (126 MHz, CDCl<sub>3</sub>):  $\delta$  159.78, 145.99, 137.17, 136.73, 136.42, 135.10, 134.14, 131.54, 131.16, 130.01, 127.85, 127.76, 122.07, 113.89, 55.29, 21.52, -4.17.

**HRMS** (ESI)  $m/z$  ([M+H]<sup>+</sup>) calcd for C<sub>19</sub>H<sub>23</sub>OSi: 295.1513. Found: 295.1449.

**(*E*)-(4-Methoxystyryl)(methyl)(*m*-tolyl)(vinyl)silane (32)**

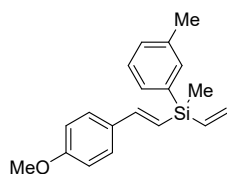

This compound was prepared according to the method A. After purification by column chromatography (SiO<sub>2</sub>: 5% ethyl acetate in petroleum ether), the title compound was isolated in 69% yield (50.65 mg, 0.138 mmol) as a colorless oil.

**<sup>1</sup>H NMR** (500 MHz, CDCl<sub>3</sub>):  $\delta$  7.39 (td,  $J$  = 7.8, 7.2, 3.4 Hz, 4H), 7.26 (t,  $J$  = 7.5 Hz, 1H), 7.18 (d,  $J$  = 7.6 Hz, 1H), 6.91 (d,  $J$  = 19.2 Hz, 1H), 6.88–6.83 (m, 2H), 6.47–6.32 (m, 2H), 6.14 (dd,  $J$  = 14.6, 3.7 Hz, 1H), 5.82 (dd,  $J$  = 20.3, 3.7 Hz, 1H), 3.79 (s, 3H), 2.35 (s, 3H), 0.49 (s, 3H).

**<sup>13</sup>C NMR** (126 MHz, CDCl<sub>3</sub>):  $\delta$  159.82, 146.04, 137.21, 136.77, 136.46, 135.14, 134.17, 131.58, 131.20, 130.06, 127.89, 127.80, 122.11, 113.93, 55.33, 21.56, -4.12.

**(*E*)-(4-Methoxystyryl)(methyl)(*p*-tolyl)(vinyl)silane (33)**

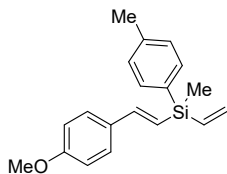

This compound was prepared according to the method A. After purification by column chromatography (SiO<sub>2</sub>: 5% ethyl acetate in petroleum ether), the title compound was isolated in 86% yield (50.65 mg, 0.172 mmol) as a colorless oil.

**<sup>1</sup>H NMR** (500 MHz, CDCl<sub>3</sub>):  $\delta$  7.50–7.45 (m, 2H), 7.41–7.37 (m, 2H), 7.19 (d,  $J$  = 8.2 Hz, 2H), 6.90 (d,  $J$  = 19.1 Hz, 1H), 6.87–6.84 (m, 2H), 6.44–6.32 (m, 2H), 6.13 (dd,  $J$  = 14.6, 3.7 Hz, 1H), 5.81 (dd,  $J$  = 20.3, 3.8 Hz, 1H), 3.80 (s, 3H), 2.35 (s, 3H), 0.48 (s, 3H).

**<sup>13</sup>C NMR** (126 MHz, CDCl<sub>3</sub>):  $\delta$  159.80, 145.98, 139.12, 136.57, 134.60, 134.09, 133.20, 131.21, 128.73, 127.87, 122.23, 113.93, 55.32, 21.52, -4.04.

**HRMS** (ESI)  $m/z$  ( $[M+K]^+$ ) calcd for  $C_{19}H_{22}KOSi$ : 333.1072. Found: 333.1075.

**(E)-(4-Fluorophenyl)(4-methoxystyryl)(methyl)(vinyl)silane (34)**

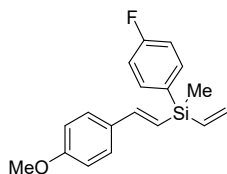

This compound was prepared according to the method A. After purification by column chromatography ( $SiO_2$ : 5% ethyl acetate in petroleum ether), the title compound was isolated in 97% yield (57.89 mg, 0.194 mmol) as a colorless solid.

**$^1H$  NMR** (500 MHz,  $CDCl_3$ ):  $\delta$  7.57–7.51 (m, 2H), 7.41–7.37 (m, 2H), 7.09–7.03 (m, 2H), 6.89 (d,  $J$  = 16.7 Hz, 1H), 6.87–6.84 (m, 2H), 6.42–6.30 (m, 2H), 6.15 (dd,  $J$  = 14.6, 3.7 Hz, 1H), 5.81 (dd,  $J$  = 20.3, 3.7 Hz, 1H), 3.81 (s, 3H), 0.48 (s, 3H).

**$^{13}C$  NMR** (126 MHz,  $CDCl_3$ ):  $\delta$  164.87 (d,  $J$  = 248.2 Hz), 159.93, 146.38, 136.52 (d,  $J$  = 7.6 Hz), 136.14, 134.49, 132.38, 131.01, 127.92, 121.61, 115.10 (d,  $J$  = 20.2 Hz), 113.97, 55.32, -3.99.

**M.p.:** 48–49 °C.

**(E)-(4-Methoxystyryl)(methyl)(naphthalen-2-yl)(vinyl)silane (35)**

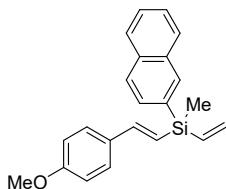

This compound was prepared according to the method A. After purification by column chromatography ( $SiO_2$ : 5% ethyl acetate in petroleum ether), the title compound was isolated in 63% yield (41.64 mg, 0.126 mmol) as a colorless oil.

**$^1H$  NMR** (500 MHz,  $CDCl_3$ ):  $\delta$  8.07 (d,  $J$  = 1.1 Hz, 1H), 7.82 (dt,  $J$  = 9.6, 6.9 Hz, 3H), 7.64 (dd,  $J$  = 8.1, 1.2 Hz, 1H), 7.48–7.45 (m, 2H), 7.42–7.38 (m, 2H), 6.95 (d,  $J$  = 19.1 Hz, 1H), 6.87–6.83 (m, 2H), 6.51–6.40 (m, 2H), 6.18 (dd,  $J$  = 14.6, 3.7 Hz, 1H), 5.87 (dd,  $J$  = 20.3, 3.7 Hz, 1H), 3.78 (s, 3H), 0.58 (s, 3H).

**$^{13}C$  NMR** (126 MHz,  $CDCl_3$ ):  $\delta$  159.87, 146.36, 136.30, 135.36, 134.50, 134.37, 133.86, 133.00, 131.13, 130.68, 128.16, 127.94, 127.75, 127.05, 126.46, 125.93, 121.85, 113.96, 55.32, -4.02.

**(E)-(4-Methoxystyryl)(methyl)(3-phenylpropyl)(vinyl)silane (36)**

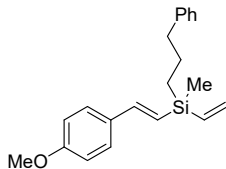

This compound was prepared according to the method A. After purification by column chromatography ( $SiO_2$ : 5% ethyl acetate in petroleum ether), the title compound was isolated in 79% yield (50.96 mg, 0.158 mmol) as a



colorless oil.

**<sup>1</sup>H NMR** (500 MHz, CDCl<sub>3</sub>):  $\delta$  7.38–7.34 (m, 2H), 7.29–7.24 (m, 2H), 7.17 (dt,  $J$  = 7.2, 3.8 Hz, 3H), 6.87–6.80 (m, 3H), 6.25 (d,  $J$  = 19.1 Hz, 1H), 6.19 (dd,  $J$  = 20.3, 14.7 Hz, 1H), 6.02 (dd,  $J$  = 14.6, 3.9 Hz, 1H), 5.74 (dd,  $J$  = 20.3, 3.9 Hz, 1H), 3.80 (s, 3H), 2.64 (t,  $J$  = 7.6 Hz, 2H), 1.74–1.64 (m, 2H), 0.79–0.72 (m, 2H), 0.20 (s, 3H).

**<sup>13</sup>C NMR** (126 MHz, CDCl<sub>3</sub>):  $\delta$  159.69, 144.80, 142.59, 137.31, 132.86, 131.27, 128.55, 128.25, 127.71, 125.67, 123.07, 113.91, 55.30, 39.81, 25.96, 14.28, -4.84.

***sec*-Butyl (*E*)-2-((4-(2-(dimethyl(vinyl)silyl)vinyl)benzoyl)oxy)ethyl)piperidine-1-carboxylate (37)**

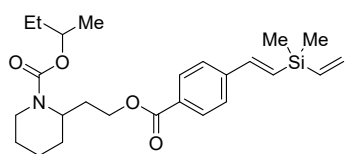

This compound was prepared according to the method A. After purification by column chromatography (SiO<sub>2</sub>: 10% ethyl acetate in petroleum ether), the title compound was isolated in 58% yield (51.46 mg, 0.116 mmol) as a yellow oil.

**<sup>1</sup>H NMR** (500 MHz, CDCl<sub>3</sub>):  $\delta$  8.00 (d,  $J$  = 8.3 Hz, 2H), 7.50–7.47 (m, 2H), 6.93 (d,  $J$  = 19.1 Hz, 1H), 6.60 (d,  $J$  = 19.1 Hz, 1H), 6.22 (dd,  $J$  = 20.3, 14.6 Hz, 1H), 6.04 (dd,  $J$  = 14.6, 3.8 Hz, 1H), 5.77 (dd,  $J$  = 20.3, 3.8 Hz, 1H), 4.74 (qd,  $J$  = 6.2, 2.0 Hz, 1H), 4.53 (s, 1H), 4.32 (q,  $J$  = 5.6, 4.8 Hz, 2H), 4.09 (s, 1H), 2.87 (t,  $J$  = 13.2 Hz, 1H), 2.22 (ddd,  $J$  = 12.8, 9.2, 6.8 Hz, 1H), 1.90 (dd,  $J$  = 14.2, 6.3 Hz, 1H), 1.74–1.53 (m, 8H), 1.18 (d,  $J$  = 6.2 Hz, 3H), 0.88 (t,  $J$  = 7.5 Hz, 3H), 0.25 (s, 6H).

**<sup>13</sup>C NMR** (126 MHz, CDCl<sub>3</sub>):  $\delta$  166.39, 155.60 (d,  $J$  = 3.8 Hz), 143.73, 142.46, 137.77, 132.76, 130.95, 129.95, 129.59, 126.32, 73.06, 62.69, 48.07, 29.73, 29.11, 25.55, 22.73, 19.82, 19.10, 9.78, -3.02, -3.62.

**HRMS** (ESI)  $m/z$  ([M+Na]<sup>+</sup>) calcd for C<sub>25</sub>H<sub>37</sub>NNaO<sub>4</sub>Si: 466.2384. Found: 466.2398.

**4-((1*R*,4*R*)-2-(4-Fluorophenyl)-4-((*S*)-3-(4-fluorophenyl)-3-hydroxypropyl)-3-oxocyclobutyl)phenyl 4-((*E*)-2-(dimethyl(vinyl)silyl)vinyl)benzoate (38)**

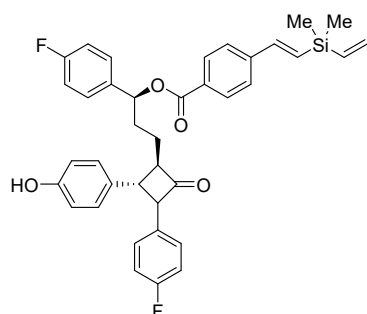

This compound was prepared according to the method A. After purification by column chromatography (SiO<sub>2</sub>: petroleum ether), the title compound was isolated in 55% yield (68.51 mg, 0.110

mmol) as a white solid.

**<sup>1</sup>H NMR** (500 MHz, CDCl<sub>3</sub>):  $\delta$  8.17–8.08 (m, 2H), 7.56–7.51 (m, 2H), 7.40–7.33 (m, 2H), 7.23 (dd,  $J$  = 8.8, 5.1 Hz, 6H), 6.97 (dt,  $J$  = 23.9, 8.8 Hz, 4H), 6.79 (dd,  $J$  = 17.6, 10.9 Hz, 1H), 6.06–5.87 (m, 3H), 5.70 (dd,  $J$  = 19.4, 4.8 Hz, 1H), 5.44 (d,  $J$  = 10.9 Hz, 1H), 4.66 (t,  $J$  = 5.9 Hz, 1H), 4.63 (d,  $J$  = 2.4 Hz, 1H), 3.07 (td,  $J$  = 7.5, 2.4 Hz, 1H), 1.91 (ddd,  $J$  = 8.6, 6.4, 3.4 Hz, 2H), 1.87–1.81 (m, 2H), 0.11 (s, 3H), 0.05 (s, 3H).

**<sup>13</sup>C NMR** (126 MHz, CDCl<sub>3</sub>):  $\delta$  167.25, 164.82, 151.07, 142.87, 140.34, 137.35, 135.91, 135.30, 133.89, 133.43, 130.57, 128.30, 127.47 (d,  $J$  = 8.8 Hz), 127.01, 126.39, 122.68, 118.41 (d,  $J$  = 8.8 Hz), 117.19, 116.02, 115.84, 115.19, 115.02, 74.00, 60.85, 60.65, 37.86, 25.02, -1.50, -1.73.

**<sup>19</sup>F NMR** (471 MHz, CDCl<sub>3</sub>):  $\delta$  -115.57, -117.99.

**M.p.:** 87–88 °C.

#### 2-(4-Isobutylphenyl)propyl (*E*)-4-(2-(dimethyl(vinyl)silyl)vinyl)benzoate (39)

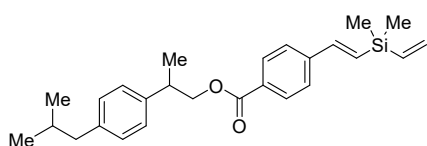

This compound was prepared according to the method A.

After purification by column chromatography (SiO<sub>2</sub>: petroleum ether), the title compound was isolated in 65%

yield (52.86 mg, 0.130 mmol) as a yellow oil.

**<sup>1</sup>H NMR** (500 MHz, CDCl<sub>3</sub>):  $\delta$  7.95–7.92 (m, 2H), 7.47–7.44 (m, 2H), 7.20–7.18 (m, 2H), 7.10 (d,  $J$  = 8.0 Hz, 2H), 6.92 (d,  $J$  = 19.1 Hz, 1H), 6.59 (d,  $J$  = 19.2 Hz, 1H), 6.21 (dd,  $J$  = 20.3, 14.6 Hz, 1H), 6.03 (dd,  $J$  = 14.6, 3.8 Hz, 1H), 5.77 (dd,  $J$  = 20.3, 3.8 Hz, 1H), 4.40 (dd,  $J$  = 10.7, 6.7 Hz, 1H), 4.35 (dd,  $J$  = 10.7, 7.5 Hz, 1H), 3.22 (q,  $J$  = 7.0 Hz, 1H), 2.45 (d,  $J$  = 7.2 Hz, 2H), 1.85 (dt,  $J$  = 13.5, 6.8 Hz, 1H), 1.38 (d,  $J$  = 7.0 Hz, 3H), 0.89 (d,  $J$  = 6.6 Hz, 6H), 0.24 (s, 6H).

**<sup>13</sup>C NMR** (126 MHz, CDCl<sub>3</sub>):  $\delta$  166.33, 143.72, 142.43, 140.37, 140.10, 137.77, 132.75, 130.92, 129.89, 129.26, 127.07, 126.31, 70.06, 53.45, 45.07, 38.72, 30.24, 22.43, 18.07, -3.02.

**HRMS** (ESI)  $m/z$  ([M+Na]<sup>+</sup>) calcd for C<sub>26</sub>H<sub>34</sub>NaO<sub>2</sub>Si: 429.2220. Found: 429.2207.

#### (5*S*,8*R*,9*S*,10*S*,13*S*,14*S*)-10,13-Dimethyl-17-oxohexadecahydro-1*H*-

#### cyclopenta[*a*]phenanthren-3-yl 4-((*E*)-2-(dimethyl(vinyl)silyl)vinyl)benzoate (40)

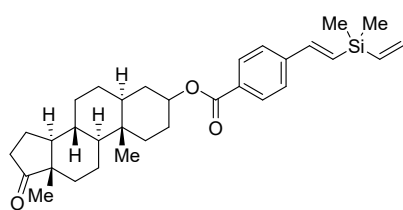

This compound was prepared according to the method A.

After purification by column chromatography (SiO<sub>2</sub>: 5% ethyl acetate in petroleum ether), the title compound was isolated in 51% yield (51.49 mg, 0.102 mmol) as a colorless oil.

**<sup>1</sup>H NMR** (500 MHz, CDCl<sub>3</sub>):  $\delta$  7.98 (d,  $J$  = 8.0 Hz, 2H), 7.47 (d,  $J$  = 8.4 Hz, 2H), 6.93 (d,  $J$  = 19.1 Hz, 1H), 6.59 (d,  $J$  = 19.2 Hz, 1H), 6.21 (dd,  $J$  = 20.2, 14.6 Hz, 1H), 6.04 (dd,  $J$  = 14.6, 3.8 Hz, 1H), 5.77 (dd,  $J$  = 19.3, 3.8 Hz, 1H), 4.94 (tt,  $J$  = 10.9, 4.9 Hz, 1H), 2.47–2.41 (m, 1H), 2.10–2.04 (m, 1H), 1.98–1.92 (m, 2H), 1.80 (dt,  $J$  = 13.4, 3.2 Hz, 4H), 1.70–1.65 (m, 2H), 1.57–1.49 (m, 3H), 1.37–1.28 (m, 6H), 1.14–1.09 (m, 1H), 1.00 (dd,  $J$  = 11.7, 7.5 Hz, 1H), 0.90 (s, 3H), 0.87 (s, 3H), 0.78–0.73 (m, 1H), 0.25 (d,  $J$  = 1.0 Hz, 6H).

**<sup>13</sup>C NMR** (126 MHz, CDCl<sub>3</sub>):  $\delta$  165.93, 143.76, 141.71, 137.78, 133.39, 131.14, 130.13, 129.86, 126.24, 74.12, 54.36, 51.40, 47.82, 44.75, 36.79, 35.88, 35.74, 35.09, 34.09, 31.57, 30.85, 28.33, 27.56, 21.81, 20.52, 13.85, 12.32, -3.02.

**HRMS** (ESI)  $m/z$  ([M+H]<sup>+</sup>) calcd for C<sub>32</sub>H<sub>45</sub>O<sub>3</sub>Si: 505.3132. Found: 505.3142.

**M.p.:** 188–189 °C.

**(9*R*,13*R*,*E*)-3,9,13,17-Tetramethyloctadec-2-en-1-yl 4-((*E*)-2-(dimethyl(vinyl)silyl)vinyl)**

**Benzoate (41)**

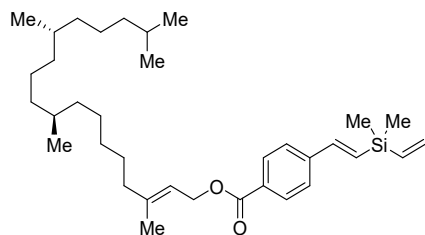

This compound was prepared according to the method A.

After purification by column chromatography (SiO<sub>2</sub>: 5% ethyl acetate in petroleum ether), the title compound was isolated in 56% yield (60.36 mg, 0.112 mmol) as a colorless oil.

**<sup>1</sup>H NMR** (500 MHz, CDCl<sub>3</sub>):  $\delta$  8.02–7.99 (m, 2H), 7.49–7.46 (m, 2H), 6.93 (d,  $J$  = 19.1 Hz, 1H), 6.59 (d,  $J$  = 19.1 Hz, 1H), 6.21 (dd,  $J$  = 20.3, 14.6 Hz, 1H), 6.04 (dd,  $J$  = 14.6, 3.7 Hz, 1H), 5.77 (dd,  $J$  = 20.3, 3.8 Hz, 1H), 5.48–5.44 (m, 1H), 4.83 (d,  $J$  = 6.9 Hz, 2H), 2.04 (d,  $J$  = 6.4 Hz, 2H), 1.75 (s, 3H), 1.54–1.51 (m, 1H), 1.39 (d,  $J$  = 6.4 Hz, 2H), 1.37–1.33 (m, 2H), 1.32–1.26 (m, 8H), 1.18–1.01 (m, 10H), 0.87 (s, 3H), 0.86 (s, 3H), 0.84 (d,  $J$  = 6.6 Hz, 6H), 0.25 (s, 6H).

**<sup>13</sup>C NMR** (126 MHz, CDCl<sub>3</sub>):  $\delta$  166.53, 143.79, 142.86, 142.36, 137.80, 132.75, 130.82, 129.96, 129.83, 126.30, 118.21, 61.97, 39.93, 39.42, 37.48, 37.42, 37.34, 36.68, 32.84, 32.71, 28.03, 25.09,

24.84, 24.51, 22.77, 22.68, 19.80, 16.52, 14.17, 0.04, -3.01.

**(S)-3,7-dimethyloct-6-en-1-yl (E)-4-(2-(dimethyl(vinyl)silyl)vinyl)benzoate (42)**

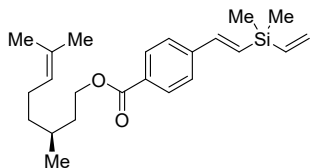

This compound was prepared according to the method A. After purification by column chromatography (SiO<sub>2</sub>: 5% ethyl acetate in petroleum ether), the title compound was isolated in 63% yield (46.70 mg, 0.126 mmol) as a colorless oil.

**<sup>1</sup>H NMR** (500 MHz, CDCl<sub>3</sub>):  $\delta$  8.01–7.97 (m, 2H), 7.50–7.46 (m, 2H), 6.93 (d,  $J$  = 19.1 Hz, 1H), 6.60 (d,  $J$  = 19.1 Hz, 1H), 6.22 (dd,  $J$  = 20.2, 14.7 Hz, 1H), 6.04 (dd,  $J$  = 14.6, 3.8 Hz, 1H), 5.77 (dd,  $J$  = 20.2, 3.9 Hz, 1H), 5.12–5.08 (m, 1H), 4.37–4.33 (m, 2H), 2.00 (d,  $J$  = 8.9 Hz, 2H), 1.87–1.71 (m, 2H), 1.68 (s, 3H), 1.61 (s, 3H), 1.57 (t,  $J$  = 5.8 Hz, 1H), 1.46–1.37 (m, 2H), 0.97 (d,  $J$  = 6.6 Hz, 3H), 0.25 (s, 6H).

**<sup>13</sup>C NMR** (126 MHz, CDCl<sub>3</sub>):  $\delta$  166.51, 143.75, 142.38, 137.78, 132.75, 131.42, 130.86, 129.89, 129.81, 126.31, 124.61, 63.54, 37.03, 35.55, 29.60, 25.75, 25.44, 19.56, 17.71, -3.01.

**HRMS** (ESI)  $m/z$  ([M+Na]<sup>+</sup>) calcd for C<sub>23</sub>H<sub>34</sub>NaO<sub>2</sub>Si: 393.2220. Found: 393.2229.

**(4-(Prop-1-en-2-yl)cyclohex-1-en-1-yl)methyl (E)-4-(2-(dimethyl(vinyl)silyl)vinyl)benzoate (43)**

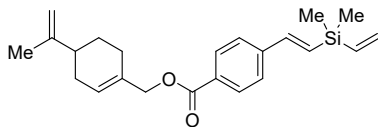

This compound was prepared according to the method A. After purification by column chromatography (SiO<sub>2</sub>: 5% ethyl acetate in petroleum ether), the title compound was isolated in

73% yield (64.52 mg, 0.146 mmol) as a colorless oil.

**<sup>1</sup>H NMR** (500 MHz, CDCl<sub>3</sub>):  $\delta$  8.01 (d,  $J$  = 8.3 Hz, 2H), 7.49 (d,  $J$  = 8.3 Hz, 2H), 6.93 (d,  $J$  = 19.1 Hz, 1H), 6.60 (d,  $J$  = 19.1 Hz, 1H), 6.22 (dd,  $J$  = 20.2, 14.6 Hz, 1H), 6.04 (dd,  $J$  = 14.6, 3.9 Hz, 1H), 5.84 (s, 1H), 5.77 (dd,  $J$  = 20.2, 3.9 Hz, 1H), 4.75–4.72 (m, 2H), 4.71 (s, 2H), 2.21–2.15 (m, 5H), 2.02 (d,  $J$  = 15.4 Hz, 1H), 1.88 (d,  $J$  = 12.1 Hz, 1H), 1.75 (s, 3H), 0.25 (s, 6H).

**<sup>13</sup>C NMR** (126 MHz, CDCl<sub>3</sub>):  $\delta$  166.33, 149.66, 143.73, 142.48, 137.78, 132.77, 132.73, 130.96, 129.97, 129.65, 126.33, 125.71, 108.84, 68.88, 40.91, 30.52, 27.38, 26.11, 20.80, -2.37.

**(8S,9S,10S,13R,14S)-10,13-Dimethyl-17-((R)-6-methylheptan-2-yl)-**

**2,3,4,5,8,9,10,11,12,13,14,15,16,17-tetradecahydro-1*H*-cyclopenta[*a*]phenanthren-3-yl 4-((*E*)-2-(dimethyl(vinyl)silyl)-vinyl)benzoate (44)**

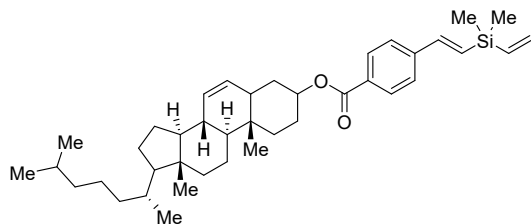

This compound was prepared according to the method A. After purification by column chromatography (SiO<sub>2</sub>: 5% ethyl acetate in petroleum ether), the title compound was isolated

in 81% yield (97.38 mg, 0.162 mmol) as a white solid.

**<sup>1</sup>H NMR** (500 MHz, CDCl<sub>3</sub>):  $\delta$  8.01–7.98 (m, 2H), 7.49–7.46 (m, 2H), 6.93 (d,  $J$  = 19.1 Hz, 1H), 6.59 (d,  $J$  = 19.2 Hz, 1H), 6.22 (dd,  $J$  = 20.3, 14.6 Hz, 1H), 6.04 (dd,  $J$  = 14.6, 3.7 Hz, 1H), 5.77 (dd,  $J$  = 20.2, 3.8 Hz, 1H), 5.42 (d,  $J$  = 5.1 Hz, 1H), 4.85 (dtd,  $J$  = 12.1, 8.4, 4.5 Hz, 1H), 2.46 (d,  $J$  = 7.3 Hz, 2H), 2.01 (tt,  $J$  = 11.8, 4.0 Hz, 4H), 1.92 (dt,  $J$  = 13.2, 3.5 Hz, 1H), 1.84 (ddd,  $J$  = 13.1, 6.6, 3.7 Hz, 1H), 1.74 (dt,  $J$  = 11.7, 3.0 Hz, 1H), 1.58 (dd,  $J$  = 10.5, 3.6 Hz, 2H), 1.51 (q,  $J$  = 6.7 Hz, 4H), 1.46 (d,  $J$  = 4.6 Hz, 1H), 1.36–1.32 (m, 1H), 1.23 (d,  $J$  = 3.4 Hz, 1H), 1.21 (t,  $J$  = 3.4 Hz, 1H), 1.18 (d,  $J$  = 4.8 Hz, 1H), 1.16–1.14 (m, 1H), 1.13 (d,  $J$  = 2.0 Hz, 1H), 1.12 (d,  $J$  = 2.1 Hz, 1H), 1.09 (s, 1H), 1.07 (s, 3H), 1.00 (td,  $J$  = 11.2, 10.7, 5.0 Hz, 4H), 0.92 (d,  $J$  = 6.5 Hz, 3H), 0.87 (d,  $J$  = 2.3 Hz, 3H), 0.86 (d,  $J$  = 2.3 Hz, 3H), 0.69 (s, 3H), 0.25 (s, 6H).

**<sup>13</sup>C NMR** (126 MHz, CDCl<sub>3</sub>):  $\delta$  165.86, 143.80, 142.32, 139.74, 137.82, 132.75, 130.77, 130.13, 129.90, 126.27, 122.82, 74.63, 56.75, 56.19, 50.10, 42.38, 39.80, 39.57, 38.28, 37.10, 36.71, 36.24, 35.85, 31.58, 28.29, 28.07, 27.95, 24.35, 23.88, 22.87, 22.62, 21.11, 19.44, 18.77, 11.92, -3.00.

**M.p.:** 189-190 °C.

**2-(4-((*Z*)-4-Chloro-1,2-diphenylbut-1-en-1-yl)phenoxy)ethyl 4-((*E*)-2-(dimethyl(vinyl)silyl)-vinyl)benzoate (45)**

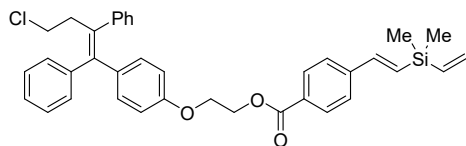

This compound was prepared according to the method A. After purification by column chromatography (SiO<sub>2</sub>: 40% ethyl acetate in petroleum ether), the title

compound was isolated in 59% yield (70.01 mg, 0.118 mmol) as a colorless oil.

**<sup>1</sup>H NMR** (500 MHz, CDCl<sub>3</sub>):  $\delta$  7.99–7.96 (m, 2H), 7.47–7.44 (m, 2H), 7.38–7.35 (m, 2H), 7.30–7.27 (m, 3H), 7.19 (d,  $J$  = 6.2 Hz, 2H), 7.16–7.13 (m, 3H), 6.92 (d,  $J$  = 19.2 Hz, 1H), 6.82–6.79 (m, 2H), 6.61–6.57 (m, 3H), 6.21 (dd,  $J$  = 20.2, 14.6 Hz, 1H), 6.04 (dd,  $J$  = 14.6, 3.8 Hz, 1H), 5.77 (dd,  $J$  = 20.3, 3.8 Hz, 1H), 4.58–4.55 (m, 2H), 4.18–4.15 (m, 2H), 3.41 (t,  $J$  = 7.5 Hz, 2H), 2.92 (t,  $J$  = 7.5 Hz, 2H), 0.25 (s, 6H).

**<sup>13</sup>C NMR** (126 MHz, CDCl<sub>3</sub>):  $\delta$  166.30, 156.77, 143.65, 142.85, 142.63, 141.66, 140.94, 137.72, 135.36, 135.33, 132.77, 131.78, 131.13, 130.06, 129.55, 129.40, 129.08, 128.38, 128.26, 126.99, 126.65, 126.31, 113.63, 65.77, 63.33, 42.85, 38.60, -3.04.

**HRMS** (ESI)  $m/z$  ([M+Na]<sup>+</sup>) calcd for C<sub>37</sub>H<sub>37</sub>ClNaO<sub>3</sub>Si: 615.2093. Found: 615.2015.

## Part 4. Coupling of Chlorohydrosilanes with Vinyl Halides

### 1. General Procedure

**General procedure for the reaction of chlorohydrosilanes with vinyl halides (method B):** To a dried Schlenk line was charged with vinyl halides (0.2 mmol, 100 mol%), 2,2'-bipyridine (3.12 mg, 0.02 mmol, 10 mol%), Fe(acac)<sub>3</sub> (7.26 mg, 0.02 mmol, 10 mol%) at 25 °C. The Schlenk line was sealed with an atmosphere of nitrogen. Chlorodimethylsilane (56.77 mg, 0.6 mmol, 300 mol%) was added followed by addition of DMF (1 mL) via syringes. The reaction mixture was allowed to maintain 35 °C and stirred overnight. The reaction mixture was purified by column chromatograph to afford the product as a solid or oil.

### 2. Experimental Details

#### (*E*)-(4-Methoxystyryl)dimethylsilane (46)

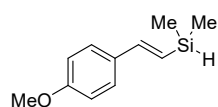

This compound was prepared according to the method B. After purification by column chromatography (SiO<sub>2</sub>: 5% ethyl acetate in petroleum ether), the title compound was isolated in 82% yield (31.16 mg, 0.162 mmol) as a colorless oil.

**<sup>1</sup>H NMR** (500 MHz, CDCl<sub>3</sub>):  $\delta$  7.40–7.35 (m, 2H), 6.91 (d,  $J$  = 19.0 Hz, 1H), 6.88–6.83 (m, 2H), 6.28 (dd,  $J$  = 19.1, 2.6 Hz, 1H), 4.20 (dq,  $J$  = 7.3, 3.7 Hz, 1H), 3.79 (s, 3H), 0.22 (d,  $J$  = 3.7 Hz, 6H).

**<sup>13</sup>C NMR** (126 MHz, CDCl<sub>3</sub>):  $\delta$  159.74, 144.81, 131.18, 127.73, 123.22, 114.75, 55.32, -3.85.

#### Methyl (*E*)-4-(2-(dimethylsilyl)vinyl)benzoate (47)

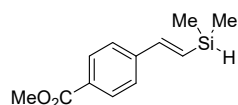

This compound was prepared according to the method B. After purification by column chromatography (SiO<sub>2</sub>: 5% ethyl acetate in petroleum ether), the title compound was isolated in 72% yield (31.73 mg, 0.144 mmol) as a colorless oil.

**<sup>1</sup>H NMR** (500 MHz, CDCl<sub>3</sub>):  $\delta$  8.02–7.98 (m, 2H), 7.51–7.47 (m, 2H), 6.99 (d,  $J$  = 19.1 Hz, 1H), 6.61 (dd,  $J$  = 19.1, 2.6 Hz, 1H), 4.22 (dq,  $J$  = 7.0, 3.4 Hz, 1H), 3.91 (s, 3H), 0.25 (d,  $J$  = 3.7 Hz, 6H).

**<sup>13</sup>C NMR** (126 MHz, CDCl<sub>3</sub>):  $\delta$  166.87, 144.22, 142.31, 129.91, 129.72, 128.21, 126.33, 52.08, -4.12.

**(E)-Dimethyl(4-(trifluoromethyl)styryl)silane (48)**

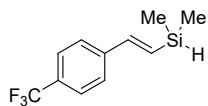

This compound was prepared according to the method B. After purification by column chromatography (SiO<sub>2</sub>: petroleum ether), the title compound was isolated in 65% yield (29.94 mg, 0.130 mmol) as a colorless oil.

**<sup>1</sup>H NMR** (500 MHz, CDCl<sub>3</sub>):  $\delta$  7.58 (d,  $J$  = 8.3 Hz, 2H), 7.52 (d,  $J$  = 8.6 Hz, 2H), 6.98 (d,  $J$  = 19.1 Hz, 1H), 6.58 (dd,  $J$  = 19.1, 2.6 Hz, 1H), 4.22 (dq,  $J$  = 6.6, 3.3 Hz, 1H), 0.26 (d,  $J$  = 3.8 Hz, 6H).

**<sup>13</sup>C NMR** (126 MHz, CDCl<sub>3</sub>):  $\delta$  143.81, 141.45, 130.00, 129.77, 128.51, 126.63, 125.56 (dd,  $J$  = 7.7, 3.7 Hz), -4.11.

**<sup>19</sup>F NMR** (471 MHz, CDCl<sub>3</sub>):  $\delta$  -62.51.

**HRMS** (ESI)  $m/z$  ([M+H]<sup>+</sup>) calcd for C<sub>11</sub>H<sub>14</sub>F<sub>3</sub>Si: 231.0811. Found: 231.0811.

**(E)-(2-(Benzofuran-2-yl)vinyl)dimethylsilane (49)**

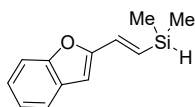

This compound was prepared according to the method B. After purification by column chromatography (SiO<sub>2</sub>: 5% ethyl acetate in petroleum ether), the title compound was isolated in 69% yield (27.92 mg, 0.138 mmol) as a colorless oil.

**<sup>1</sup>H NMR** (500 MHz, CDCl<sub>3</sub>):  $\delta$  7.53 (d,  $J$  = 7.5 Hz, 1H), 7.44 (d,  $J$  = 8.2 Hz, 1H), 7.27 (t,  $J$  = 7.2 Hz, 1H), 7.19 (t,  $J$  = 7.4 Hz, 1H), 6.88 (d,  $J$  = 19.0 Hz, 1H), 6.66 (dd,  $J$  = 19.0, 2.8 Hz, 1H), 6.61 (s, 1H), 4.23 (h,  $J$  = 3.6 Hz, 1H), 0.25 (d,  $J$  = 3.8 Hz, 6H).

**<sup>13</sup>C NMR** (126 MHz, CDCl<sub>3</sub>):  $\delta$  155.28, 154.94, 132.89, 128.92, 128.74, 124.89, 122.89, 121.28, 111.10, 105.35 -4.12.

**(E)-(2-(Benzo[*b*]thiophen-2-yl)vinyl)dimethylsilane (50)**

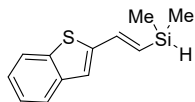

This compound was prepared according to the method B. After purification by column chromatography (SiO<sub>2</sub>: 5% ethyl acetate in petroleum ether), the title compound was isolated in 67% yield (29.26 mg, 0.134 mmol) as a colorless oil.

**<sup>1</sup>H NMR** (500 MHz, CDCl<sub>3</sub>):  $\delta$  7.77–7.72 (m, 1H), 7.70–7.66 (m, 1H), 7.33–7.26 (m, 2H), 7.13 (d,  $J$  = 18.8 Hz, 2H), 6.31 (dd,  $J$  = 18.8, 2.6 Hz, 1H), 4.27–4.16 (m, 1H), 0.25 (d,  $J$  = 3.8 Hz, 6H).

**<sup>13</sup>C NMR** (126 MHz, CDCl<sub>3</sub>):  $\delta$  144.91, 140.19, 139.19, 138.46, 129.40, 124.92, 124.47, 123.86, 123.04, 122.38, -4.04.



**(E)-5-(2-(Dimethylsilyl)vinyl)-2-methoxypyridine (51)**

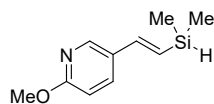

This compound was prepared according to the method B. After purification by column chromatography (SiO<sub>2</sub>: 5% ethyl acetate in petroleum ether), the title compound was isolated in 83% yield (31.71 mg, 0.164 mmol) as a colorless oil.

**<sup>1</sup>H NMR** (500 MHz, CDCl<sub>3</sub>):  $\delta$  8.14 (d,  $J$  = 2.5 Hz, 1H), 7.73 (dd,  $J$  = 8.6, 2.5 Hz, 1H), 6.89 (d,  $J$  = 19.1 Hz, 1H), 6.72 (d,  $J$  = 8.6 Hz, 1H), 6.33 (dd,  $J$  = 19.1, 2.6 Hz, 1H), 4.24–4.15 (m, 1H), 3.94 (s, 3H), 0.24 (d,  $J$  = 3.7 Hz, 6H).

**<sup>13</sup>C NMR** (126 MHz, CDCl<sub>3</sub>):  $\delta$  159.73, 144.81, 131.17, 129.71, 127.73, 123.22, 113.94, 55.32, -3.85.

**(E)-8-(2-(Dimethylsilyl)vinyl)quinoline (52)**

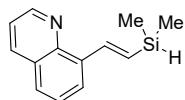

This compound was prepared according to the method B. After purification by column chromatography (SiO<sub>2</sub>: 10% ethyl acetate in petroleum ether), the title compound was isolated in 81% yield (34.56 mg, 0.182 mmol) as a colorless oil.

**<sup>1</sup>H NMR** (500 MHz, CDCl<sub>3</sub>):  $\delta$  8.96 (dd,  $J$  = 4.1, 1.8 Hz, 1H), 8.37 (d,  $J$  = 19.4 Hz, 1H), 8.14 (dd,  $J$  = 8.3, 1.8 Hz, 1H), 7.98 (dd,  $J$  = 7.3, 1.9 Hz, 1H), 7.75 (dd,  $J$  = 8.1, 1.4 Hz, 1H), 7.54 (t,  $J$  = 7.5 Hz, 1H), 7.41 (dd,  $J$  = 8.3, 4.1 Hz, 1H), 6.73 (dd,  $J$  = 19.3, 2.7 Hz, 1H), 4.32 (dt,  $J$  = 7.4, 3.7 Hz, 1H), 0.32 (d,  $J$  = 3.8 Hz, 6H).

**<sup>13</sup>C NMR** (126 MHz, CDCl<sub>3</sub>):  $\delta$  149.68, 141.10, 136.63, 136.23, 128.88, 128.43, 127.88, 126.39, 125.67, 121.09, -3.82.

***tert*-Butyl (E)-4-(2-(dimethylsilyl)vinyl)-1*H*-indole-1-carboxylate (53)**

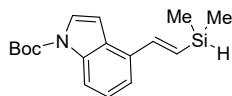

This compound was prepared according to the method B. After purification by column chromatography (SiO<sub>2</sub>: 20% ethyl acetate in petroleum ether), the title compound was isolated in 68% yield (41.00 mg, 0.136 mmol) as a colorless oil.

**<sup>1</sup>H NMR** (500 MHz, CDCl<sub>3</sub>):  $\delta$  8.08 (d,  $J$  = 8.2 Hz, 1H), 7.63 (d,  $J$  = 3.7 Hz, 1H), 7.43 (d,  $J$  = 7.6 Hz, 1H), 7.34 (d,  $J$  = 19.1 Hz, 1H), 7.28 (d,  $J$  = 7.9 Hz, 1H), 6.81 (d,  $J$  = 3.8 Hz, 1H), 6.59 (dd,  $J$  = 19.1, 2.7 Hz, 1H), 4.26 (dq,  $J$  = 7.1, 3.6 Hz, 1H), 1.67 (s, 12H), 0.28 (d,  $J$  = 3.8 Hz, 6H).

**<sup>13</sup>C NMR** (126 MHz, CDCl<sub>3</sub>):  $\delta$  149.79, 144.54, 142.30, 130.82, 128.92, 127.84, 126.54, 124.34,

119.38, 114.84, 105.24, 83.82, 28.24, -3.86.

**(9*R*,13*R*,*E*)-3,9,13,17-Tetramethyloctadec-2-en-1-yl 4-((*E*)-2-(dimethylsilyl)vinyl)benzoate (54)**

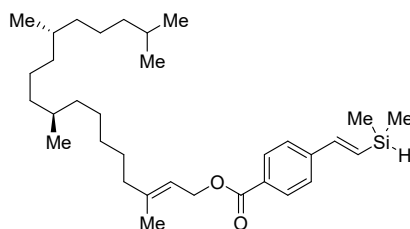

This compound was prepared according to the method B. After purification by column chromatography (SiO<sub>2</sub>: 5% ethyl acetate in petroleum ether), the title compound was isolated in 80% yield (82.06 mg, 0.160 mmol) as a colorless oil.

**<sup>1</sup>H NMR** (500 MHz, CDCl<sub>3</sub>):  $\delta$  8.02–7.99 (m, 2H), 7.50–7.46 (m, 2H), 6.99 (d,  $J$  = 19.1 Hz, 1H), 6.59 (dd,  $J$  = 19.1, 2.7 Hz, 1H), 5.46 (t,  $J$  = 7.9 Hz, 1H), 4.84 (d,  $J$  = 6.9 Hz, 2H), 4.22 (dq,  $J$  = 7.1, 3.6 Hz, 1H), 2.05–2.02 (m, 2H), 1.76 (s, 3H), 1.54–1.50 (m, 1H), 1.41–1.38 (m, 2H), 1.34 (s, 2H), 1.32–1.26 (m, 8H), 1.18–1.01 (m, 10H), 0.87 (s, 3H), 0.86 (s, 3H), 0.84 (d,  $J$  = 6.7 Hz, 6H), 0.25 (d,  $J$  = 3.7 Hz, 6H).

**<sup>13</sup>C NMR** (126 MHz, CDCl<sub>3</sub>):  $\delta$  166.48, 144.32, 142.86, 142.21, 129.98, 129.92, 129.58, 126.29, 118.20, 61.60, 39.93, 39.42, 37.47, 37.41, 37.34, 36.67, 32.83, 32.71, 29.74, 28.02, 25.08, 24.84, 24.51, 22.77, 22.67, 19.77, 16.52, 0.04, -4.08.

**(4-(Prop-1-en-2-yl)cyclohex-1-en-1-yl)methyl (*E*)-4-(2-(dimethylsilyl)vinyl)benzoate (55)**

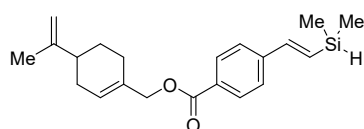

This compound was prepared according to the method B. After purification by column chromatography (SiO<sub>2</sub>: 5% ethyl acetate in petroleum ether), the title compound was isolated in 64% yield (43.59 mg, 0.128 mmol) as a colorless oil.

**<sup>1</sup>H NMR** (500 MHz, CDCl<sub>3</sub>):  $\delta$  8.04–8.00 (m, 2H), 7.51–7.45 (m, 2H), 6.99 (d,  $J$  = 19.1 Hz, 1H), 6.60 (dd,  $J$  = 19.1, 2.6 Hz, 1H), 5.84 (s, 1H), 4.73 (dd,  $J$  = 4.1, 2.5 Hz, 2H), 4.71 (s, 2H), 4.22 (dq,  $J$  = 7.2, 3.6 Hz, 1H), 2.18 (dd,  $J$  = 8.0, 5.4 Hz, 4H), 2.04–1.96 (m, 1H), 1.90–1.84 (m, 1H), 1.74 (s, 3H), 1.53 (tt,  $J$  = 12.6, 8.9 Hz, 1H), 0.25 (d,  $J$  = 3.7 Hz, 6H).

**<sup>13</sup>C NMR** (126 MHz, CDCl<sub>3</sub>):  $\delta$  165.21, 148.55, 143.21, 141.26, 131.67, 128.93, 128.69, 128.65, 125.27, 124.65, 107.79, 67.82, 39.84, 29.46, 26.32, 25.44, 19.73, -5.15.

**HRMS** (ESI)  $m/z$  ( $[M+Na]^+$ ) calcd for  $C_{21}H_{28}NaO_2Si$ : 363.1751. Found: 363.1755.

**Dimethyl((1*E*,3*E*)-4-phenylbuta-1,3-dien-1-yl)silane (56)**

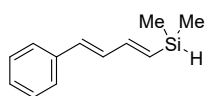

This compound was prepared according to the method B. After purification by column chromatography ( $SiO_2$ : 5% ethyl acetate in petroleum ether), the title compound was isolated in 94% yield (35.41 mg, 0.188 mmol) as a colorless oil.

**$^1H$  NMR** (500 MHz,  $CDCl_3$ ):  $\delta$  7.42–7.39 (m, 2H), 7.31 (t,  $J$  = 7.7 Hz, 2H), 7.24–7.21 (m, 1H), 6.84–6.71 (m, 2H), 6.63–6.55 (m, 1H), 6.03–5.93 (m, 1H), 4.15 (dq,  $J$  = 6.6, 3.6 Hz, 1H), 0.20 (d,  $J$  = 3.7 Hz, 6H).

**$^{13}C$  NMR** (126 MHz,  $CDCl_3$ ):  $\delta$  145.81, 137.11, 133.47, 131.39, 131.28, 128.66, 127.83, 126.64, -4.00.

**(*E*)-Diisopropyl(4-methoxystyryl)silane (57)**

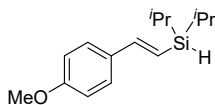

This compound was prepared according to the method B. After purification by column chromatography ( $SiO_2$ : 5% ethyl acetate in petroleum ether), the title compound was isolated in 64% yield (31.80 mg, 0.128 mmol) as a colorless oil.

**$^1H$  NMR** (500 MHz,  $CDCl_3$ ):  $\delta$  7.42–7.37 (m, 2H), 6.98 (d,  $J$  = 19.1 Hz, 1H), 6.90–6.85 (m, 2H), 6.21 (dd,  $J$  = 19.1, 4.7 Hz, 1H), 3.81 (s, 3H), 3.73 (dd,  $J$  = 4.7, 2.0 Hz, 1H), 1.06 (dd,  $J$  = 9.0, 2.9 Hz, 14H).

**$^{13}C$  NMR** (126 MHz,  $CDCl_3$ ):  $\delta$  159.67, 147.03, 131.36, 127.68, 118.71, 113.90, 55.33, 18.86 (d,  $J$  = 34.0 Hz), 10.84.

**(*E*)-(4-Methoxystyryl)(methyl)(phenyl)silane (58)**

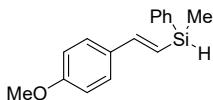

This compound was prepared according to the method B. After purification by column chromatography ( $SiO_2$ : 5% ethyl acetate in petroleum ether), the title compound was isolated in 74% yield (37.65 mg, 0.140 mmol) as a colorless oil.

**$^1H$  NMR** (500 MHz,  $CDCl_3$ ):  $\delta$  7.61–7.57 (m, 2H), 7.40–7.35 (m, 5H), 6.98 (d,  $J$  = 19.0 Hz, 1H), 6.87–6.84 (m, 2H), 6.37 (dd,  $J$  = 19.0, 3.0 Hz, 1H), 4.71 (p,  $J$  = 3.6 Hz, 1H), 3.79 (s, 3H), 0.49 (d,  $J$  = 3.8 Hz, 3H).

**$^{13}C$  NMR** (126 MHz,  $CDCl_3$ ):  $\delta$  159.91, 146.64, 135.92, 134.66, 131.00, 129.42, 127.97, 127.93,

120.77, 113.96, 55.32, -5.07.

**HRMS** (ESI)  $m/z$  ( $[M+H]^+$ ) calcd for  $C_{16}H_{19}OSi$ : 255.1200. Found: 255.1192.

**(*E*)-(4-Methoxystyryl)diphenylsilane (59)**

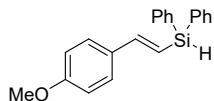

This compound was prepared according to the method B. After purification by column chromatography ( $SiO_2$ : 5% ethyl acetate in petroleum ether), the title compound was isolated in 72% yield (45.57 mg, 0.138 mmol) as a colorless oil.

**$^1H$  NMR** (500 MHz,  $CDCl_3$ ):  $\delta$  7.63–7.60 (m, 4H), 7.42–7.40 (m, 2H), 7.40–7.35 (m, 6H), 7.03 (d,  $J$  = 19.0 Hz, 1H), 6.88–6.84 (m, 2H), 6.58–6.50 (m, 1H), 5.23 (d,  $J$  = 3.3 Hz, 1H), 3.81 (s, 3H).

**$^{13}C$  NMR** (126 MHz,  $CDCl_3$ ):  $\delta$  160.08, 148.64, 135.56, 134.38, 130.45, 129.74, 128.06, 127.80, 118.49, 113.98, 54.26.

**HRMS** (ESI)  $m/z$  ( $[M+H]^+$ ) calcd for  $C_{21}H_{21}OSi$ : 317.1356. Found: 317.1352.

## Part 5. Preparation of Alkenyl Bromides

### 1. General Procedure

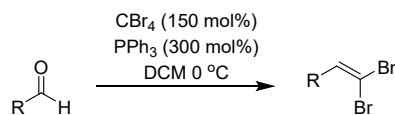

*Step 1:* To a flame-dried flask was added aldehyde (20 mmol, 100 mol%), CBr<sub>4</sub> (30 mmol, 150 mol%), and CH<sub>2</sub>Cl<sub>2</sub> (80 mL). The flask was cooled to 0 °C in an ice bath, at which point a solution of PPh<sub>3</sub> (60 mmol, 300 mol%) in CH<sub>2</sub>Cl<sub>2</sub> (70 mL) was added dropwise via addition funnel over 30 min. The solution was stirred at 0 °C under N<sub>2</sub> for 1 h. About half of the volume of CH<sub>2</sub>Cl<sub>2</sub> was removed under reduced pressure. Pentane (100 mL) was added, and triphenylphosphine oxide (TPPO) precipitated out. After filtration and evaporation of the solvent, the residue was dissolved in pentane (50 mL) which led to further precipitation of TPPO. Filtration and evaporation of the solvent afforded the crude dibromide which was directly used for the next step.

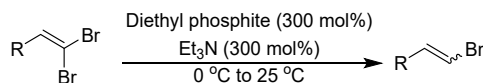

*Step 2:* To a solution of the crude dibromide (~ 20.0 mmol, 100 mol%) and NEt<sub>3</sub> (60 mmol, 300 mol%) in DMF (20 mL) was added dimethyl phosphonate (60.0 mmol, 300 mol%). The solution was stirred over night at room temperature. Water (60 mL) was added to the mixture, which was extracted with pentane (2 × 100 mL). The combined organic phases were washed with an aqueous solution of HCl (1 M, 55 mL) and dried over Na<sub>2</sub>SO<sub>4</sub>, filtered, and concentrated. The crude material was purified by flash chromatography.

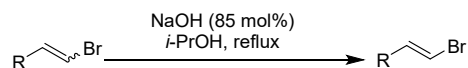

*Step 3:* The crude product (~20.0 mmol, 100 mol %) from the previous step was dissolved in *i*-PrOH (30 mL). Solid NaOH (17.0 mmol, 85 mol%) was added and the mixture was heated to reflux for 1.5 hours. The reaction mixture was cooled to room temperature, diluted with pentane (100 mL), and partitioned with distilled H<sub>2</sub>O (2 × 100 mL). The organic phase was collected, and washed with an aqueous solution of HCl (1 M, 75 mL), dried over Na<sub>2</sub>SO<sub>4</sub>. The solvent was removed under

reduced pressure. The crude material was purified by flash chromatography.

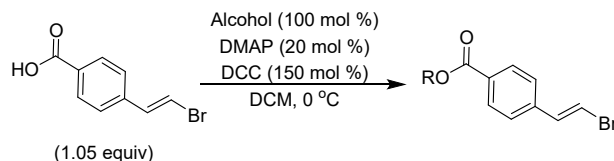

**Step 4:** To a flame-dried flask was added acid (3.15 mmol, 105 mol %), DMAP (0.6 mmol, 20 mol %), DCC (4.5 mmol, 150 mol %), and CH<sub>2</sub>Cl<sub>2</sub> (15 mL). The flask was cooled to 0 °C, at which point a solution of alcohol (3.0 mmol, 100 mol %) in CH<sub>2</sub>Cl<sub>2</sub> (15 mL) was added dropwise via addition funnel over 30 min. The solution was stirred at 0 °C under N<sub>2</sub> over night. After the reaction was finished the CH<sub>2</sub>Cl<sub>2</sub> was removed under reduced pressure. And The crude residue was purified by silicagel chromatography (hexanes) to give the target compound.

### 3,7-Dimethyloct-6-en-1-yl(*E*)-4-(2-bromovinyl)benzoate

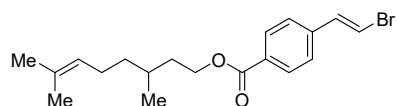

The title compound was prepared following the general procedure using (*E*)-4-(2-bromovinyl)benzoic acid (715 mg, 3.15 mmol, 1.05 equiv), citronellol (469 mg, 3.0 mmol, 1.0 equiv). After purification by column chromatography (SiO<sub>2</sub>: 5% ethyl acetate in petroleum ether), the title compound was isolated in 90% yield (990 mg) as a pale yellow liquid.

**<sup>1</sup>H NMR** (500 MHz, CDCl<sub>3</sub>): δ 8.01–7.97 (m, 2H), 7.38–7.32 (m, 2H), 7.14 (d, *J* = 14.0 Hz, 1H), 6.90 (s, 1H), 5.10 (tt, *J* = 7.1, 1.4 Hz, 1H), 4.39–4.31 (m, 2H), 2.01 (dh, *J* = 14.8, 7.4 Hz, 2H), 1.84–1.77 (m, 1H), 1.67 (s, 4H), 1.61–1.55 (m, 4H), 1.44–1.37 (m, 1H), 1.27–1.21 (m, 1H), 0.97 (d, *J* = 6.6 Hz, 3H).

**<sup>13</sup>C NMR** (126 MHz, CDCl<sub>3</sub>): δ 166.18, 139.97, 136.39, 131.39, 130.08, 130.05, 125.93, 124.54, 109.30, 63.62, 36.97, 35.49, 29.56, 25.71, 25.39, 19.51, 17.67.

**(S)-(4-(Prop-1-en-2-yl)cyclohex-1-en-1-yl)methyl (E)-4-(2-bromovinyl)benzoate**

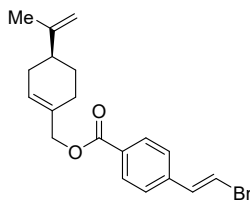

The title compound was prepared following the general procedure using (E)-4-(2-bromovinyl)benzoic acid (715 mg, 3.15 mmol, 1.05 equiv), perilla alcohol (476 mg, 3.0 mmol, 1.0 equiv). After purification by column chromatography (SiO<sub>2</sub>: 5% ethyl acetate in petroleum ether), the title compound was isolated in 87% yield (939 mg) as a pale yellow liquid.

**<sup>1</sup>H NMR** (500 MHz, CDCl<sub>3</sub>):  $\delta$  8.02–7.99 (m, 2H), 7.37–7.33 (m, 2H), 7.13 (d,  $J$  = 14.0 Hz, 1H), 6.91 (d,  $J$  = 14.0 Hz, 1H), 5.84 (s, 1H), 4.75–4.70 (m, 4H), 2.22–2.16 (m, 4H), 2.03–1.96 (m, 1H), 1.90–1.84 (m, 1H), 1.74 (s, 3H), 1.53 (ddt,  $J$  = 16.9, 12.7, 7.9 Hz, 1H).

**<sup>13</sup>C NMR** (126 MHz, CDCl<sub>3</sub>):  $\delta$  165.97, 149.53, 140.04, 136.37, 132.59, 130.16, 129.90, 125.94, 125.79, 109.37, 108.83, 68.95, 40.83, 30.47, 27.32, 26.46, 20.76.

## Part 6. Scale-up Experiments and Synthetic Applications

### 1. Scale-up Experiments

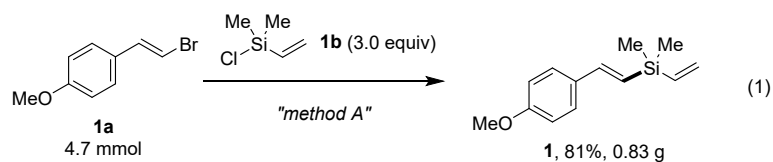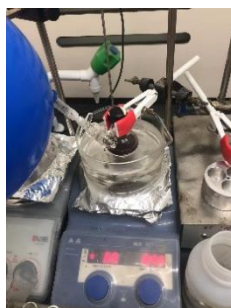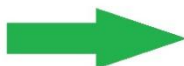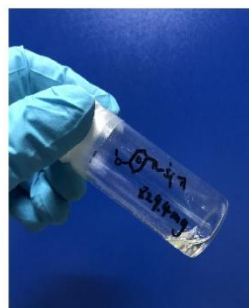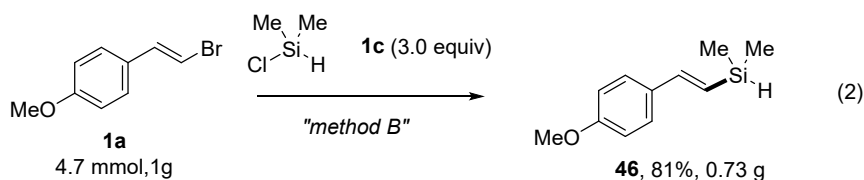

### 2. Hydration Reaction<sup>4</sup>

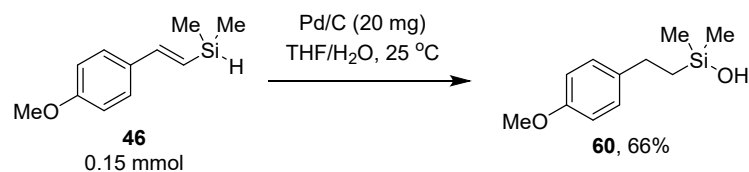

To a reaction tube equipped with a magnetic stir bar was added **46** (28.85 mg, 0.15 mmol), Pd/C (20 mg), and THF (1.6 mL), followed by addition of H<sub>2</sub>O (0.3 mL). The reaction mixture was stirred overnight at room temperature. The reaction was quenched with water (10.0 mL) and extracted with ethyl acetate (3 × 15.0 mL). The combined organic layers was washed with water (15.0 mL), brine (20.0 mL), dried over anhydrous Na<sub>2</sub>SO<sub>4</sub>, and concentrated under reduced pressure. The residue was purified by flash chromatography on silica gel to give compound **60** (20.82 mg, 66%, colorless oil).



### 3. Cross-coupling Reaction<sup>4</sup>

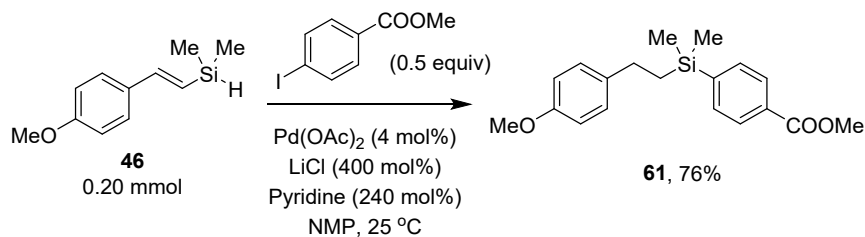

The procedure was conducted in an argon-filled glove box. To a reaction tube equipped with a magnetic stir bar was added methyl 4-iodobenzoate (26.21 mg, 0.10 mmol), LiCl (16.95 mg, 0.4 mmol), **46** (40.4 mg, 0.2 mmol), Pd(OAc)<sub>2</sub> (0.9 mg, 0.004 mmol), NMP (0.8 mL), and Pyridine (18.95 mg, 0.24 mmol). The reaction tube was sealed and removed from the glove box. The reaction mixture was stirred at room temperature for 24 h. After purification by column chromatography (SiO<sub>2</sub>: 5% ethyl acetate in petroleum ether), the title compound **61** was isolated in 76% yield (49.93 mg, 0.152 mmol) as a colorless oil.

## Part 7. Mechanism Experiments

### 1. Control Experiments

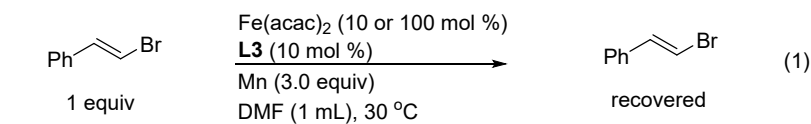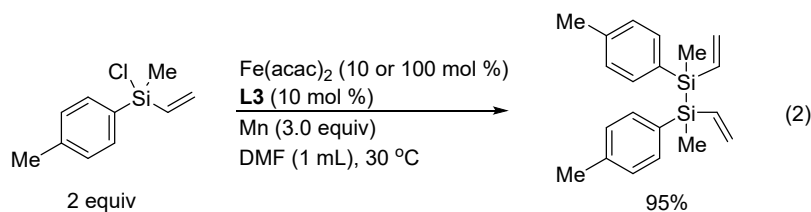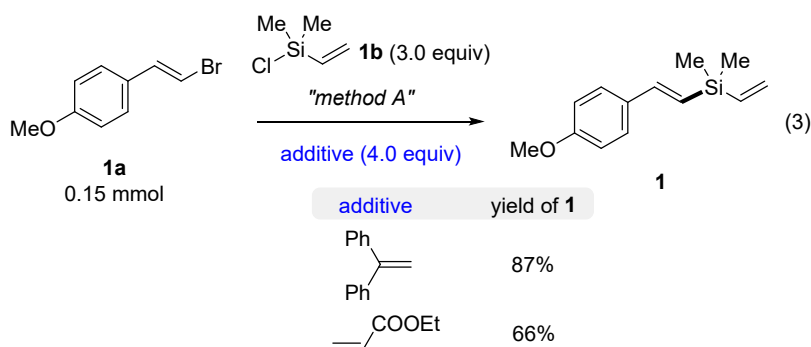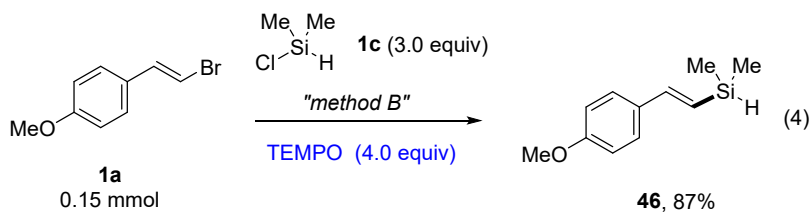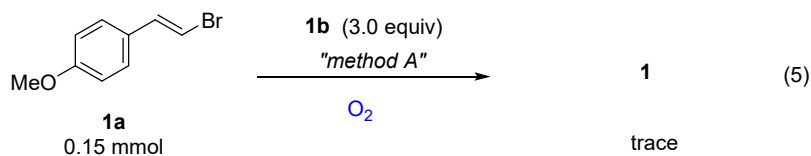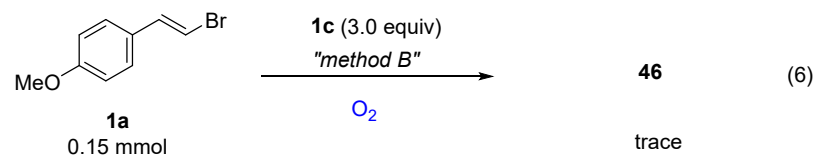

## 2. Stoichiometric Reaction of Fe(acac)<sub>3</sub> with Vinyl Bromide and Chlorosilanes

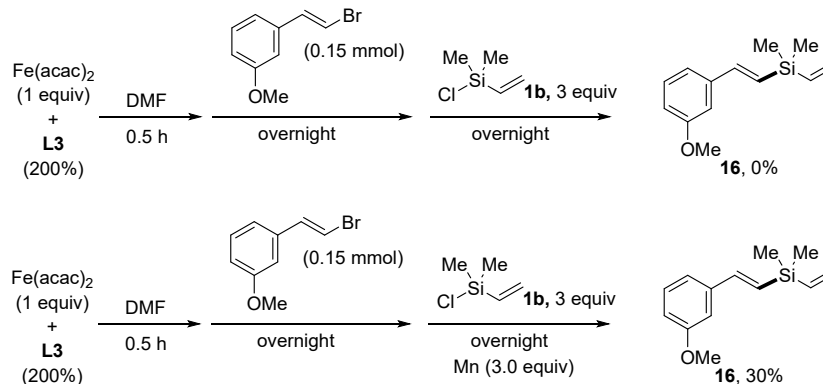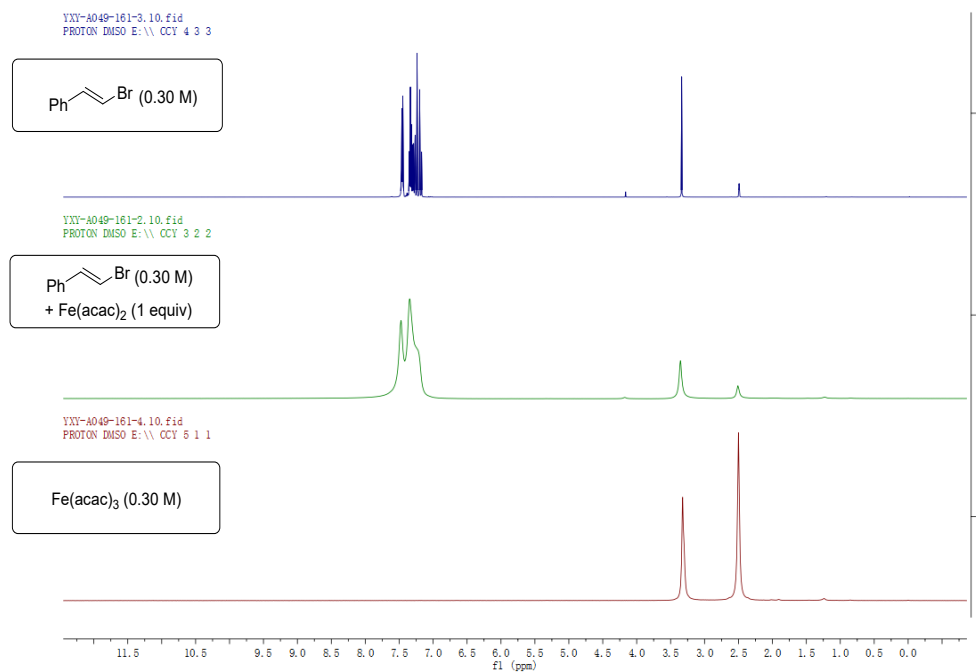

**Figure S1.** <sup>1</sup>H NMR (DMSO-*d*<sub>6</sub>) spectra of the reaction of (*E*)-(2-bromovinyl)benzene with Fe(acac)<sub>3</sub>.

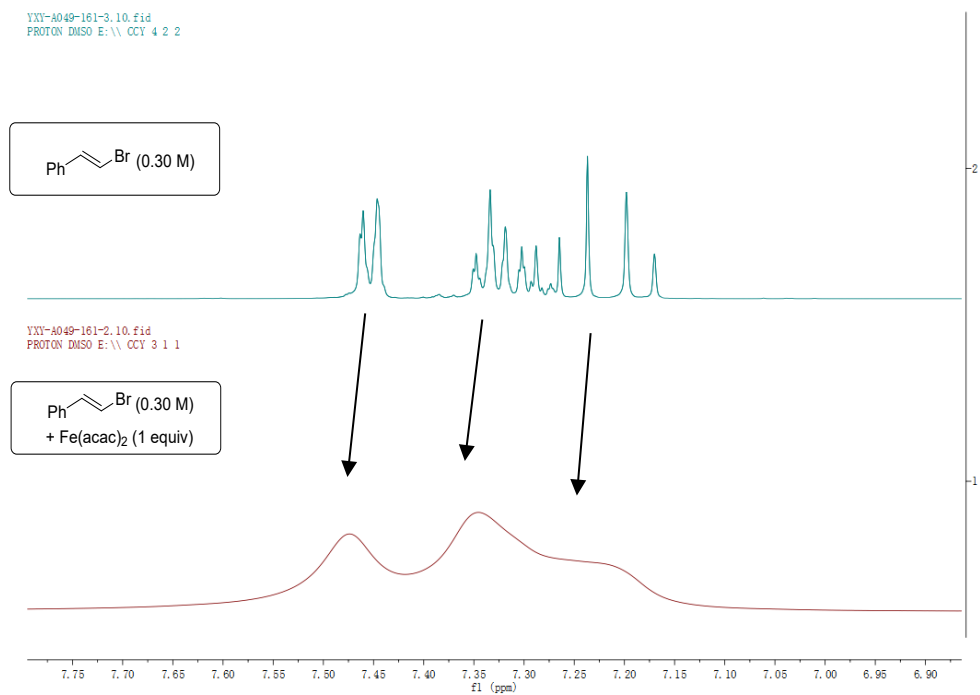

**Figure S2.** <sup>1</sup>H NMR (DMSO-*d*<sub>6</sub>) partial spectra of the reaction of (*E*)-(2-bromovinyl)benzene with Fe(acac)<sub>2</sub>.

## II. Spectral Data for New Compounds

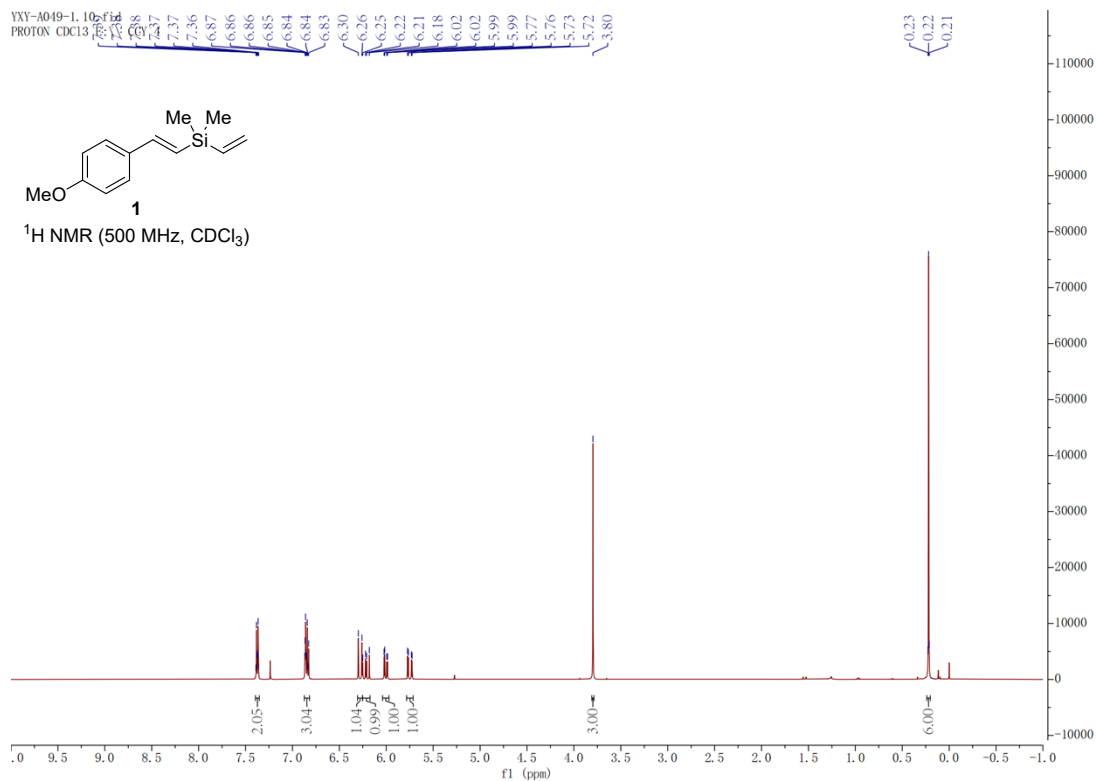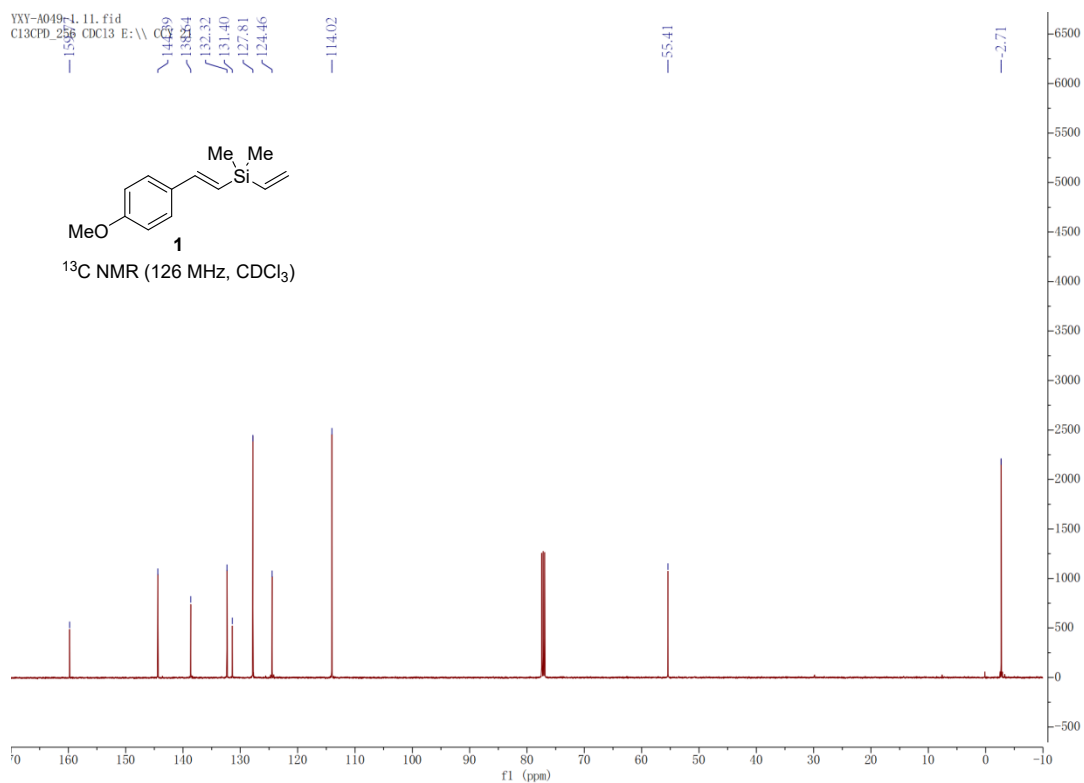

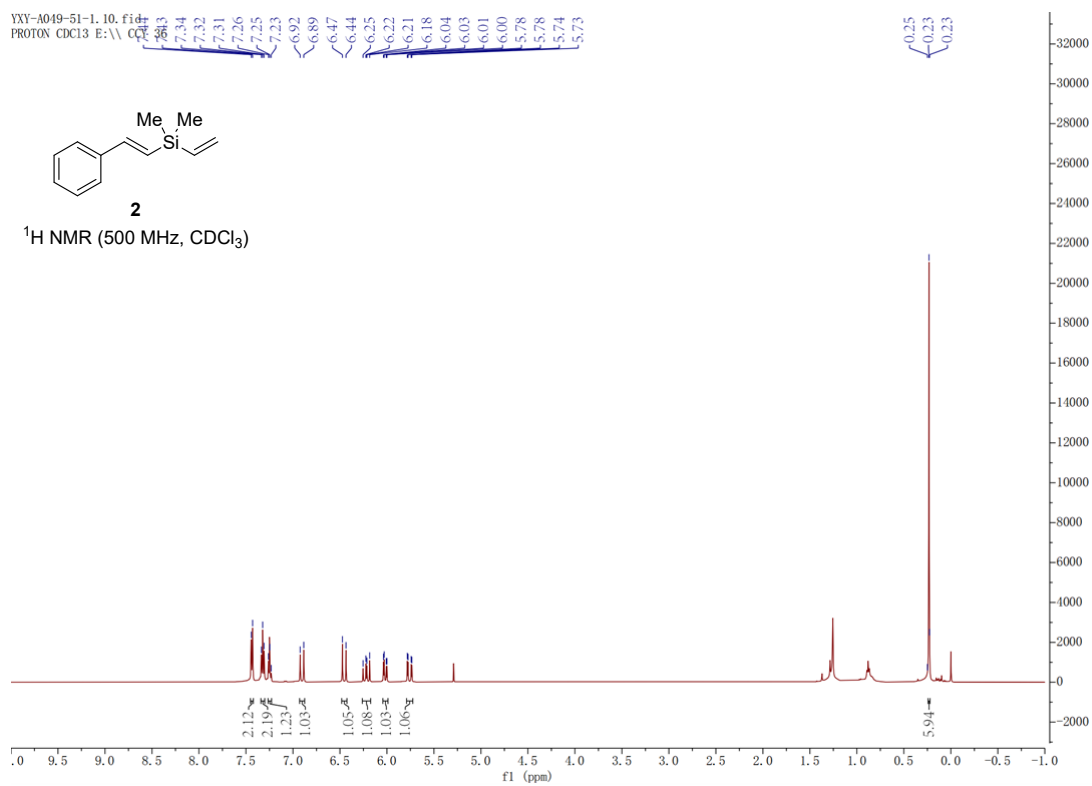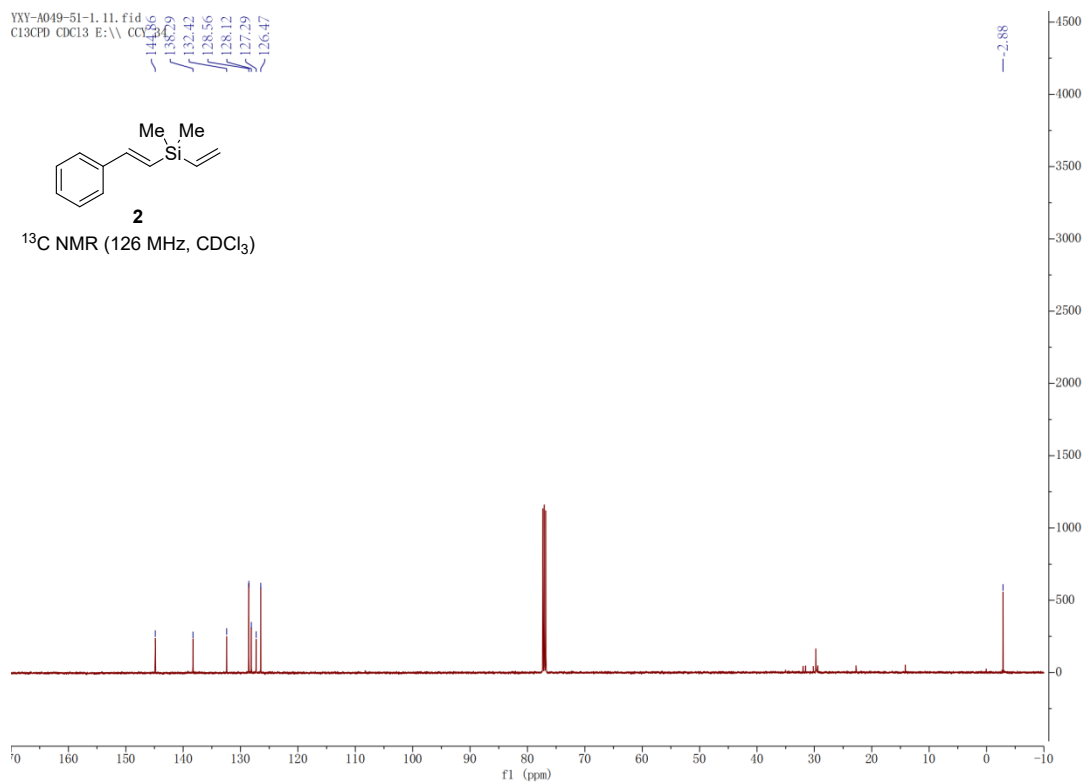

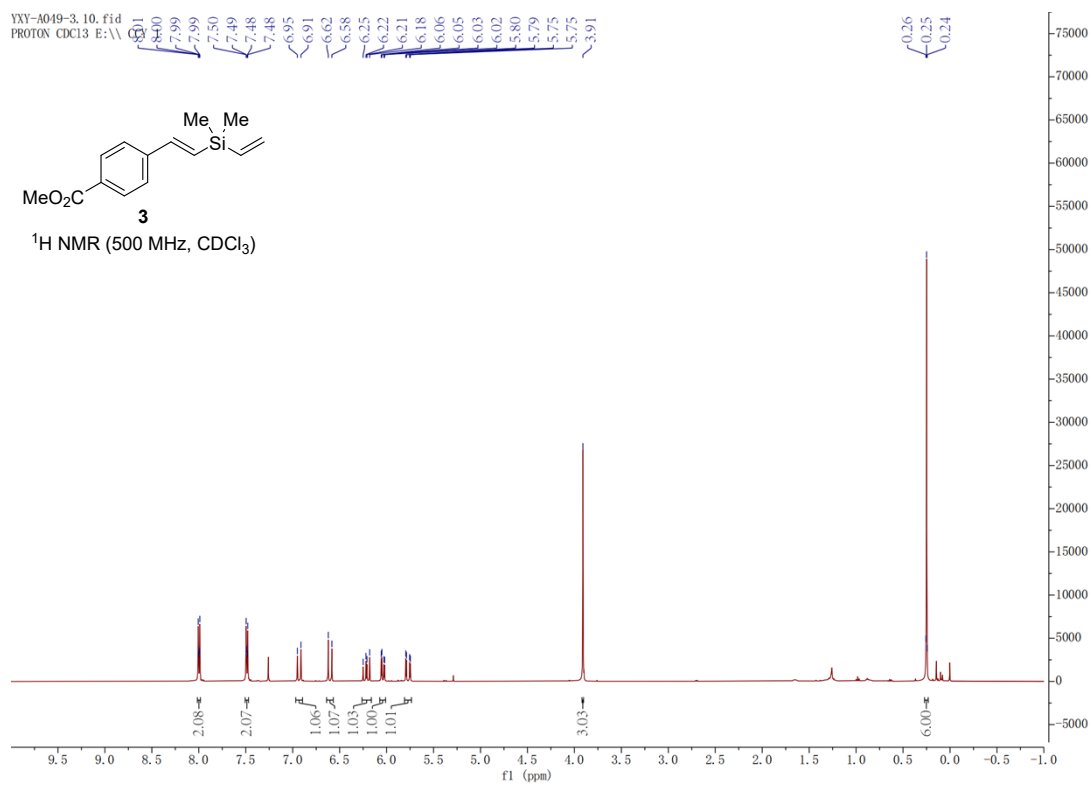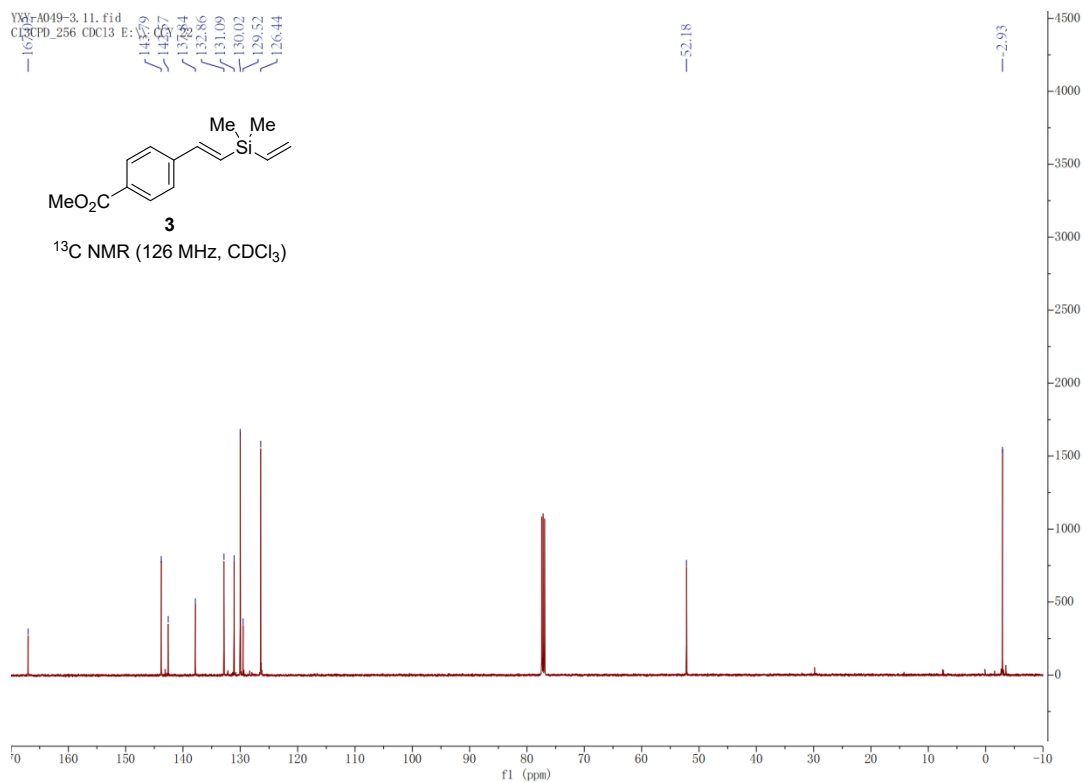

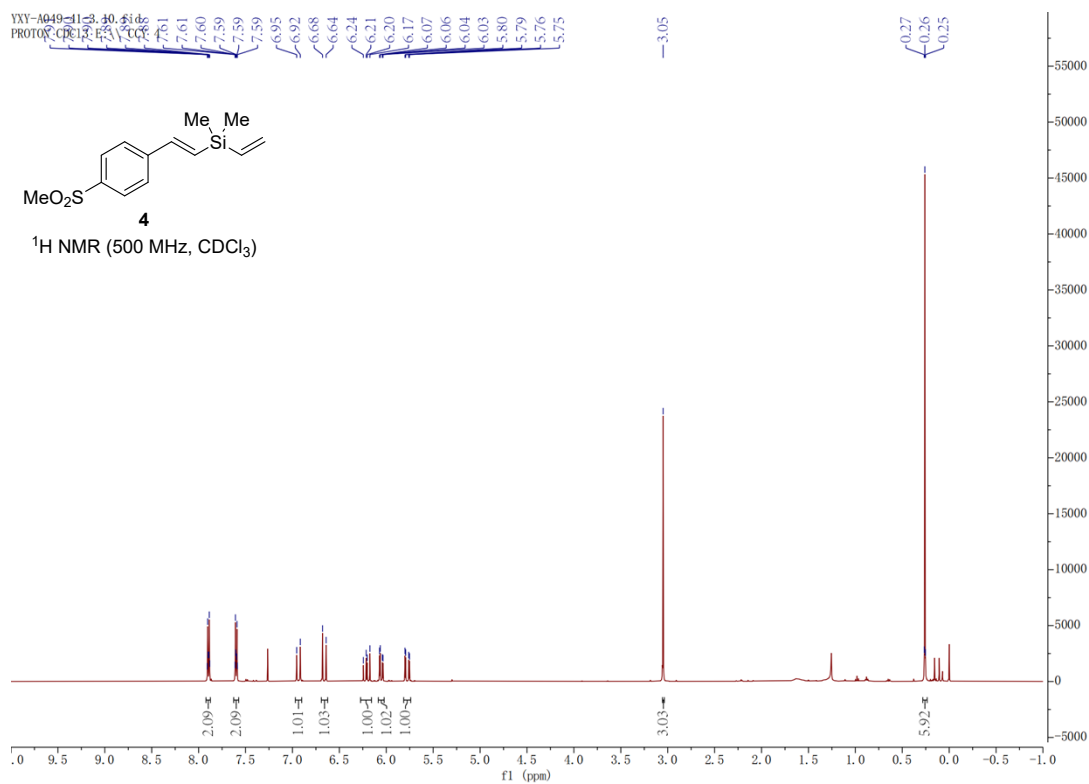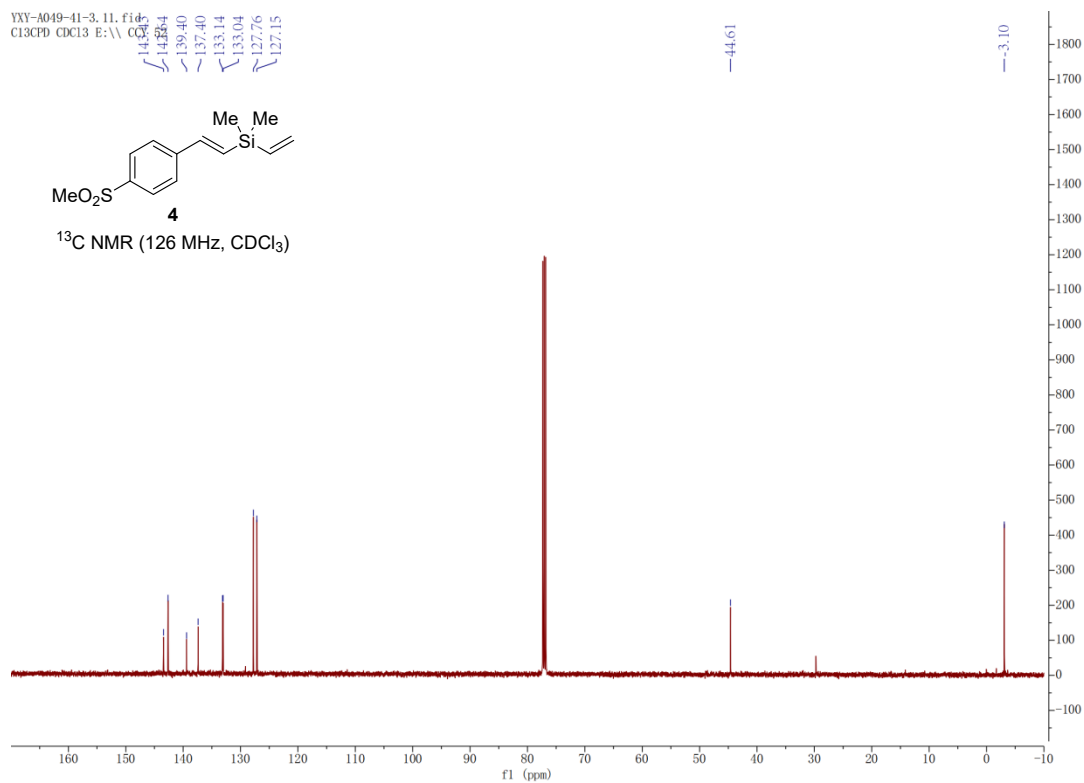



YXY-A049-5.10.fid  
 PROTON CDCl3 E:\ CCY 2

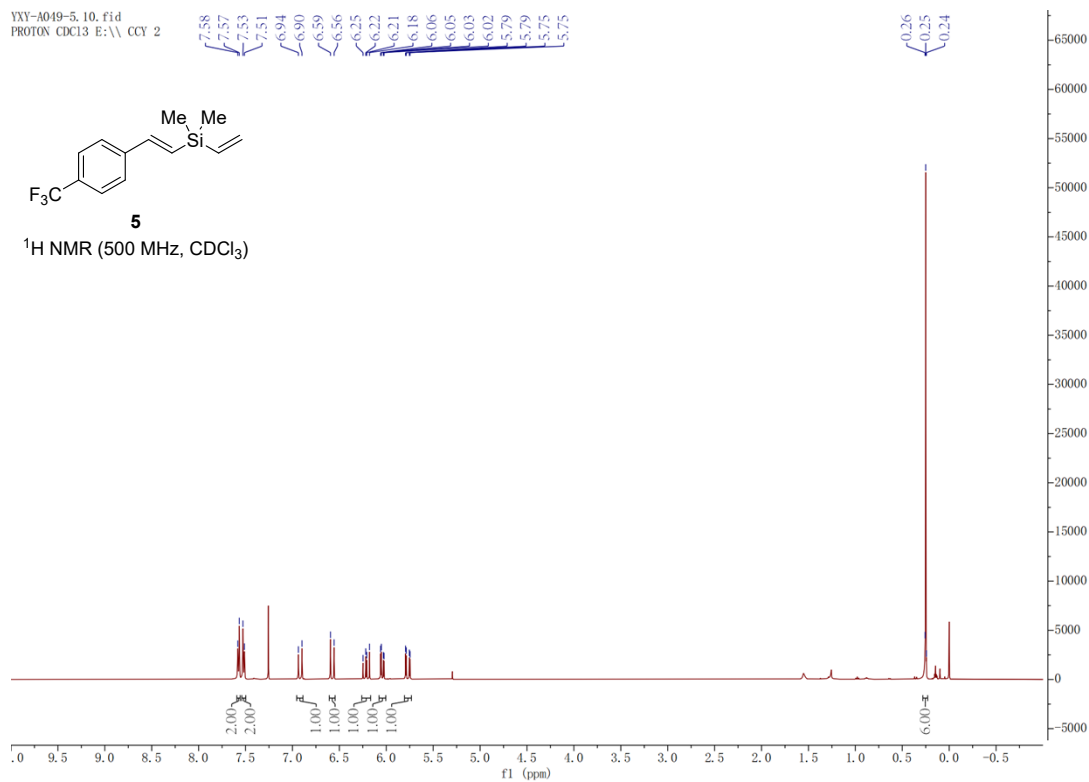

A049-63-1.1.fid  
 C13CPD CDCl3 (D:\20220630)

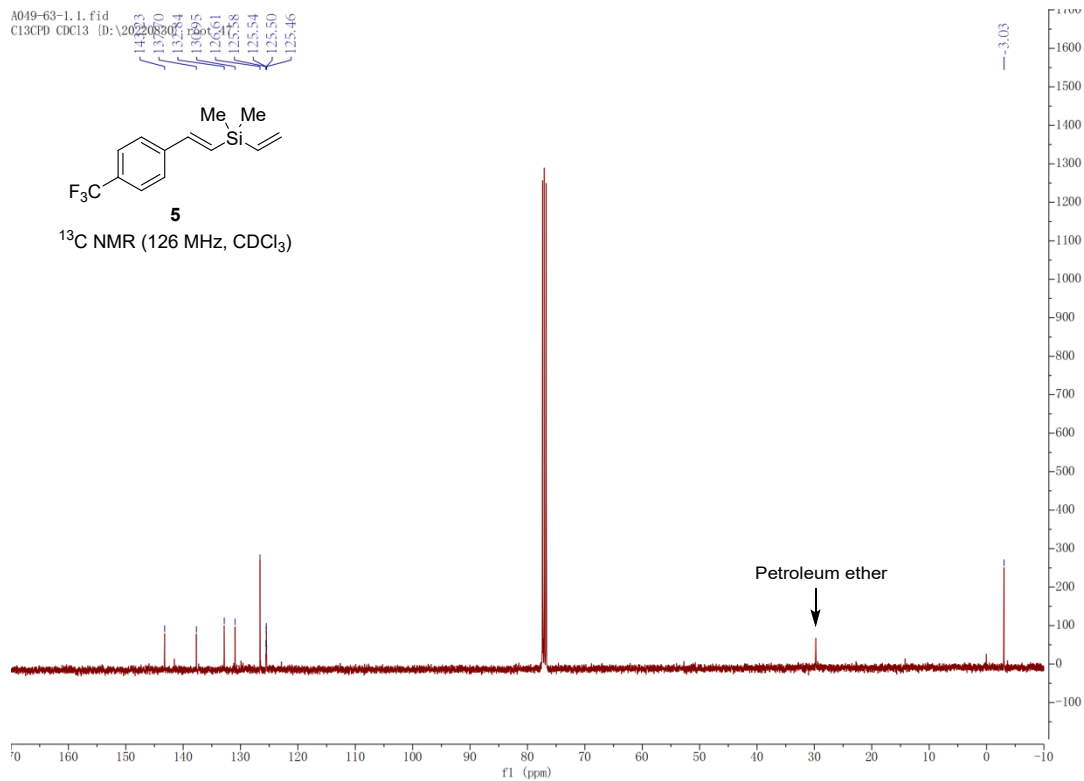

YXY-A049-5.11.fid  
F19CP0 CDCl3 E:\ CCY 18

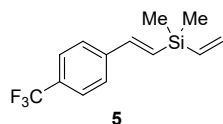

$^{19}\text{F}$  NMR (471 MHz,  $\text{CDCl}_3$ )

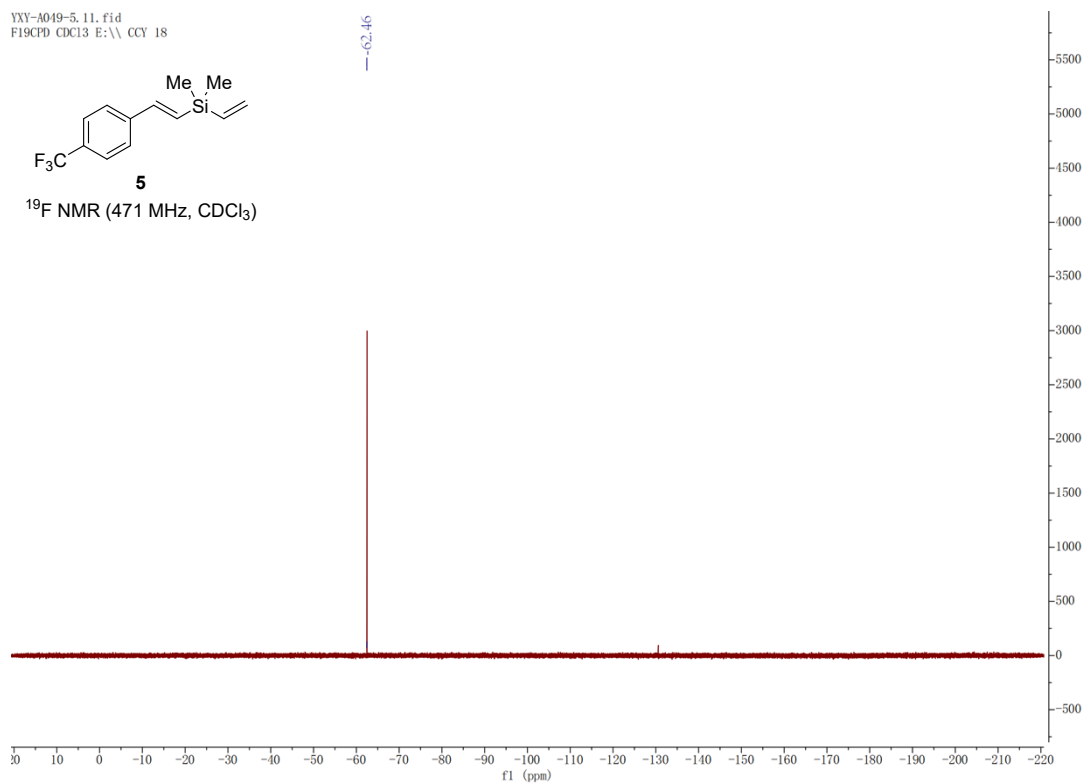

$$\begin{matrix} & 0.24 \\ & 0.24 \\ & 0.23 \end{matrix}$$
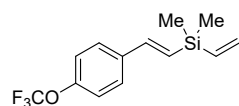

6

<sup>1</sup>H NMR (500 MHz, CDCl<sub>3</sub>)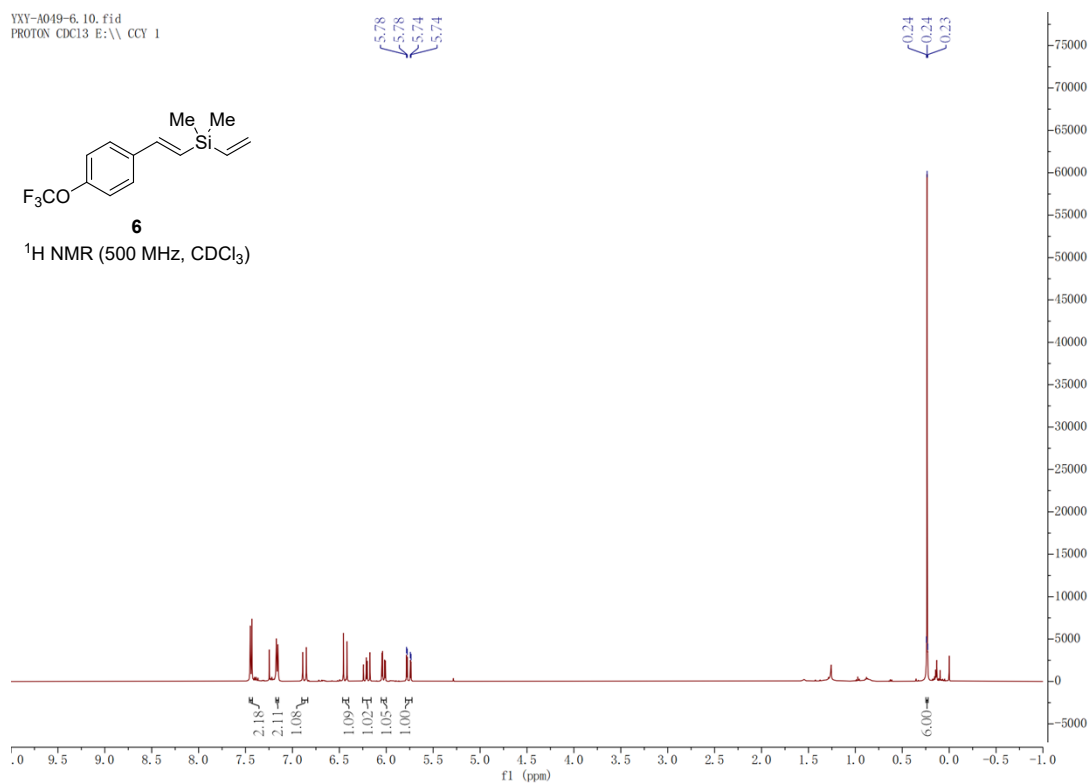

YXY-A049-6. 11. fid  
C13CPD\_256 CDC13

d  
E

|   |        |
|---|--------|
| — | 149.93 |
| — | 143.29 |
| — | 138.95 |
| — | 137.34 |
| — | 132.75 |
| — | 130.48 |
| — | 128.91 |
| — | 127.81 |
| — | 121.12 |

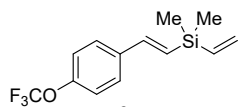

6

<sup>13</sup>C NMR (126 MHz, CDCl<sub>3</sub>)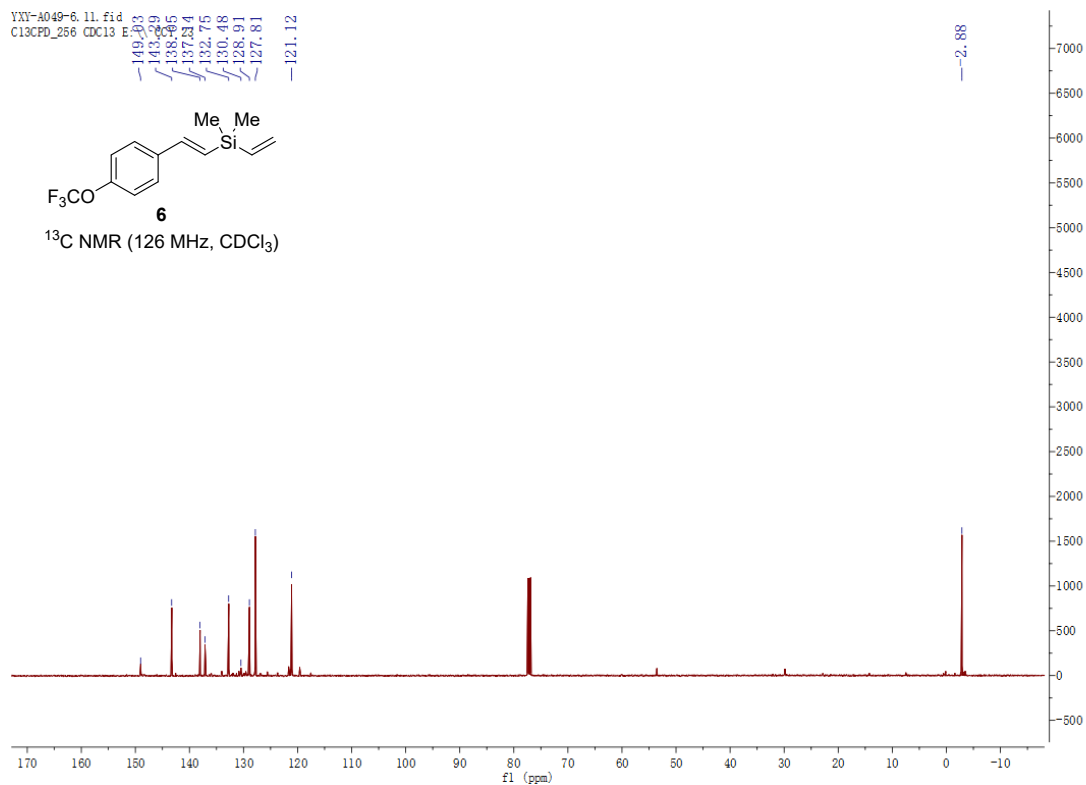

YXY-A049-6.11.fid  
F19CP0 CDCl3 E:\\ CCY 19

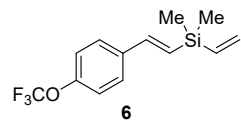

$^{19}\text{F}$  NMR (471 MHz,  $\text{CDCl}_3$ )

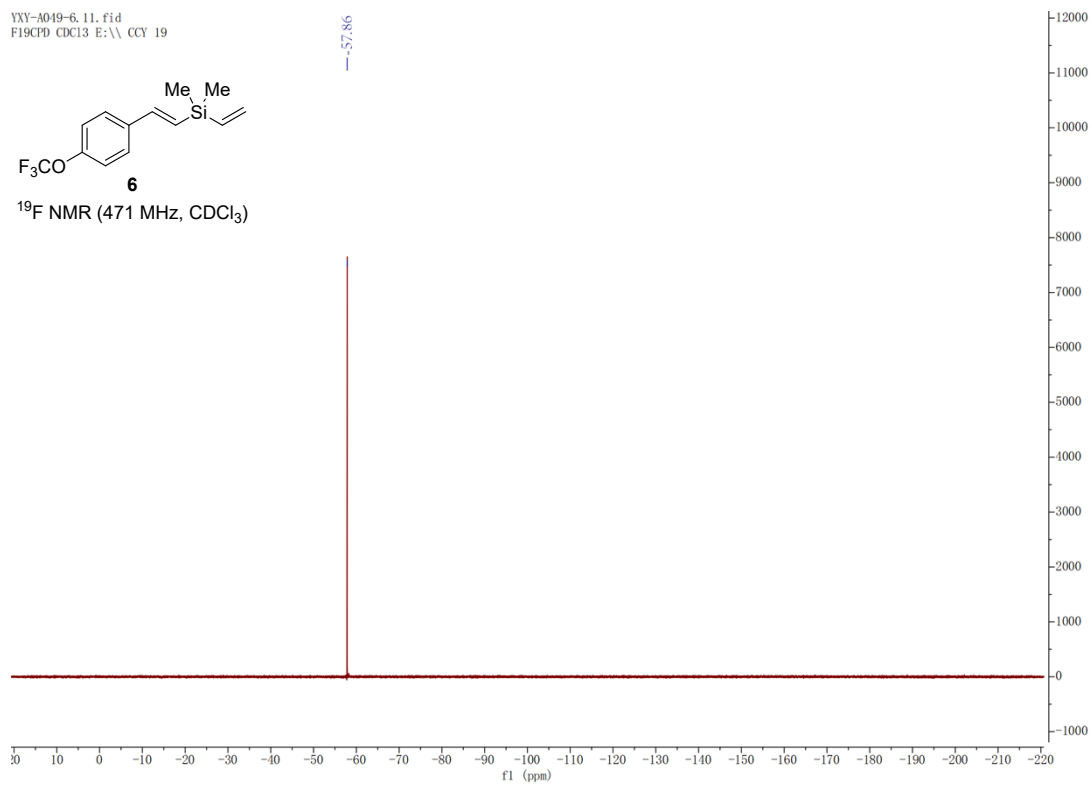

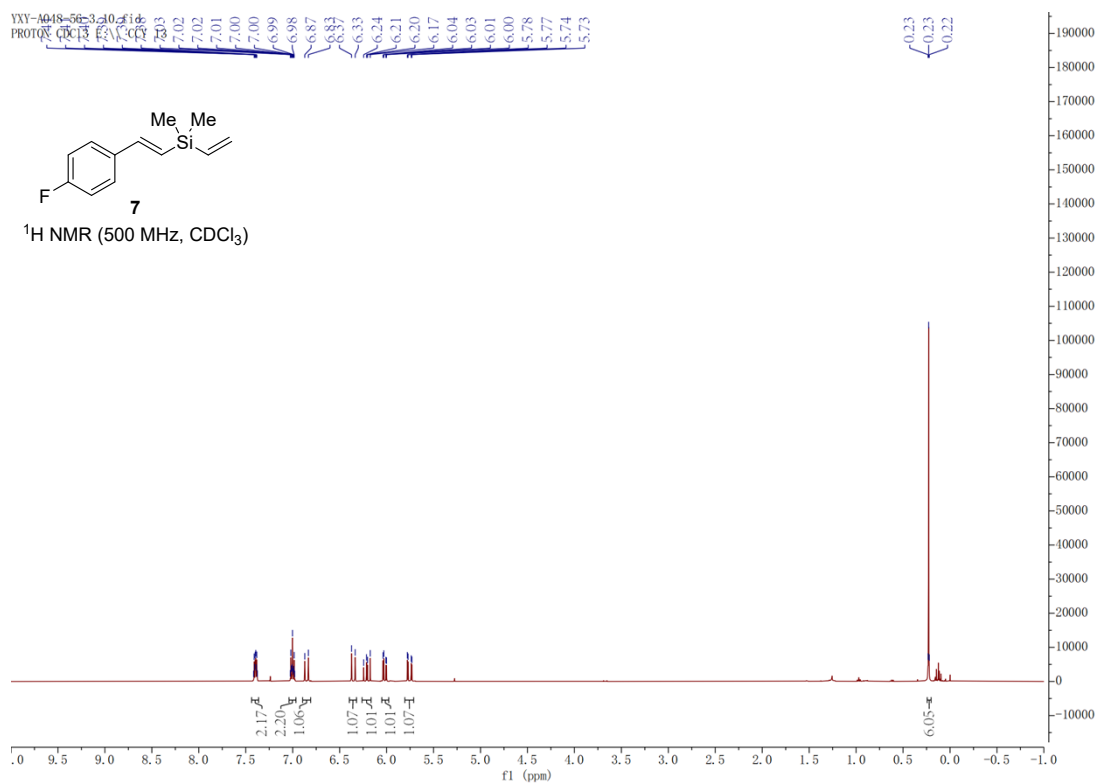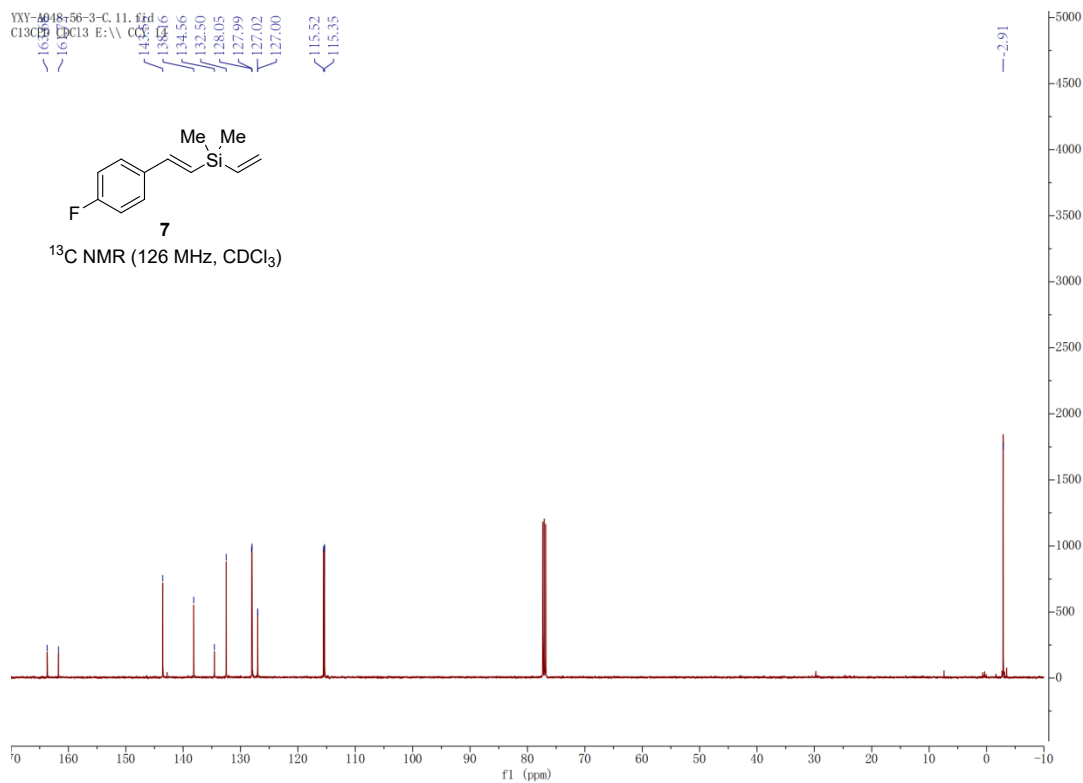

YXY-A049-7.11.fid  
F19CPD CDCl3 E:\\ CCY 17

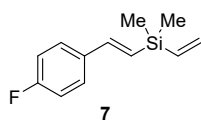

$^{19}\text{F}$  NMR (471 MHz,  $\text{CDCl}_3$ )

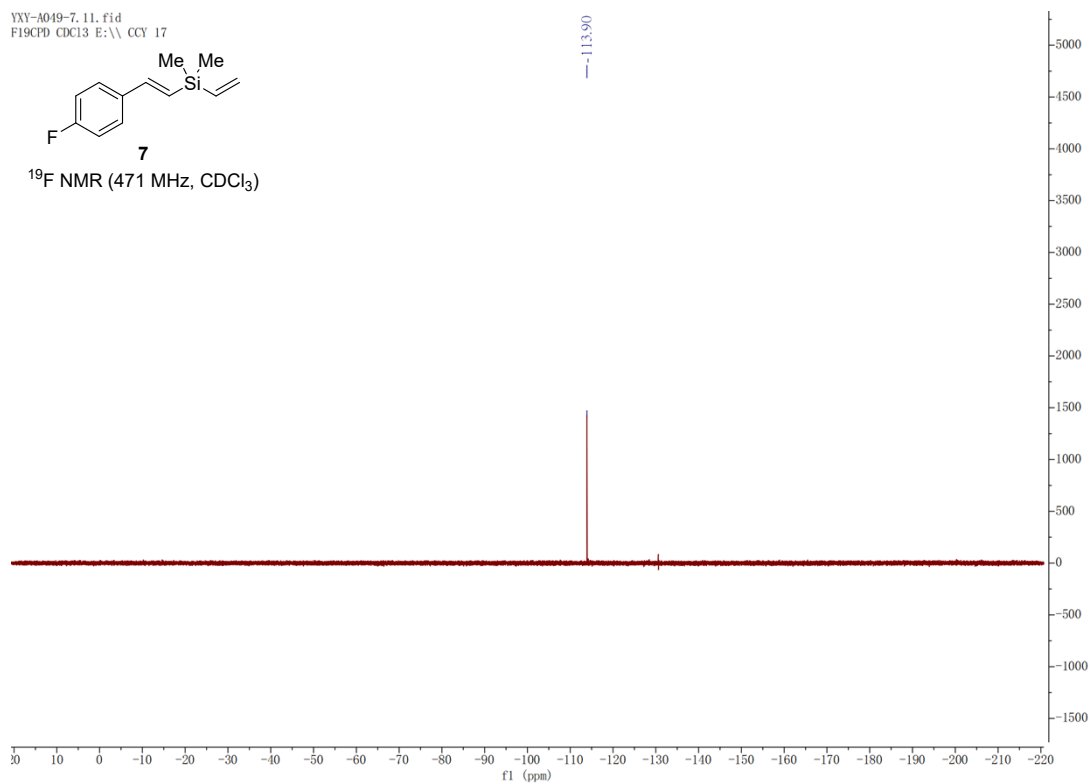

YXY-A048-63-2.10.fid  
 PROTON CDCl3 E:\ CCY 2

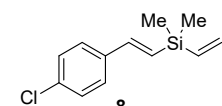

<sup>1</sup>H NMR (500 MHz, CDCl<sub>3</sub>)

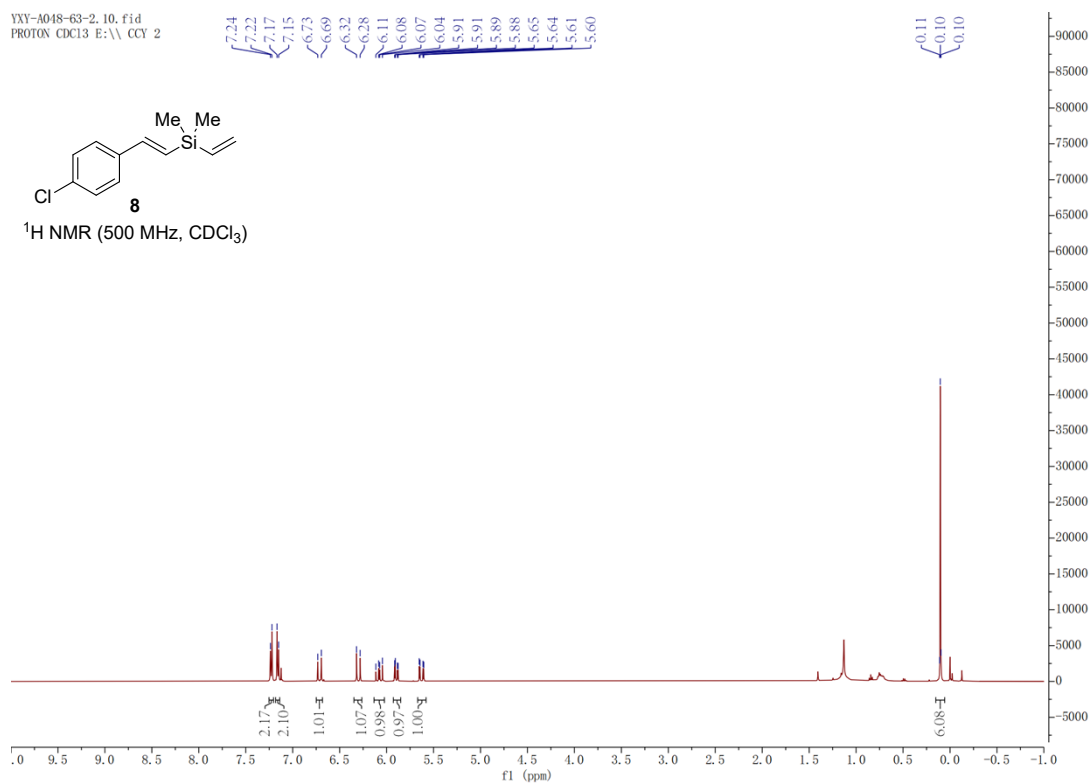

YXY-A049-8.11.fid  
 C13CPD\_256 CDCl3 E:\

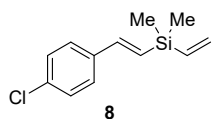

<sup>13</sup>C NMR (126 MHz, CDCl<sub>3</sub>)

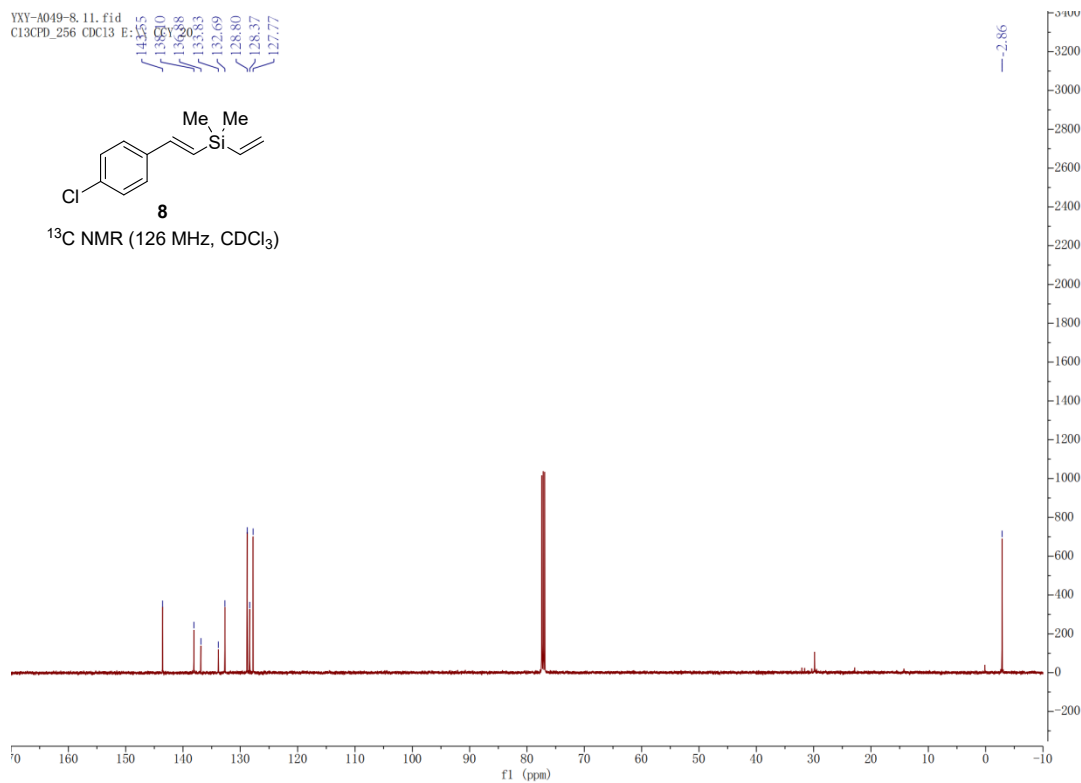

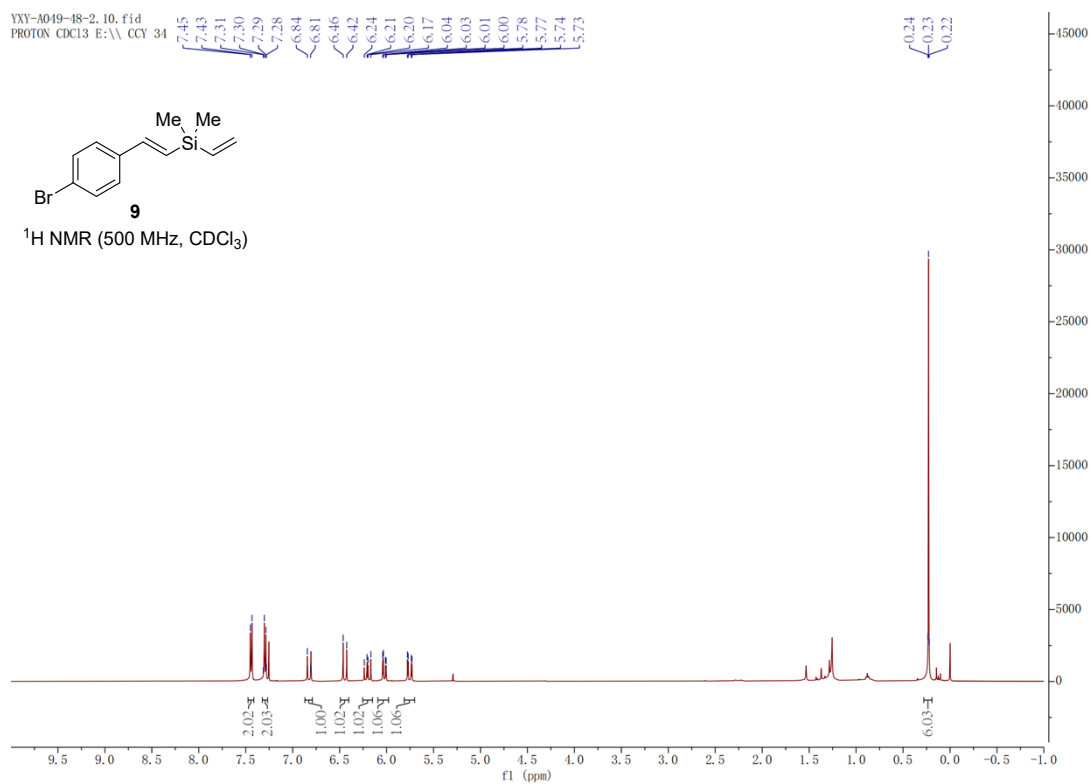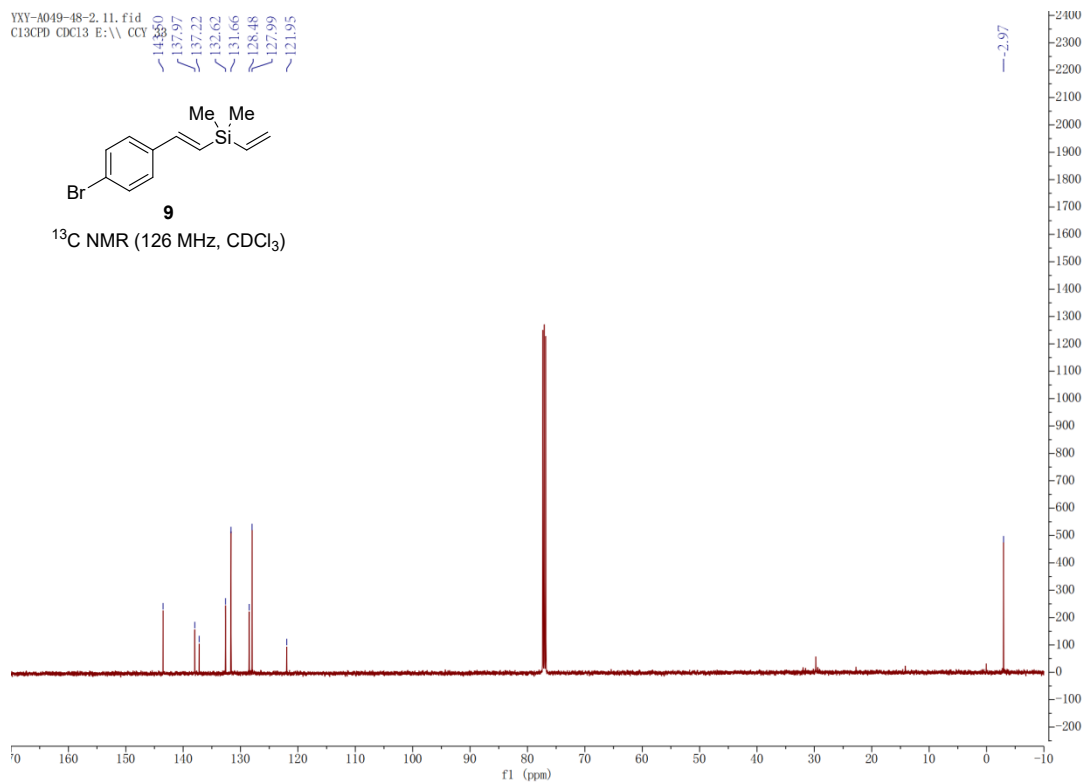



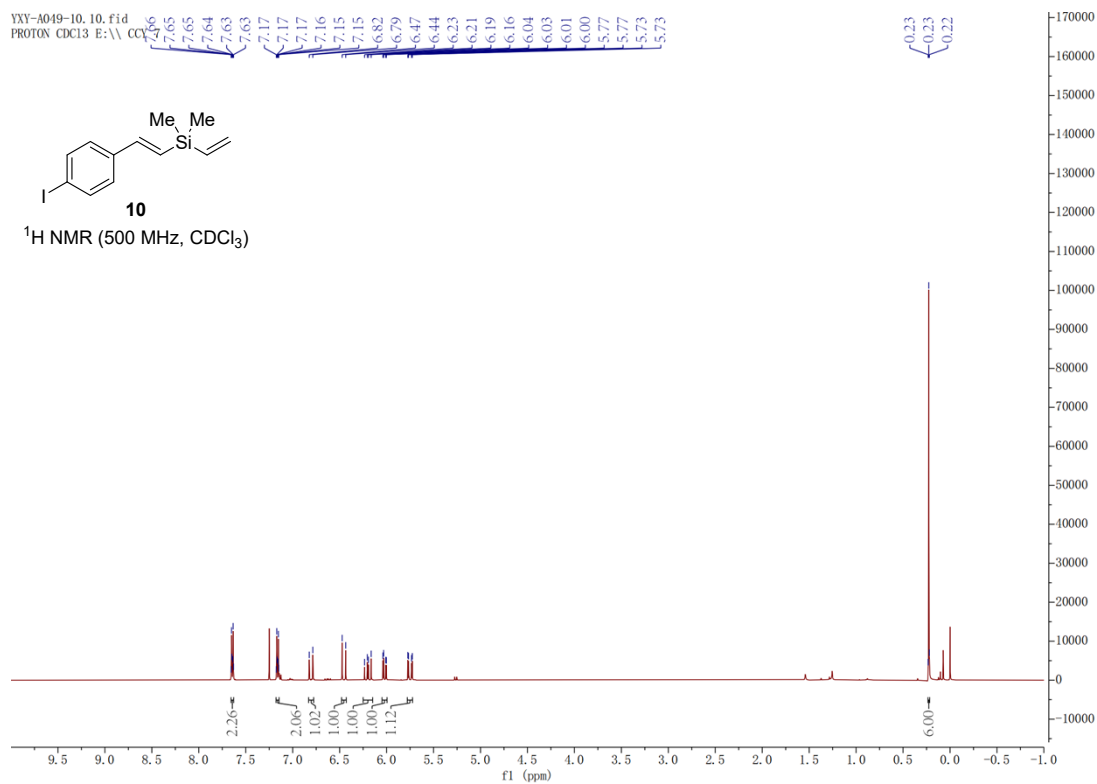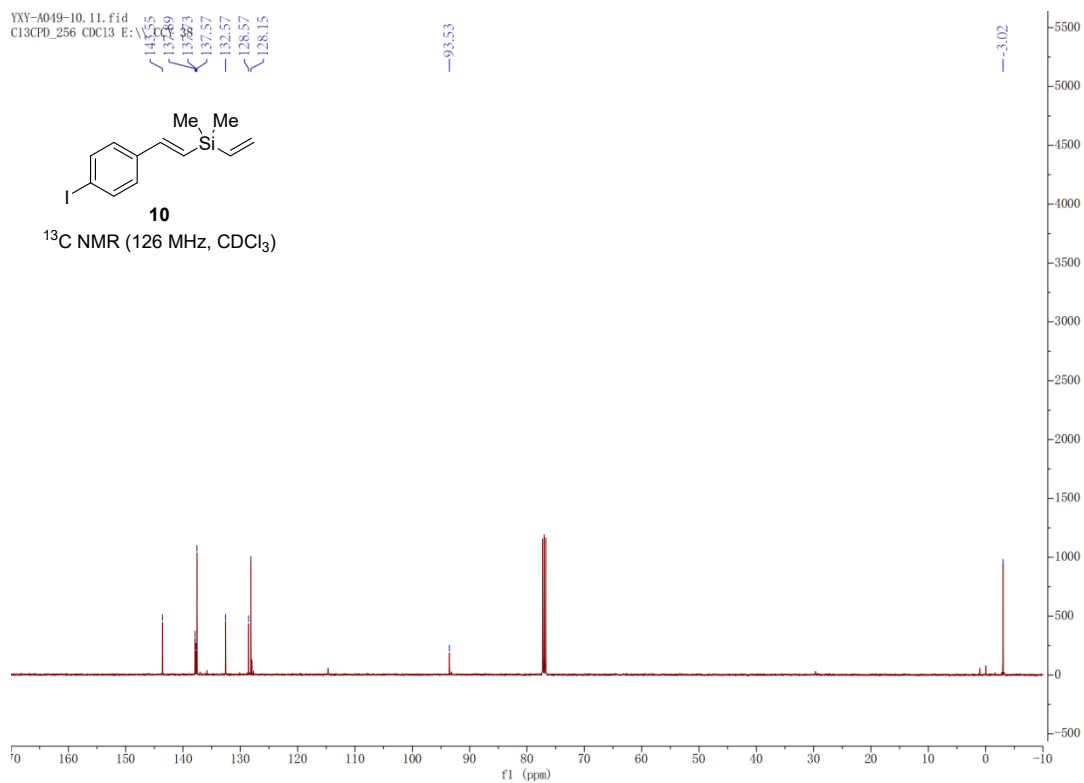

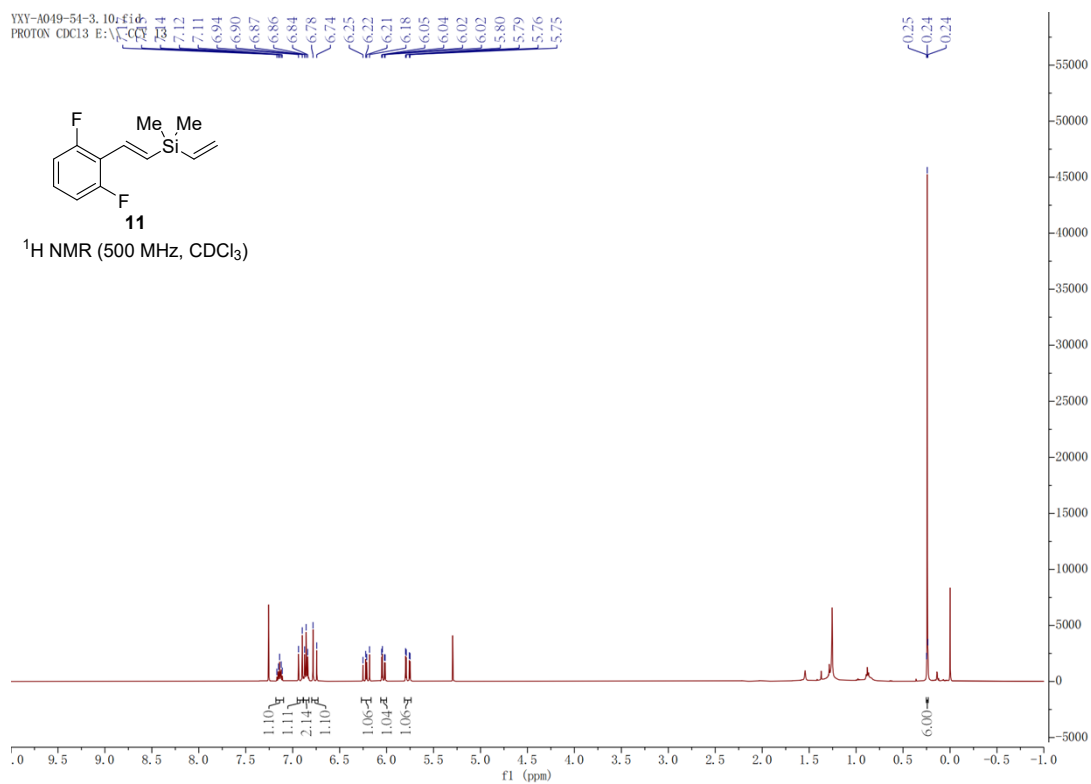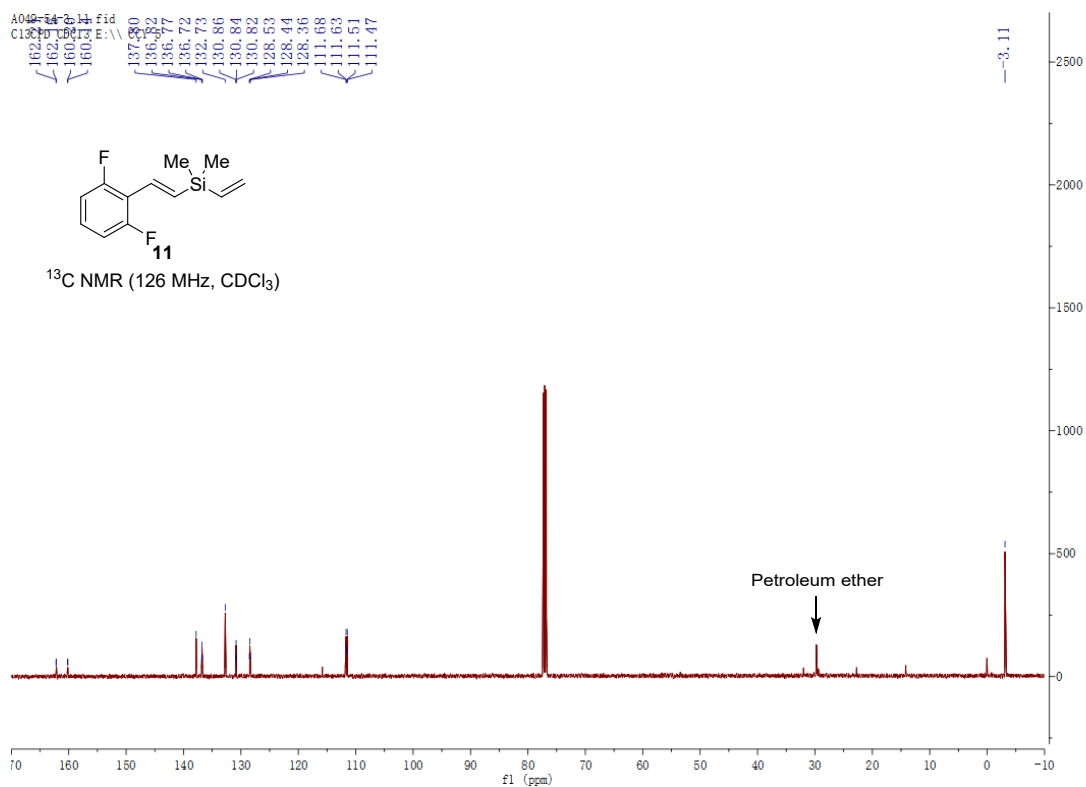

YXY-A049-11.11.fid  
F19CP0 CDCl3 E:\\ CCY 21

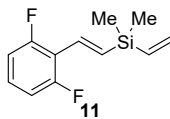

<sup>19</sup>F NMR (471 MHz, CDCl<sub>3</sub>)

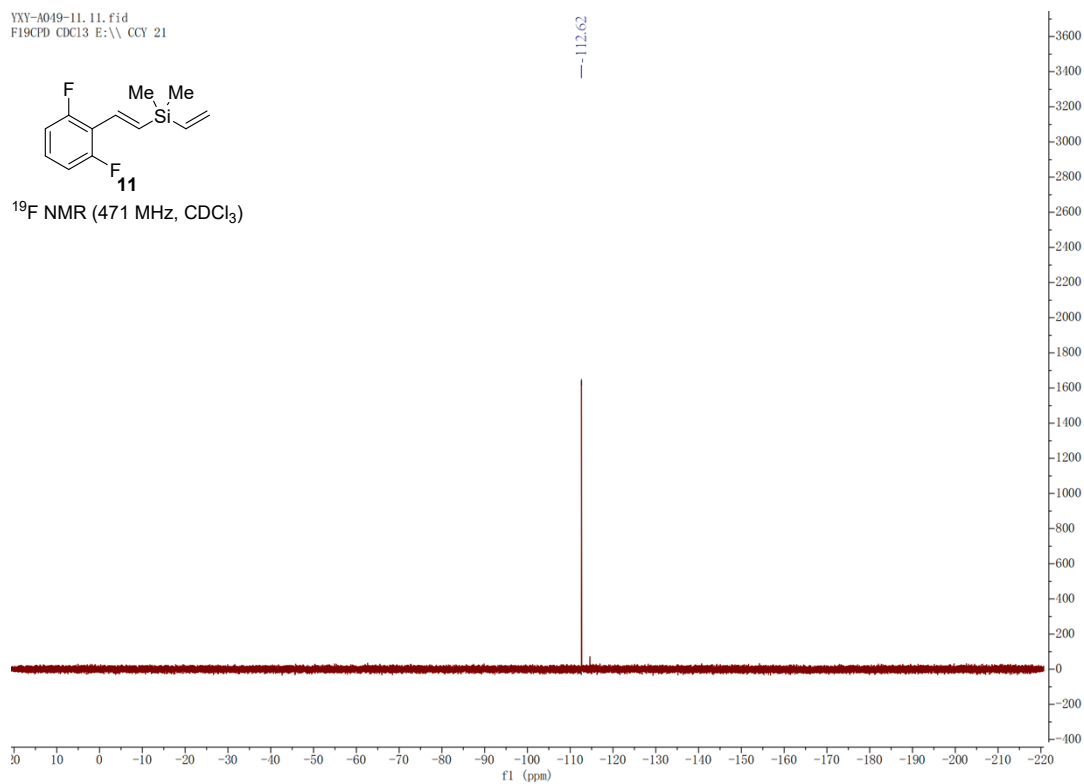

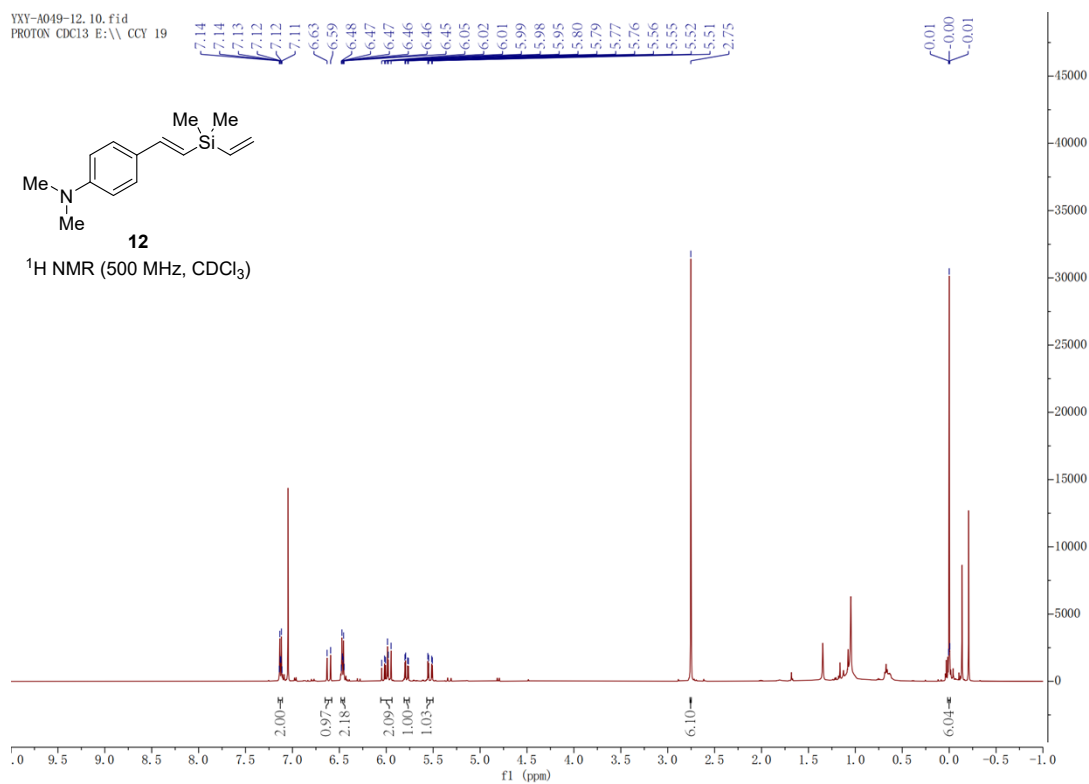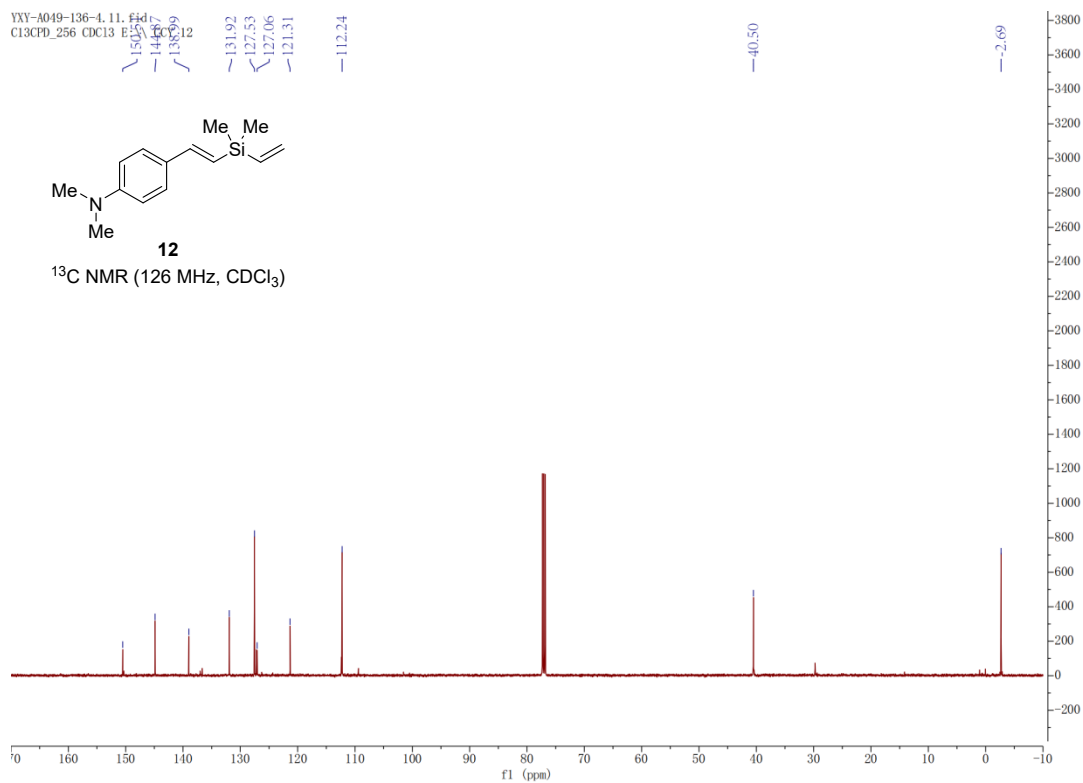

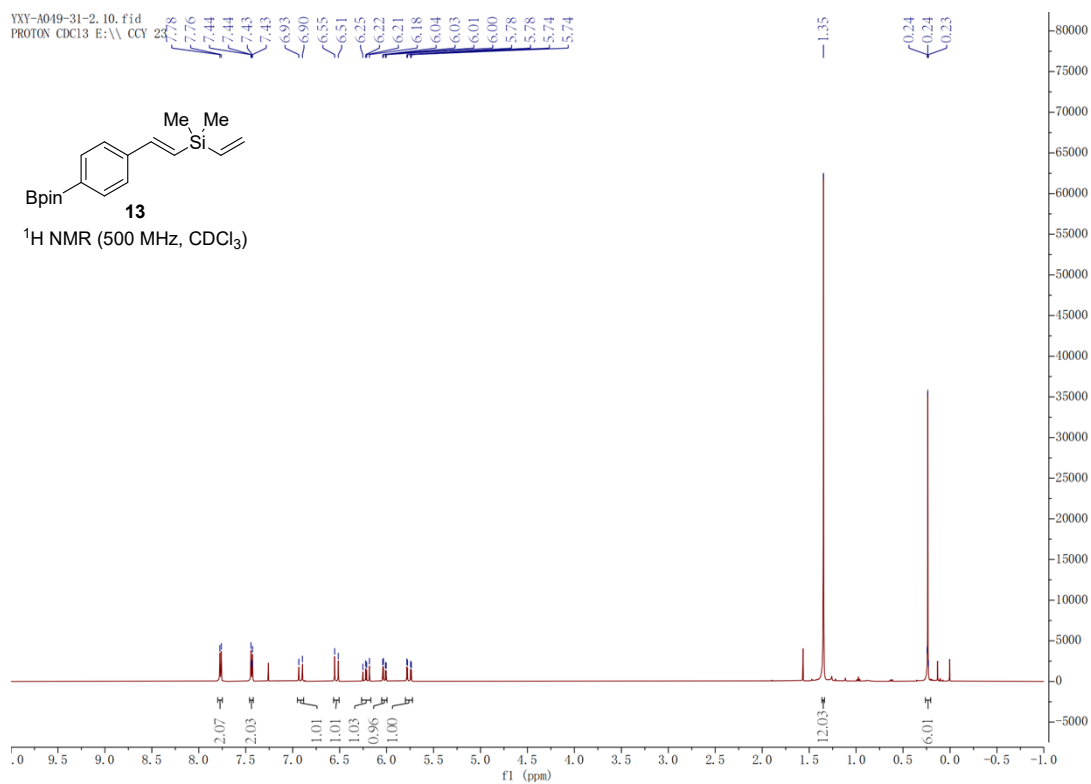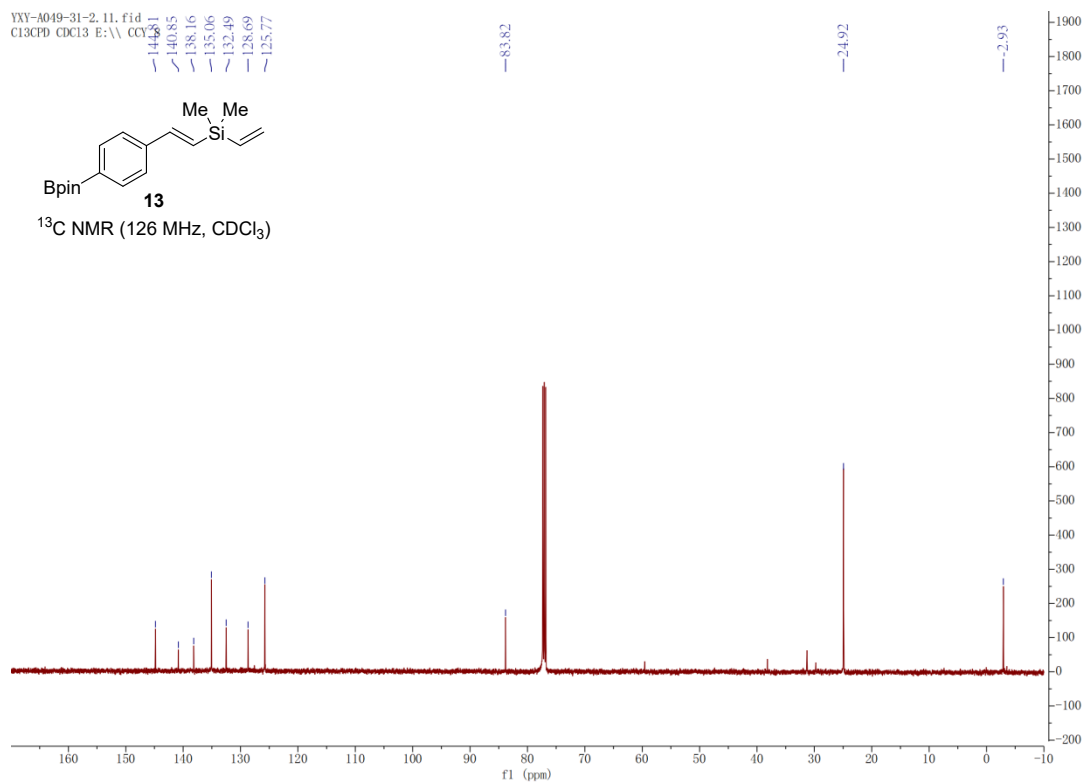

tjd-0308-yy-1

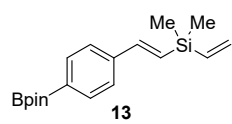

$^{11}\text{B}$  NMR (161 MHz,  $\text{CDCl}_3$ )

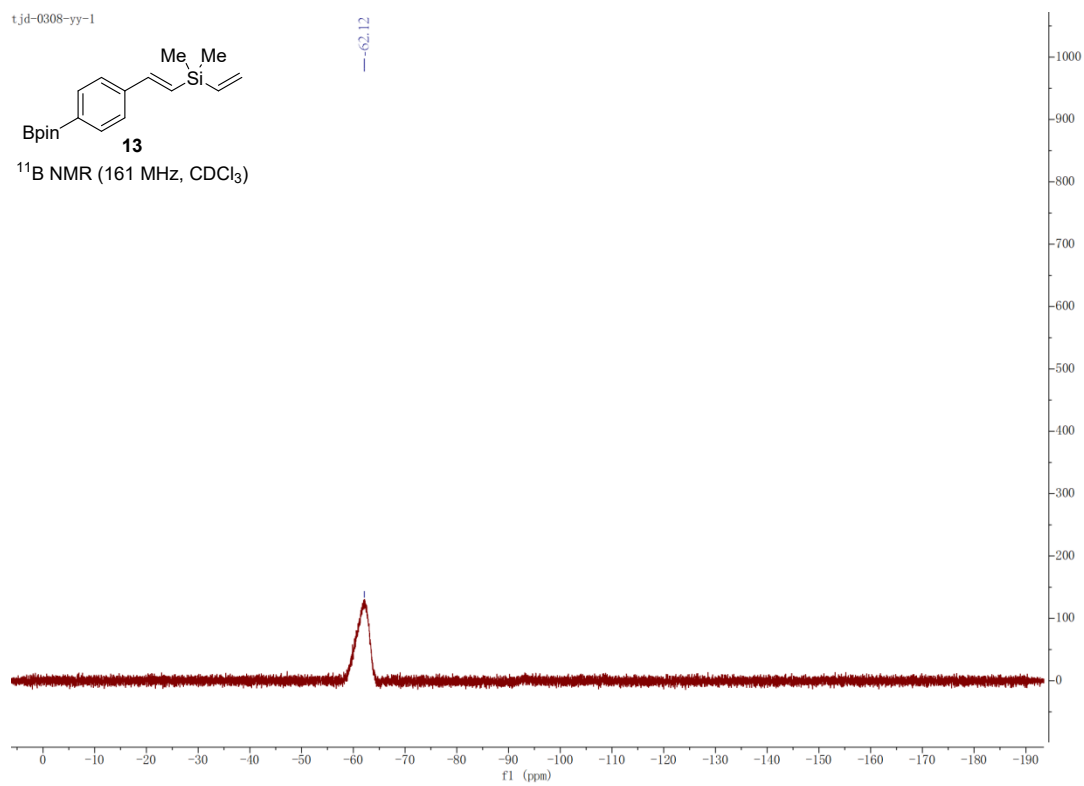

YXY-A049-50-2.10.fid  
 PROTON CDCl3 E:\ \ CCY 5

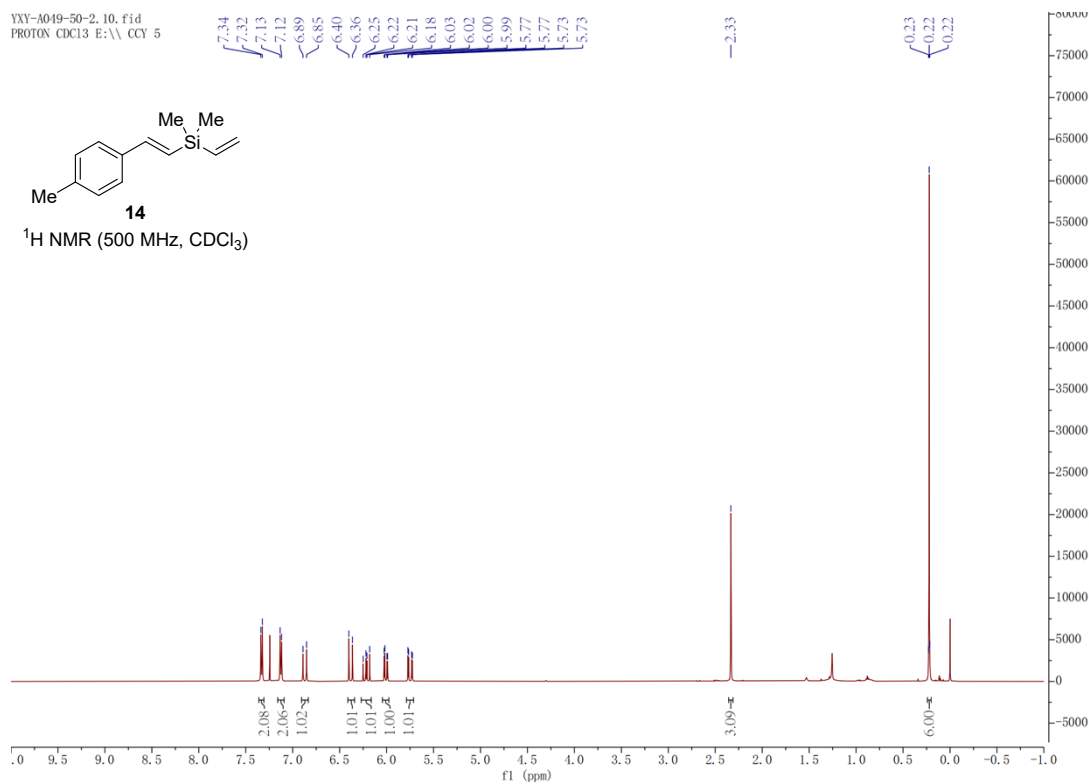

YXY-A049-50-2.11.fid  
 C13CPD CDCl3 E:\ \ CCY 5

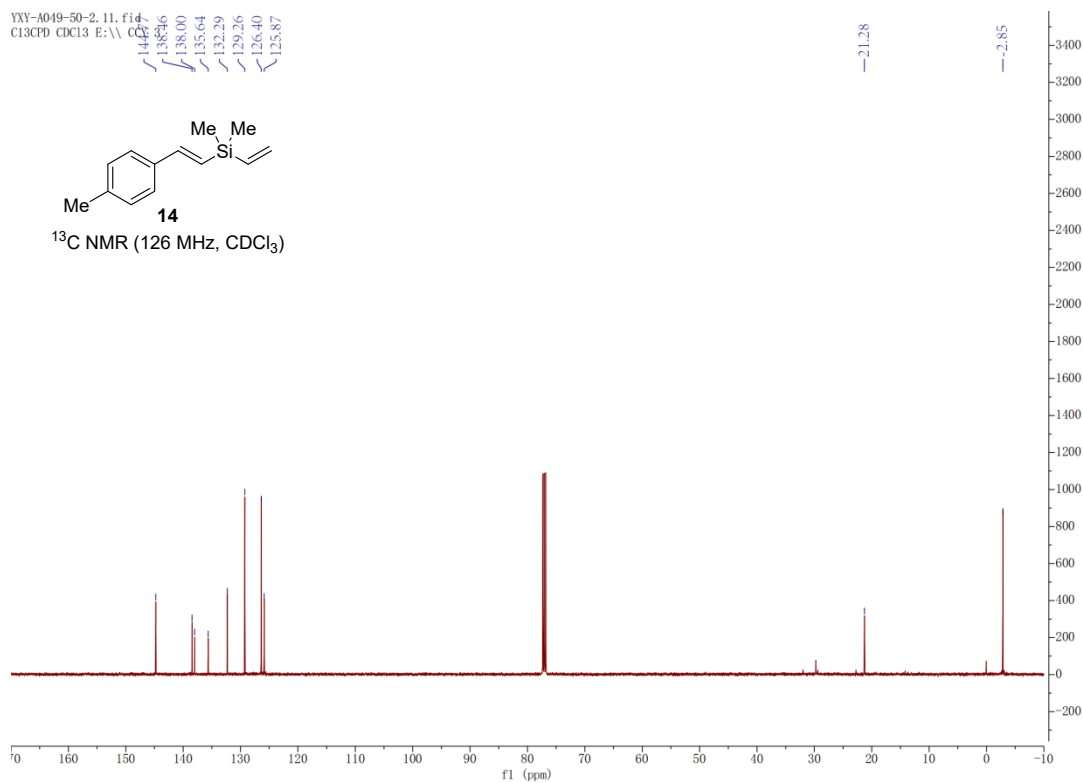

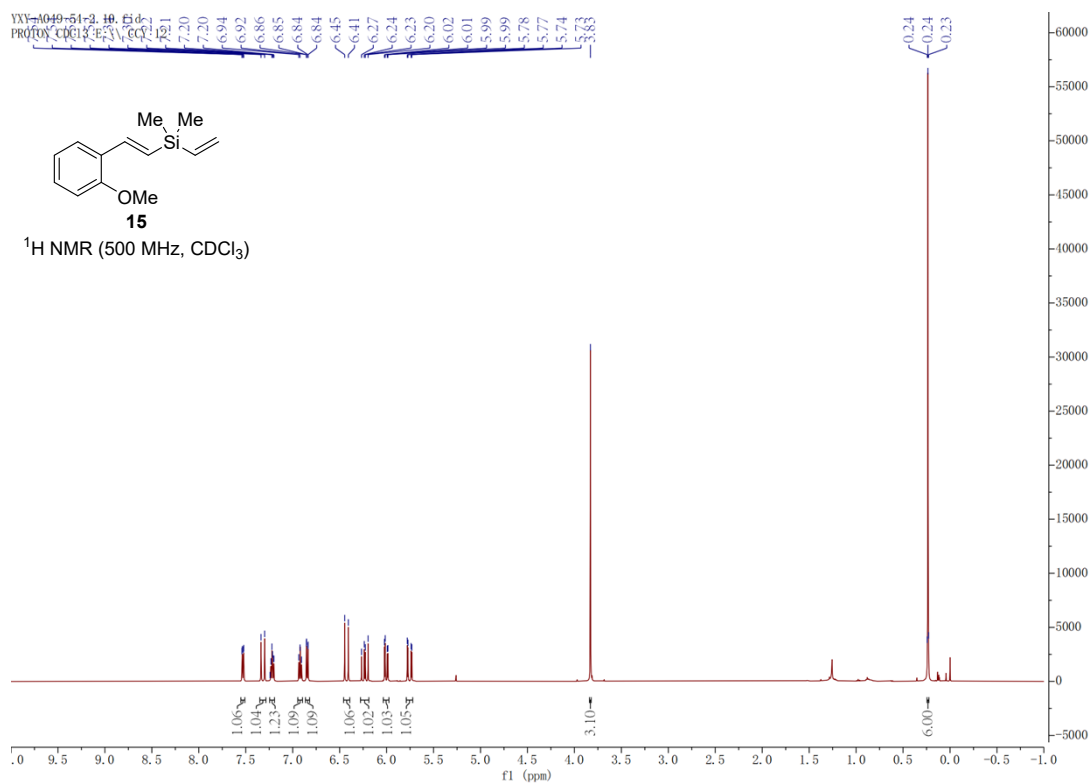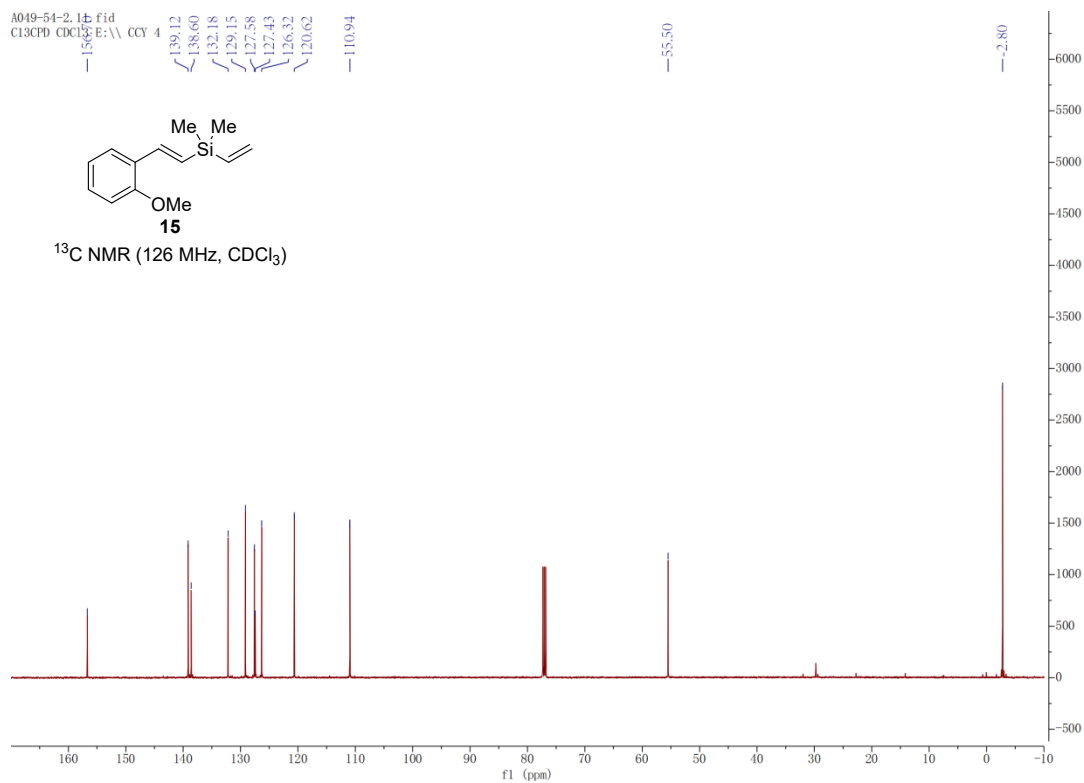



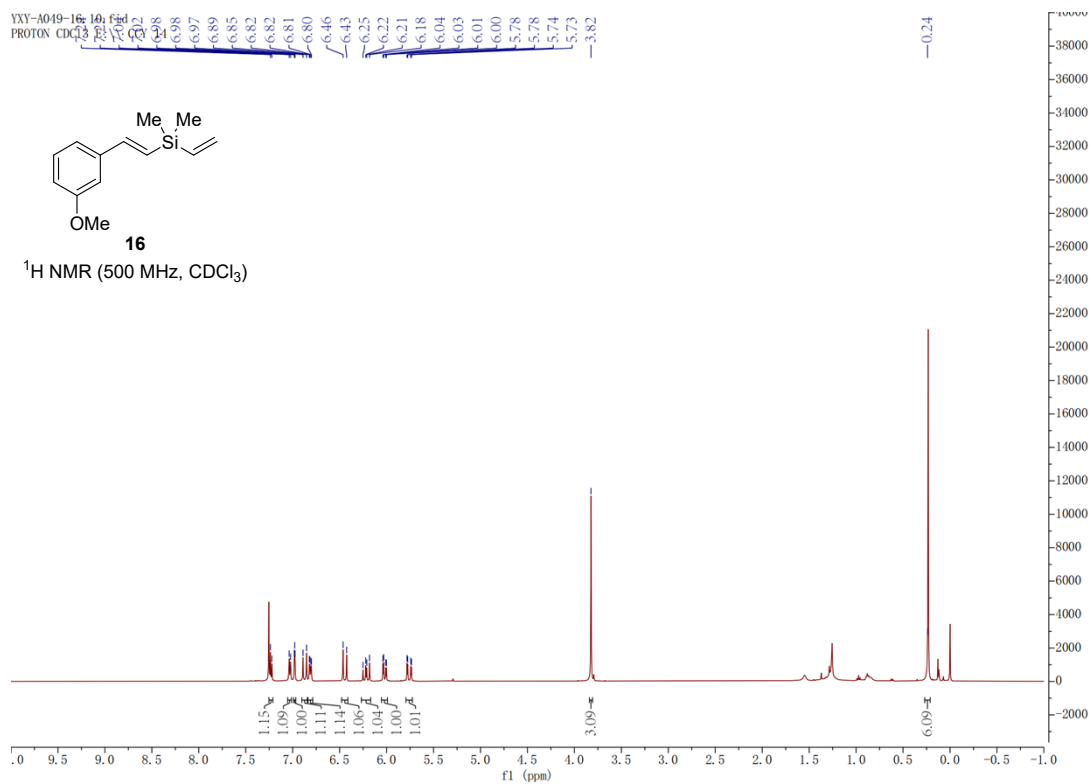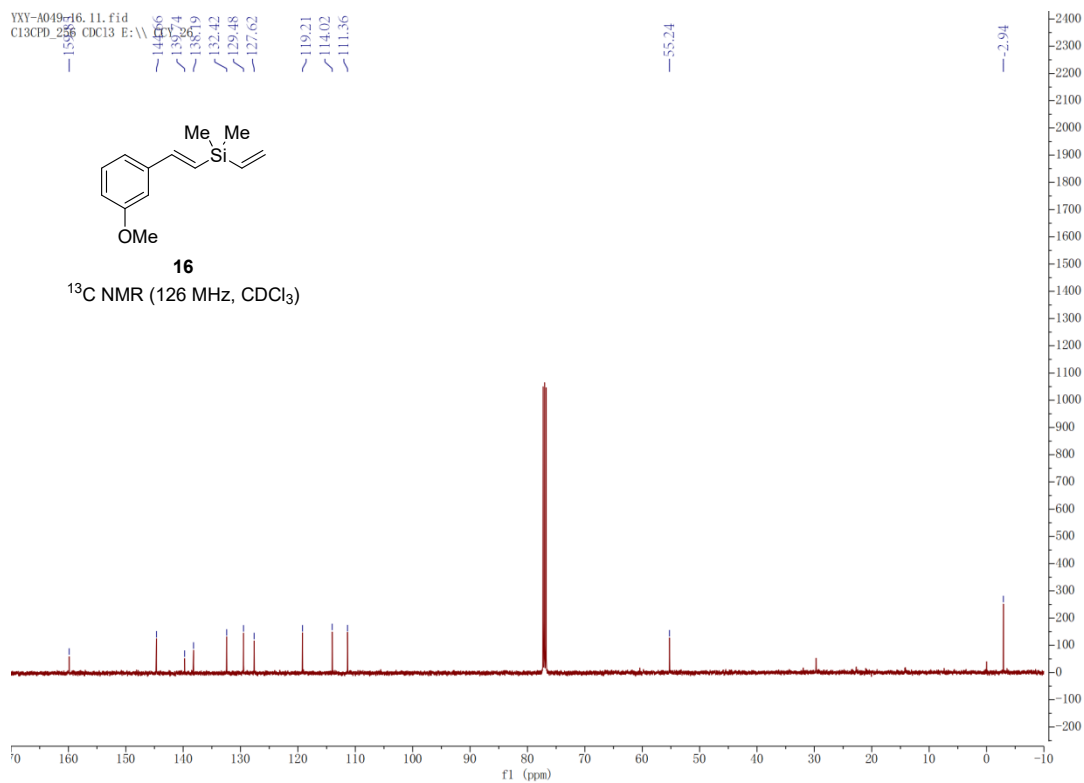

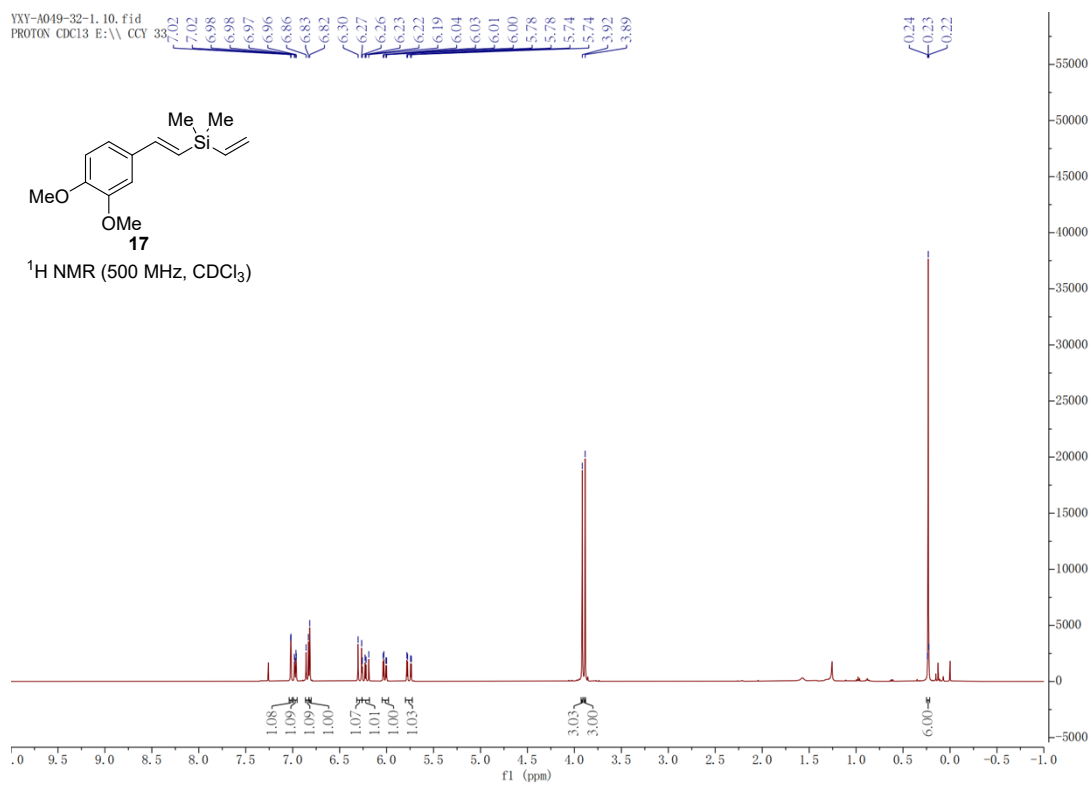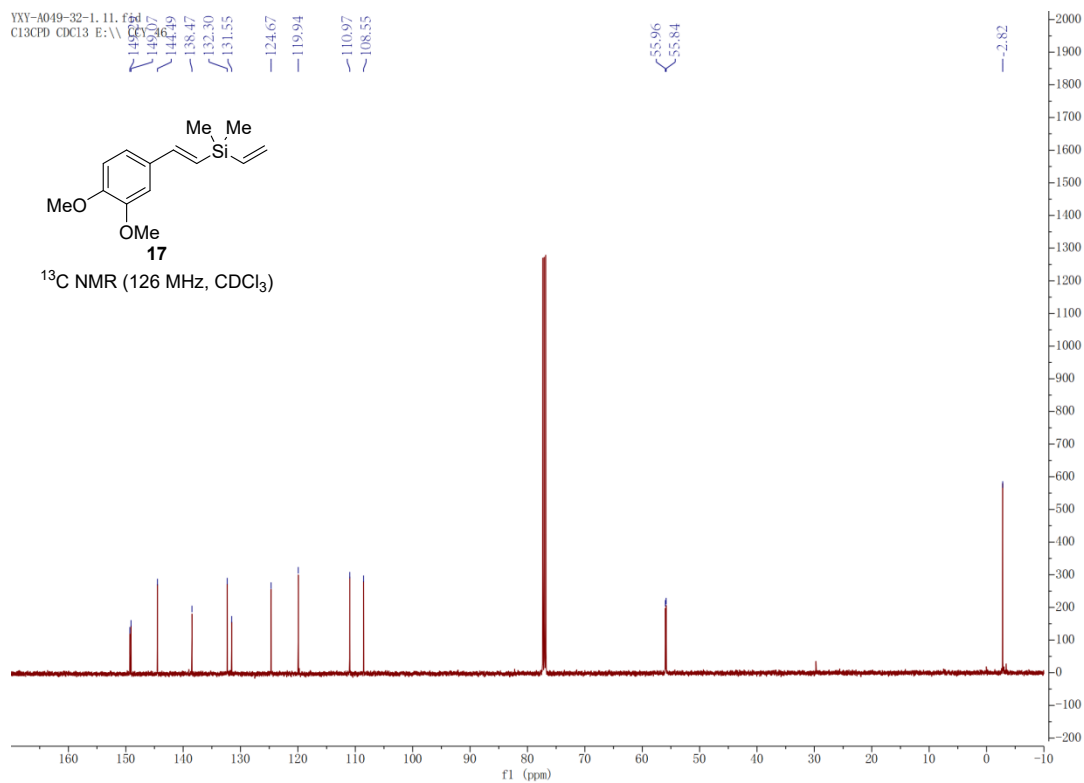

YXY-A049-51-2.10.fid  
 PROTON CDCl3 E:\ CCY 40

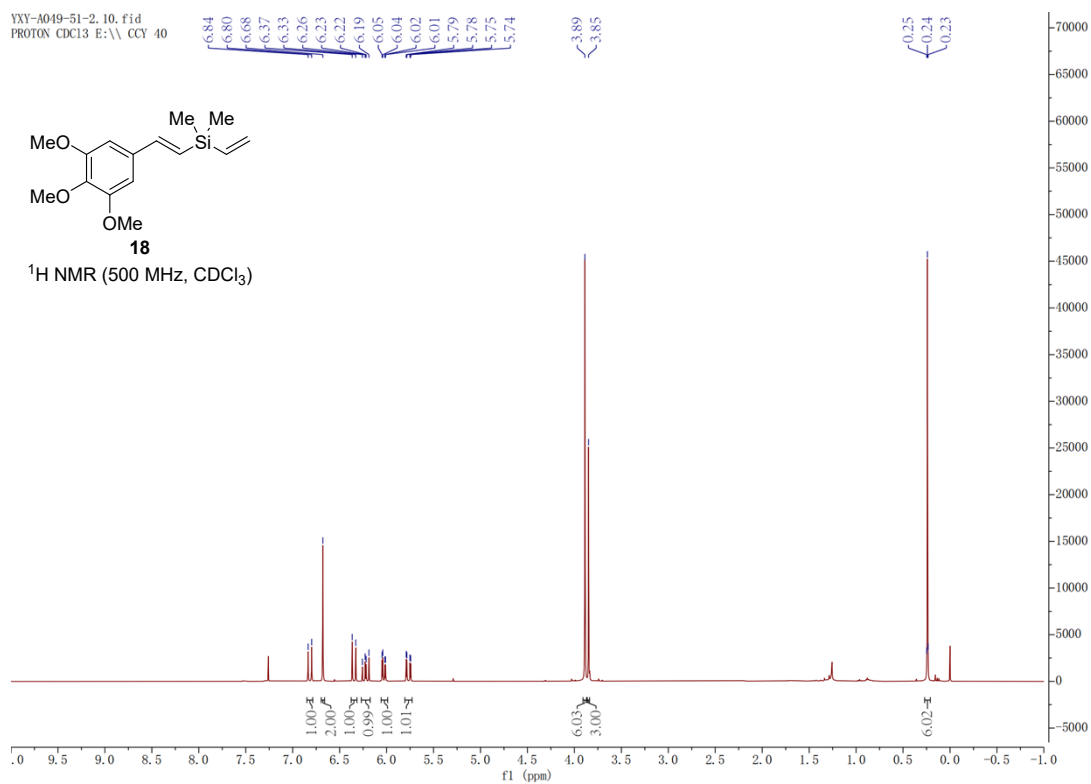

YXY-A049-51-2.11.fid  
 C13CPD CDCl3 E:\ CCY

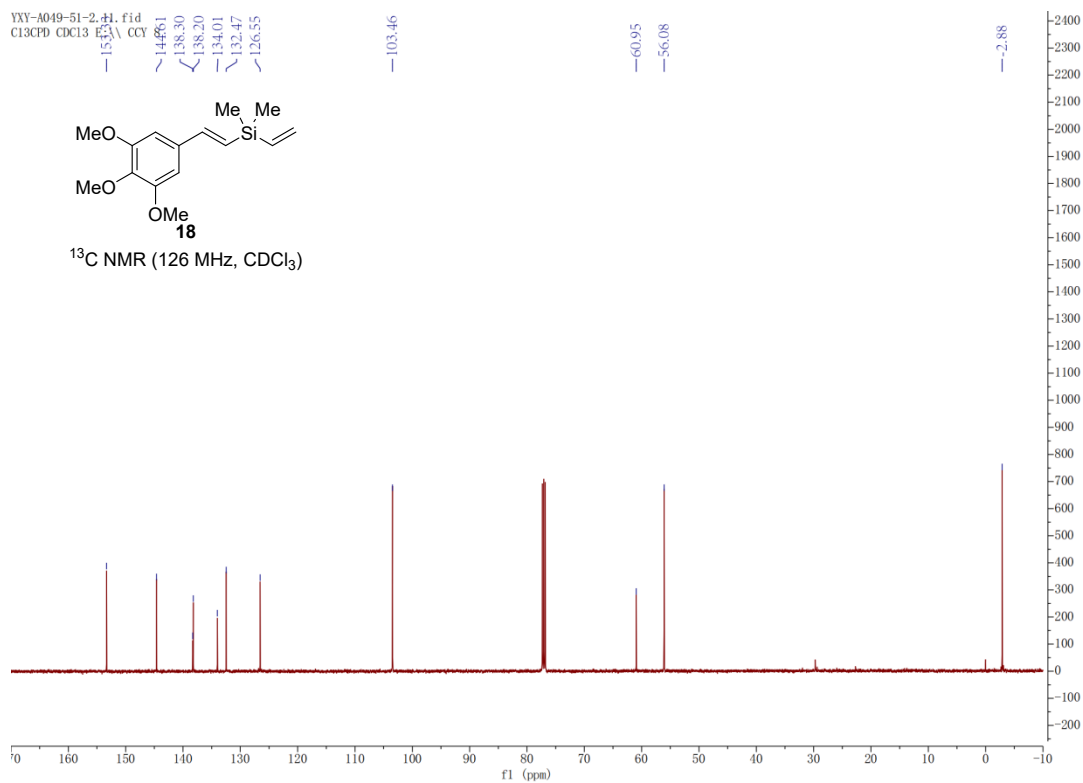

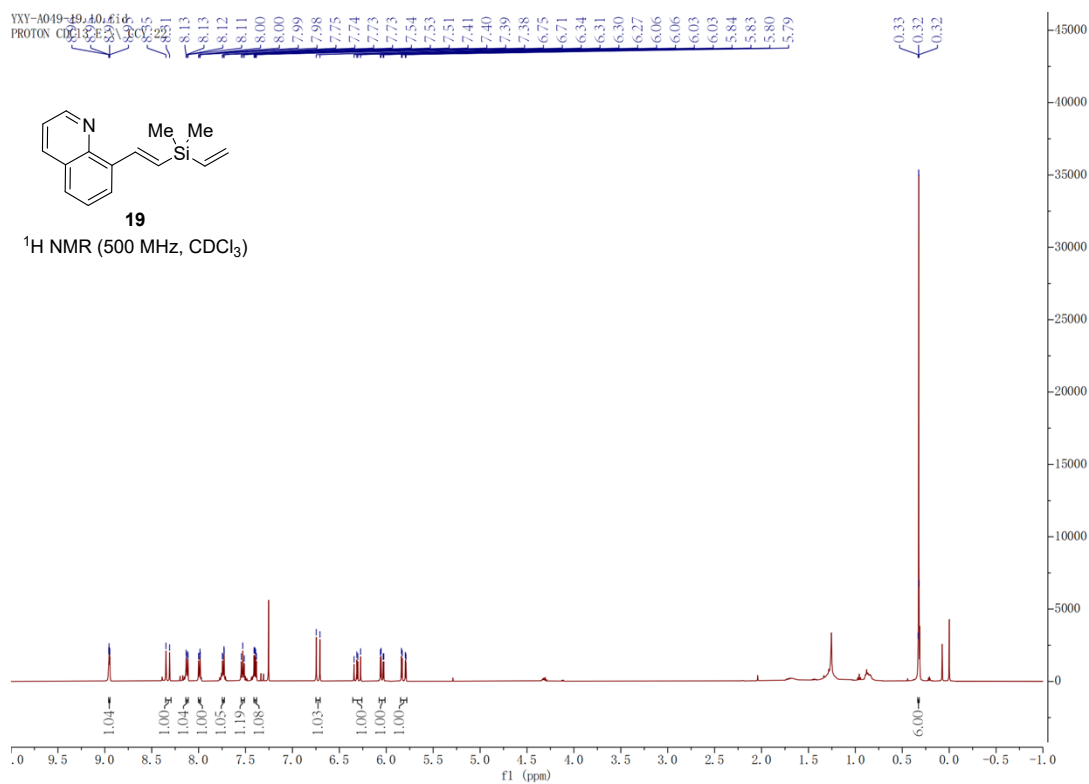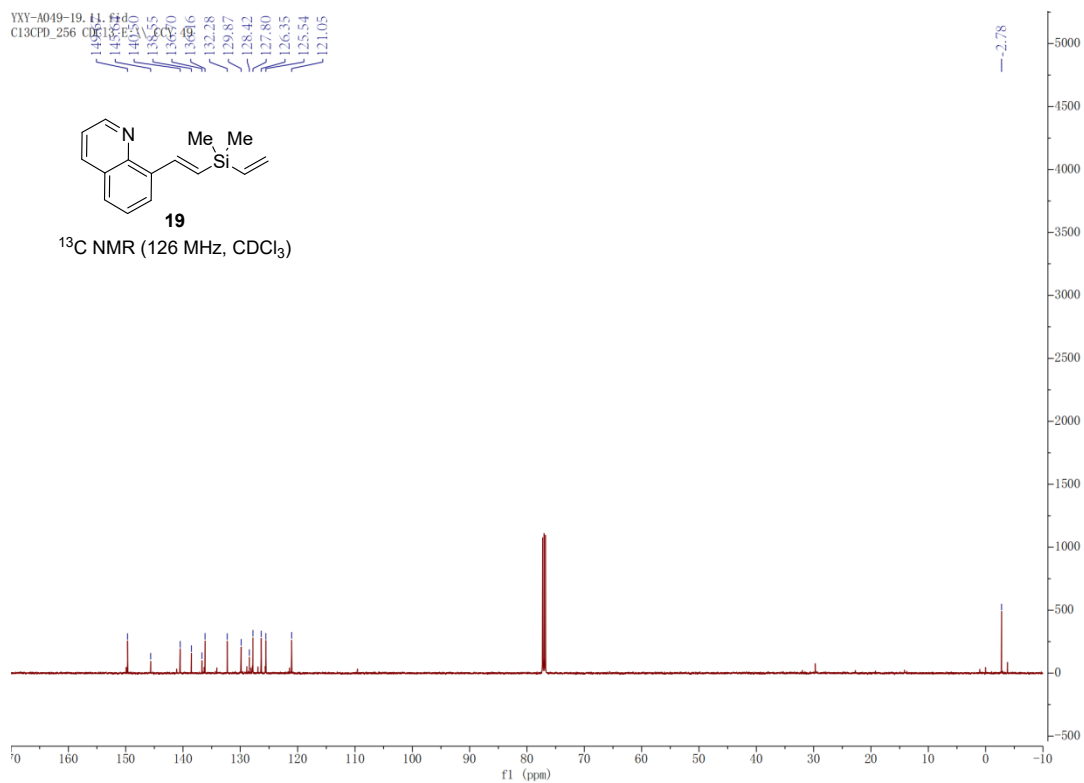

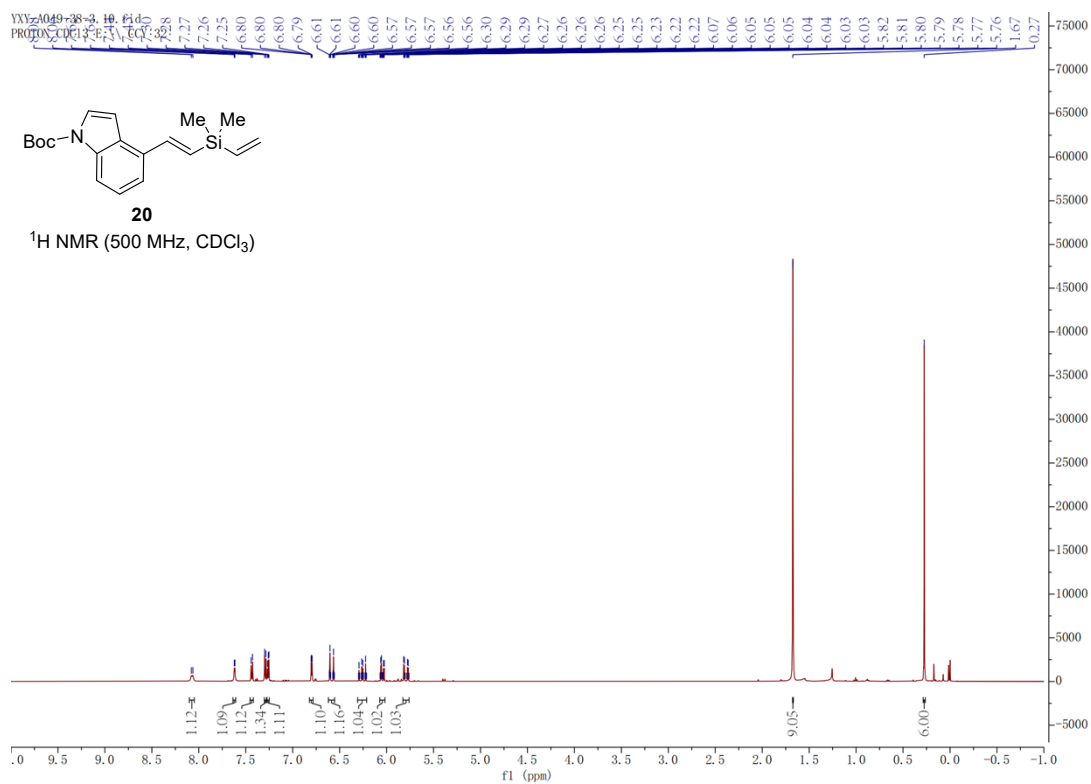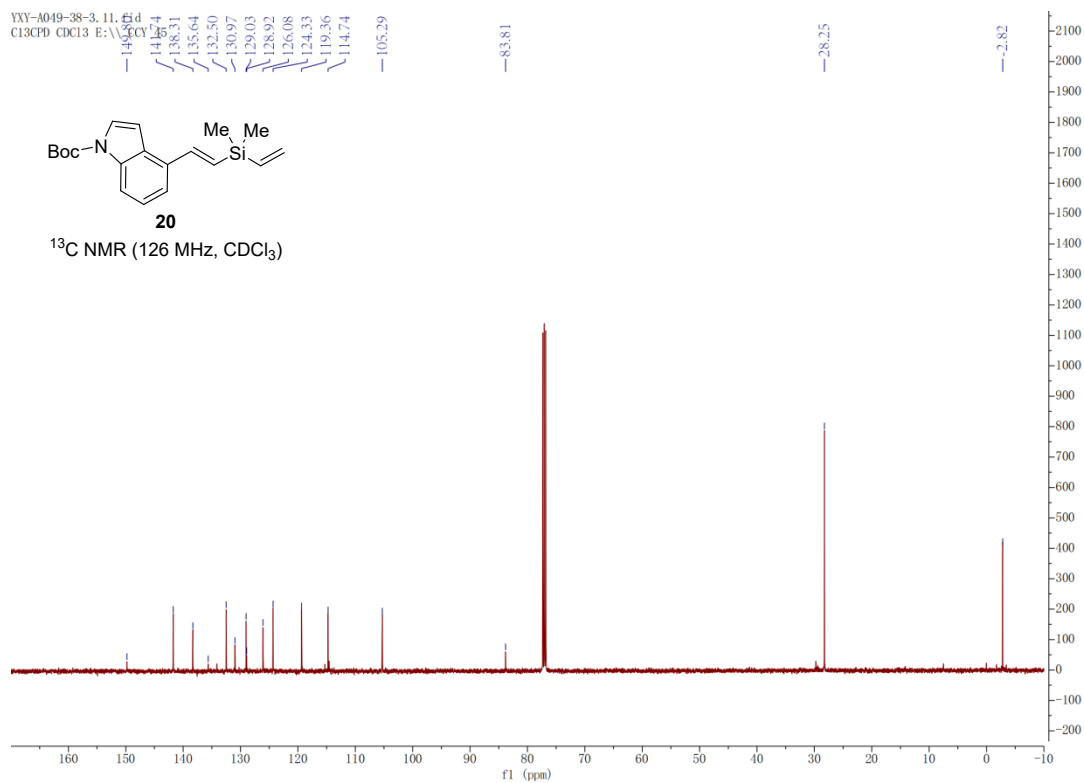

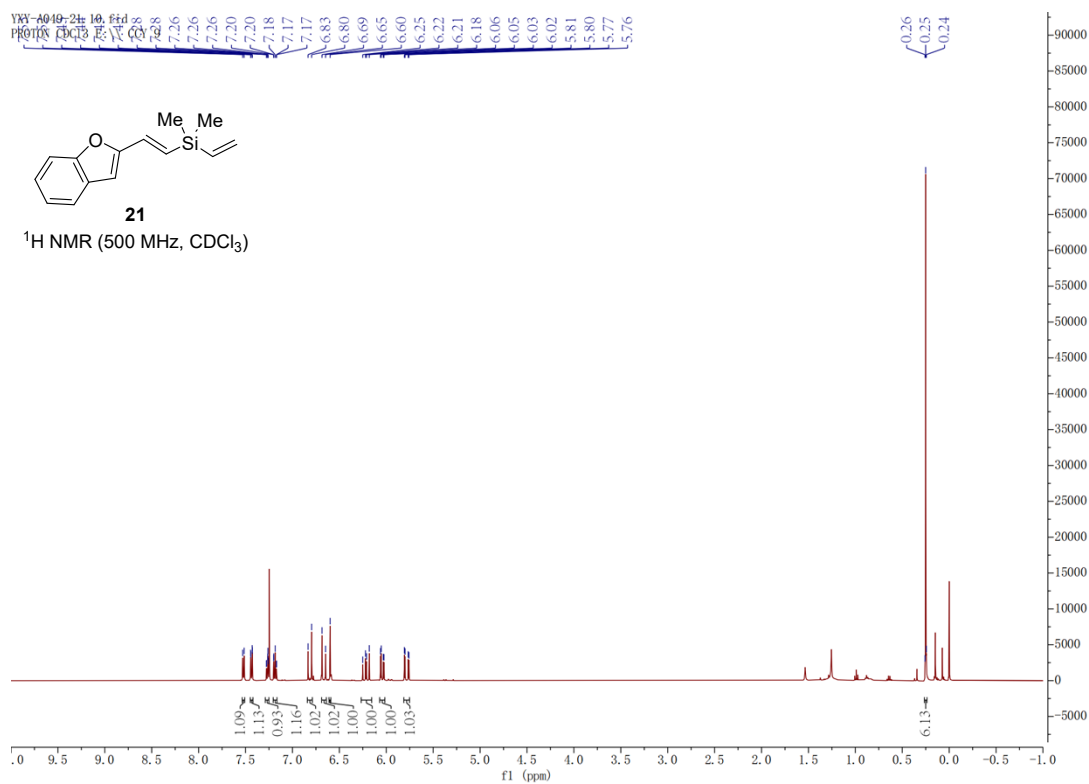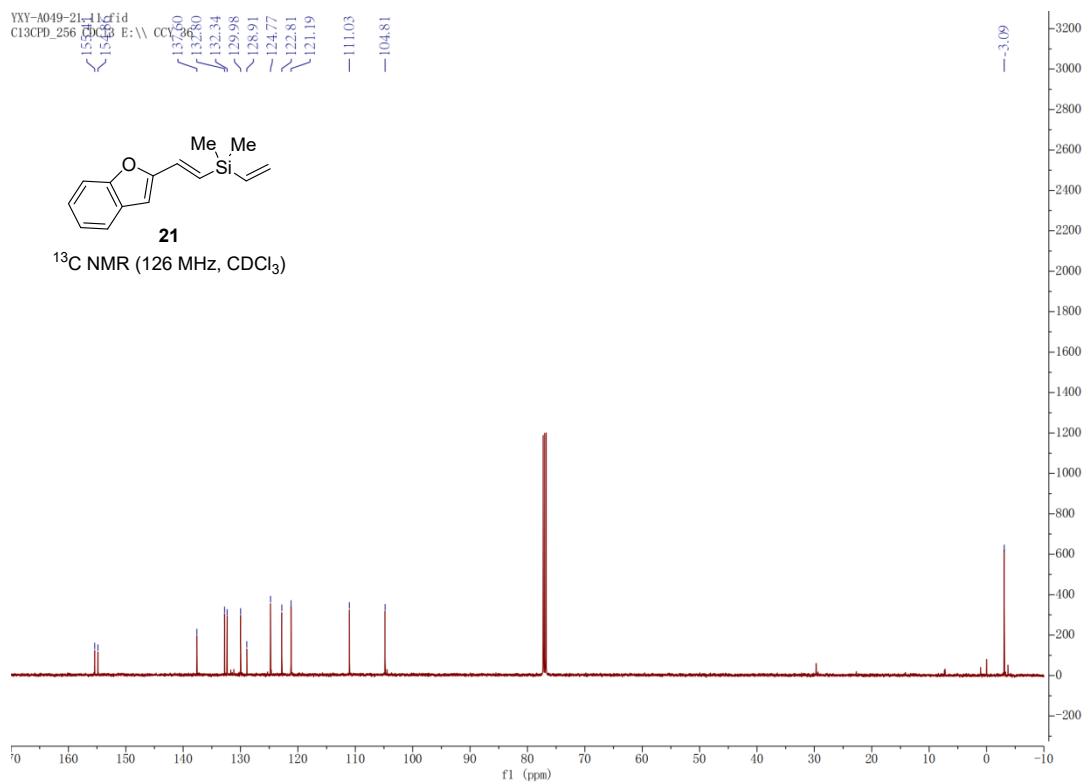

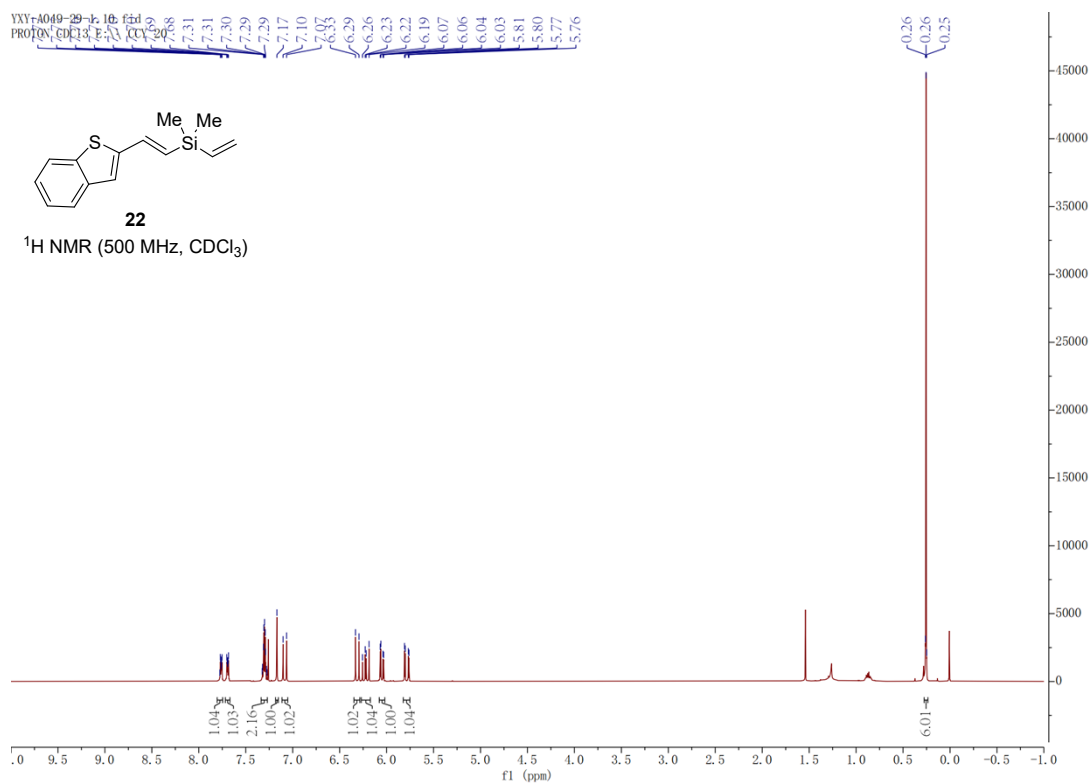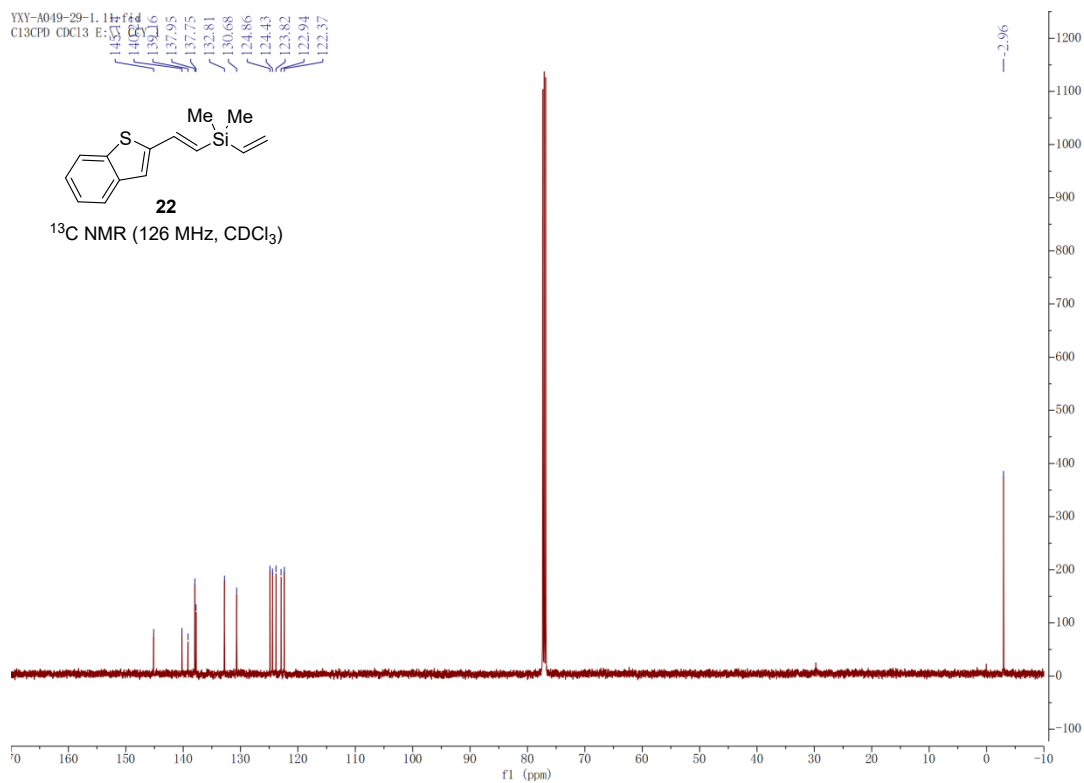





YXY-A049-41-2.10.fid  
 PROTON CDCl3 E:\ CCY 35

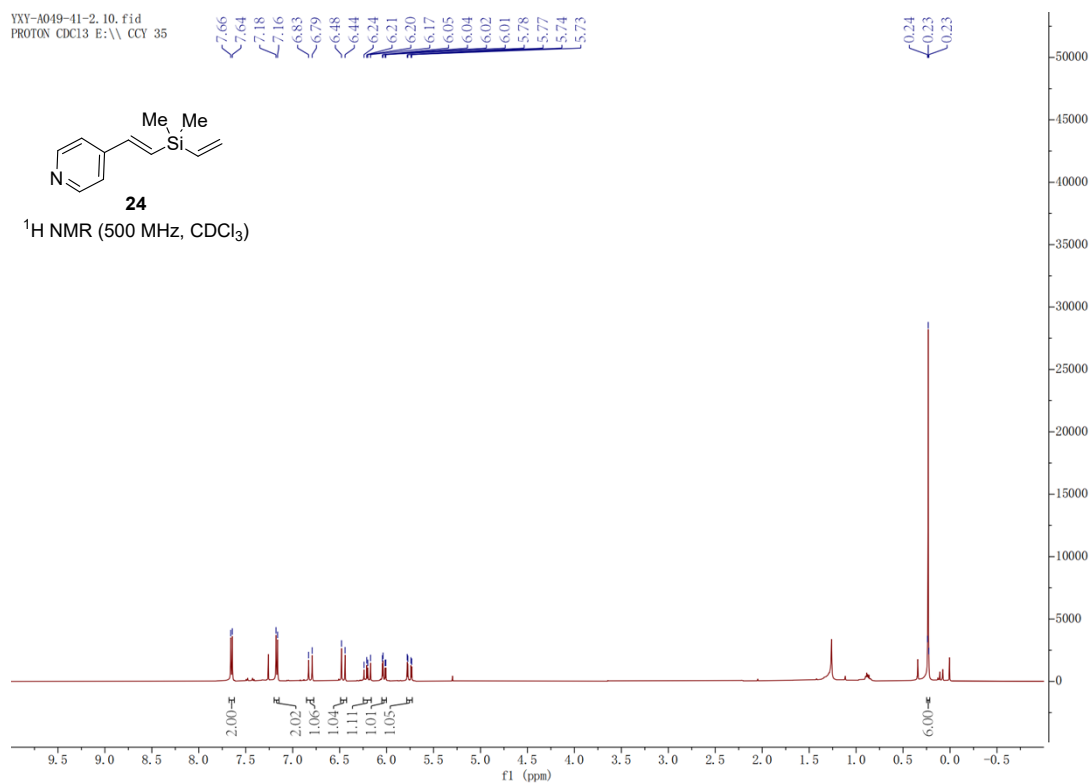

YXY-A049-41-2.11.fid  
 C13CPD CDCl3 E:\ CCY 35

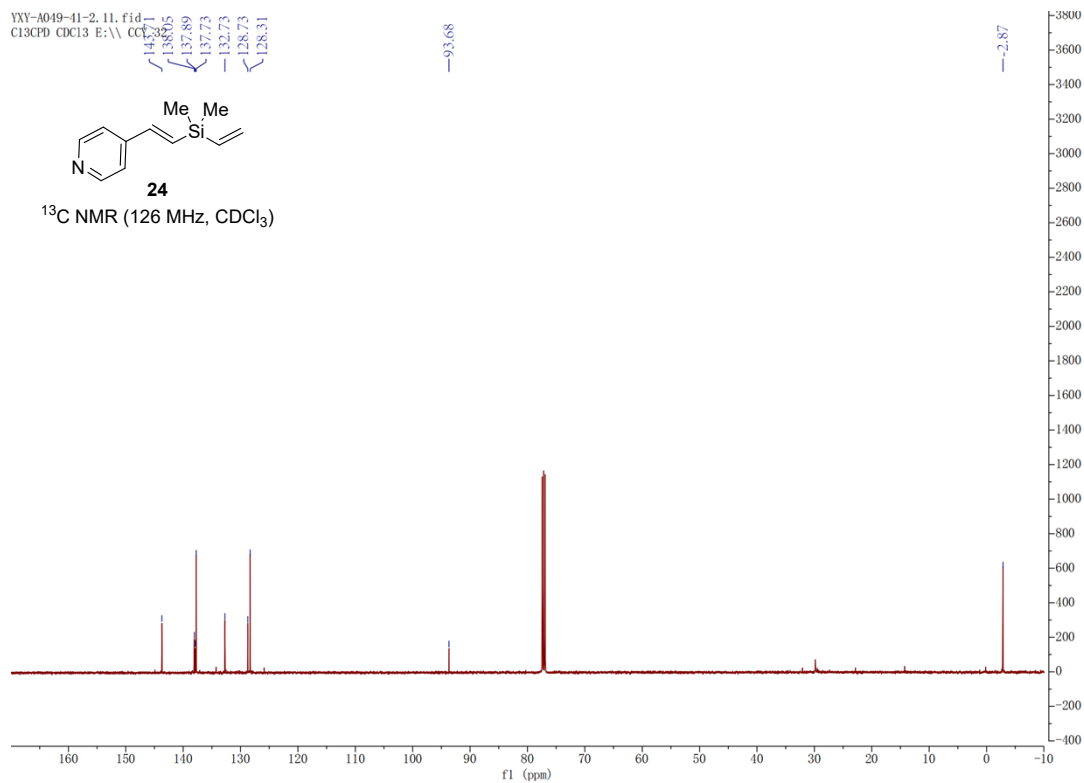

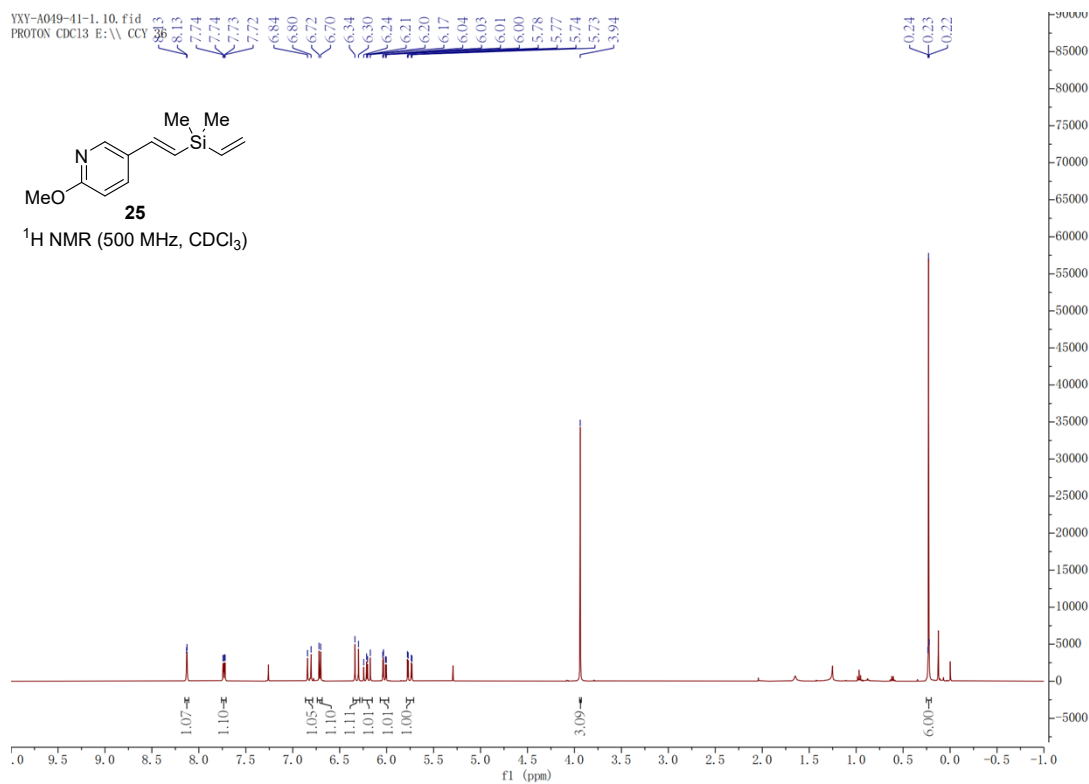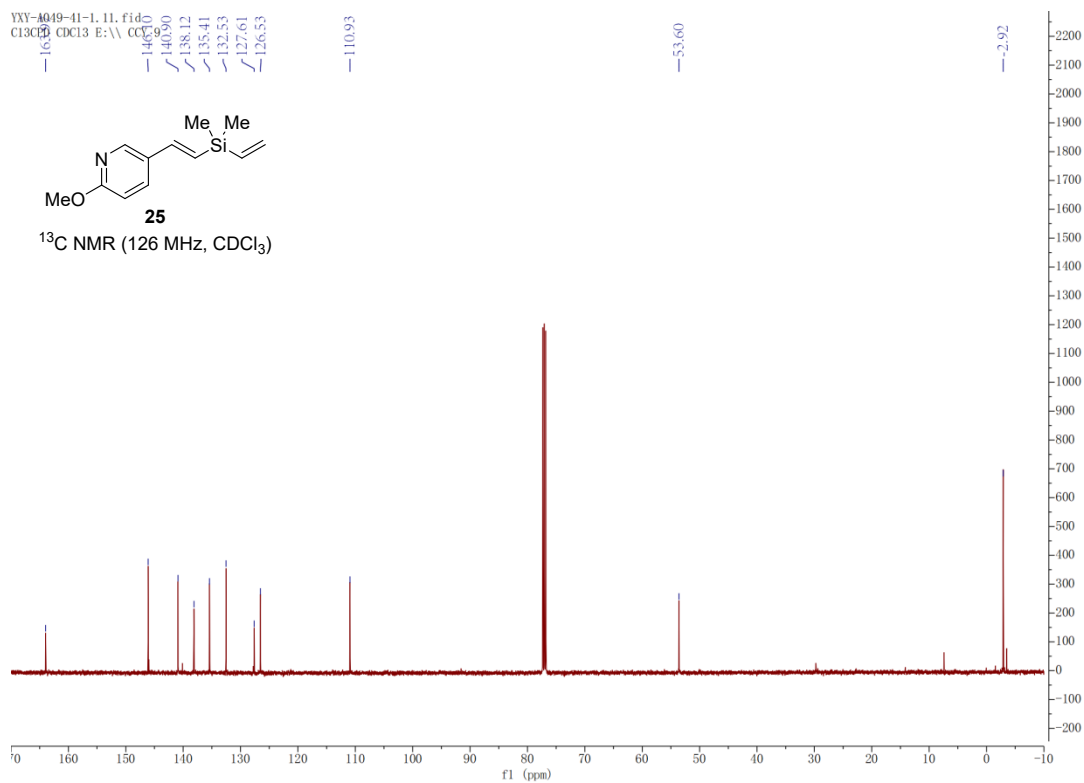





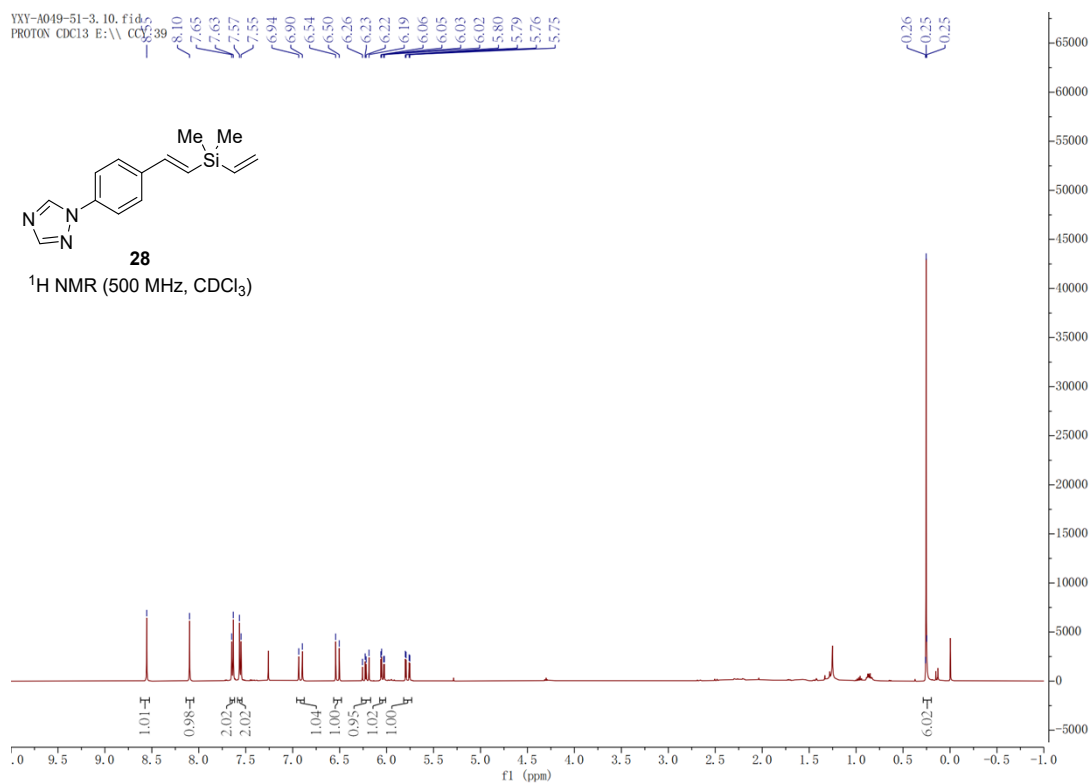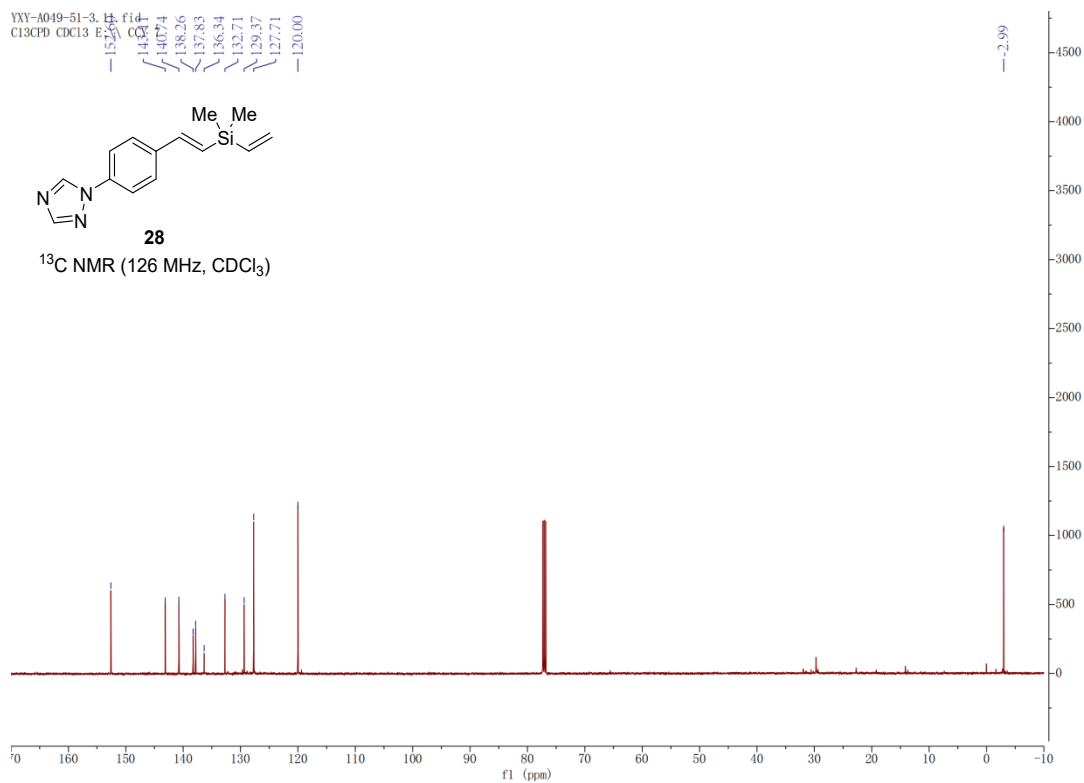

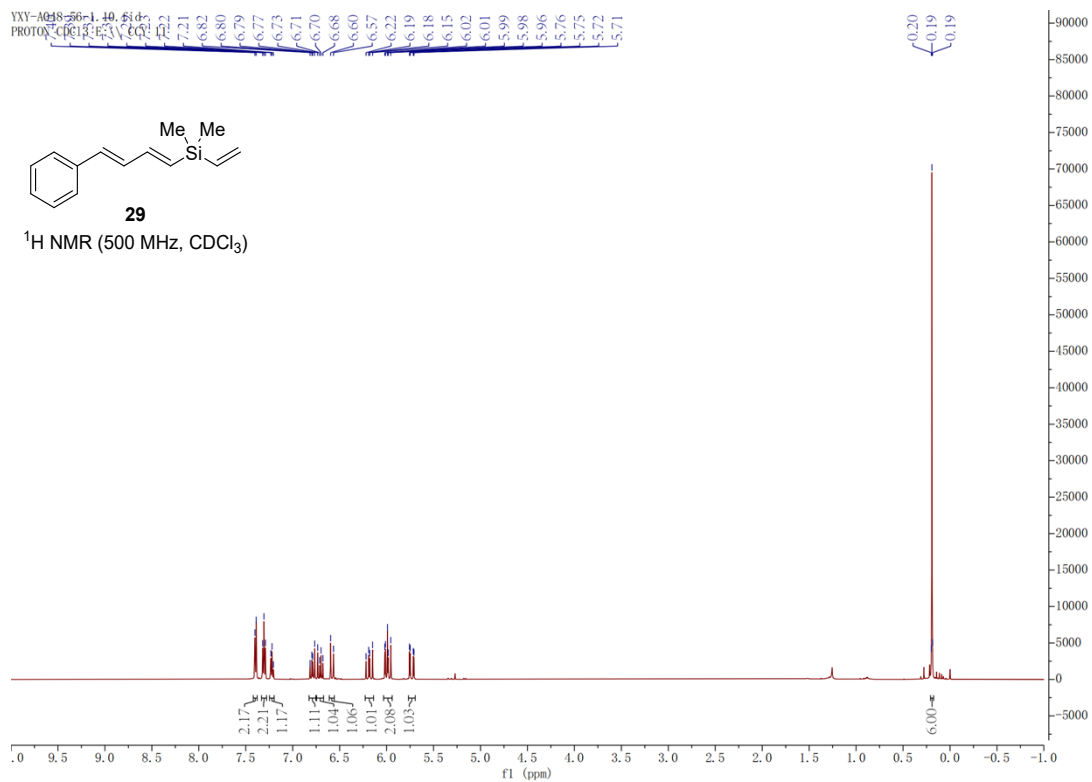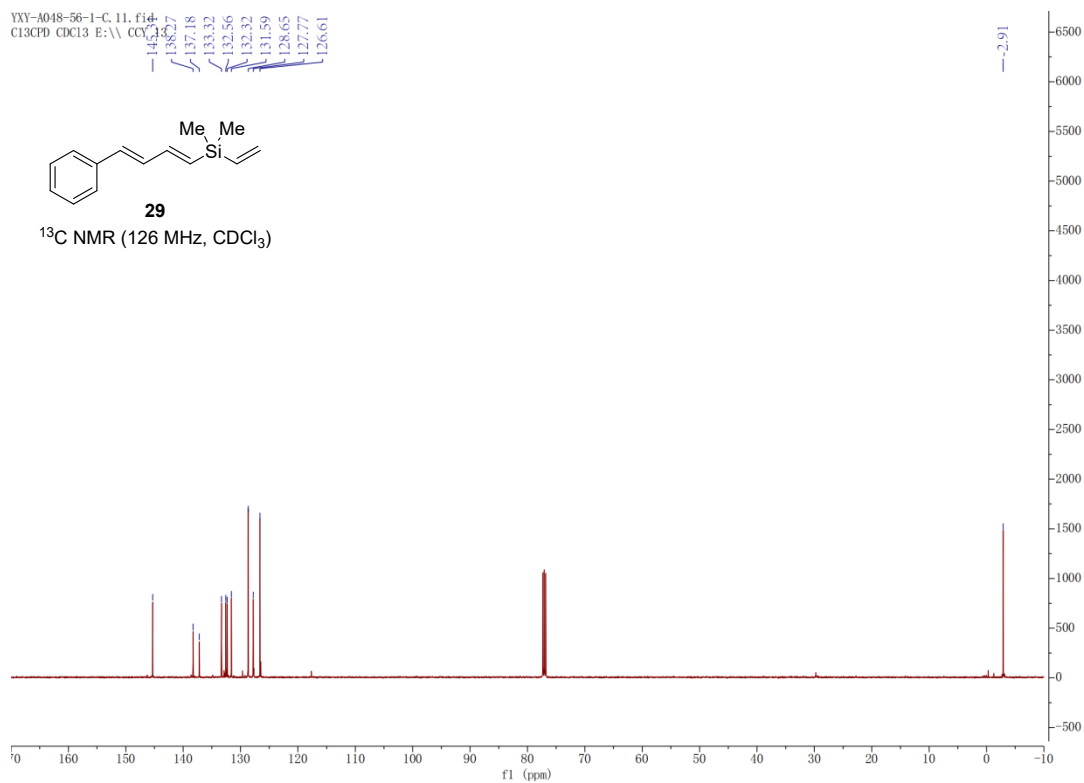

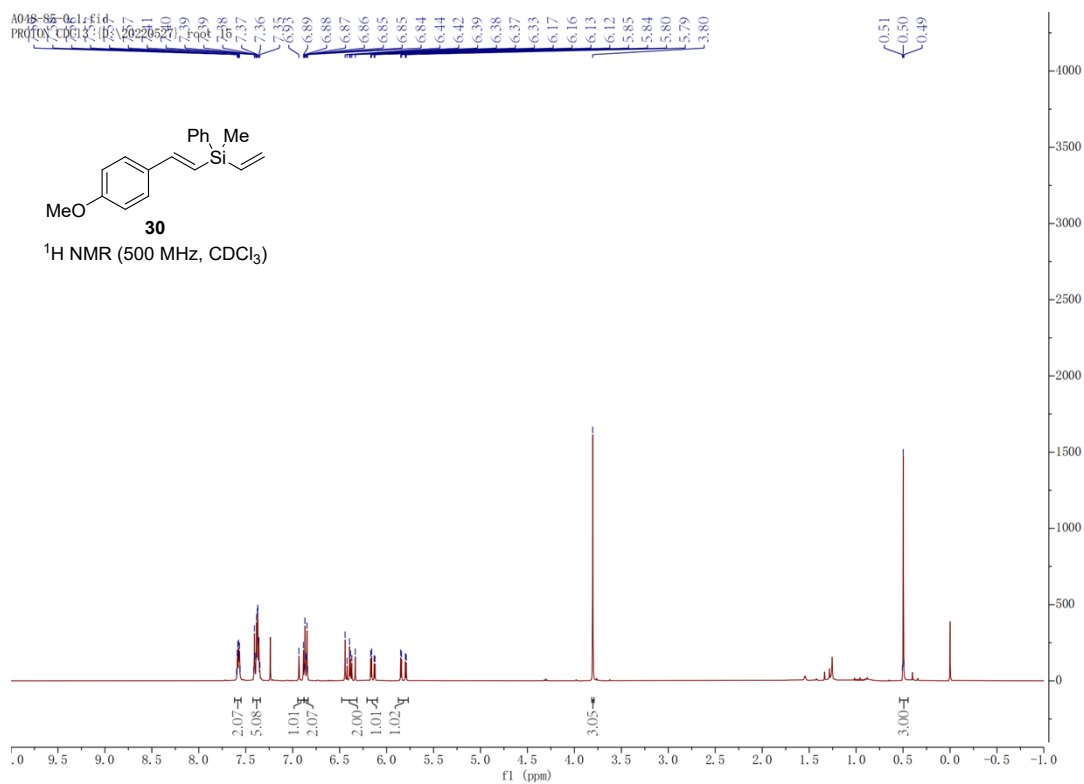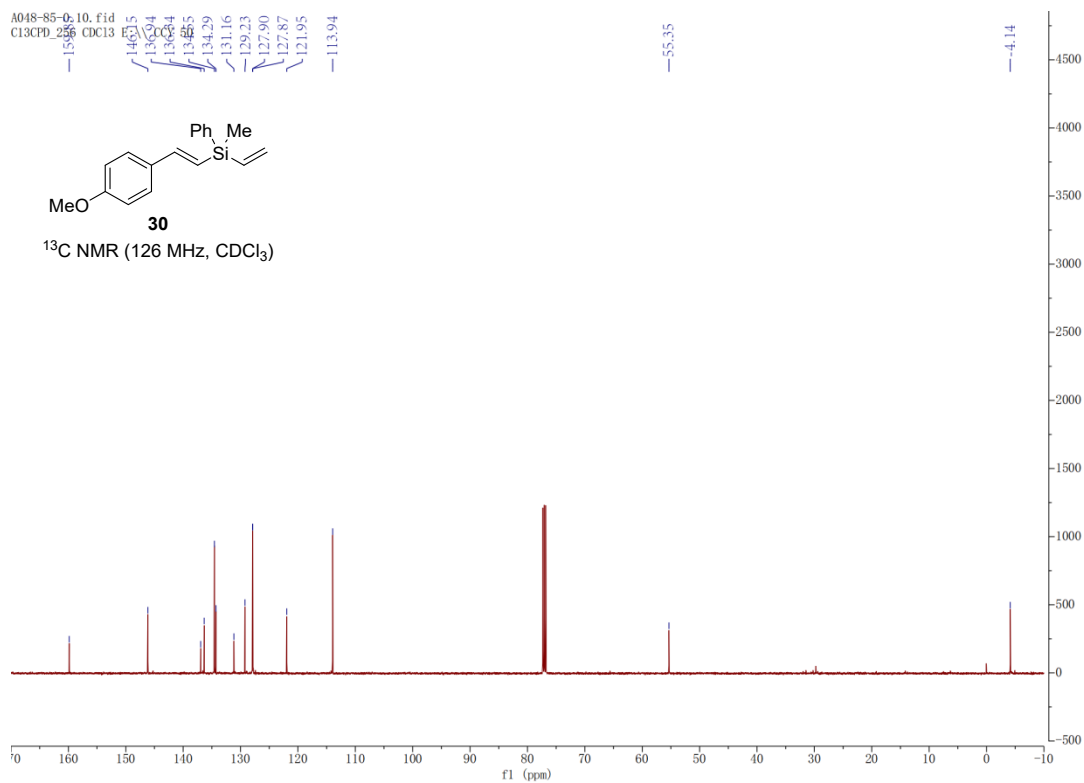

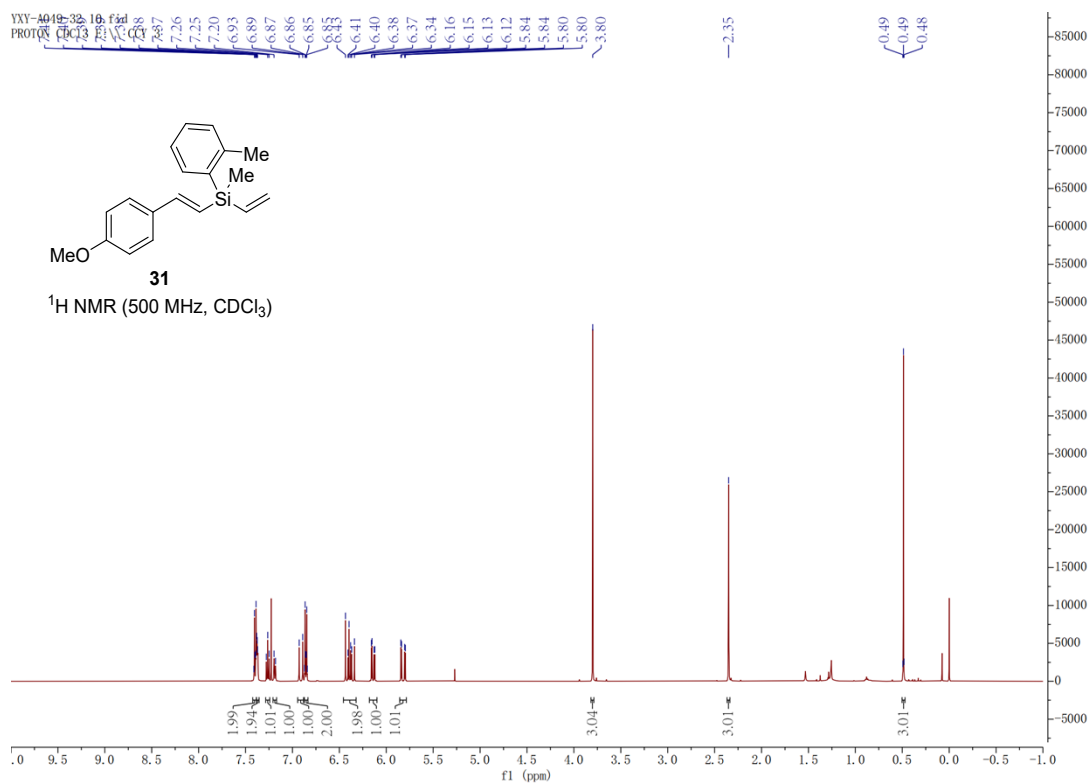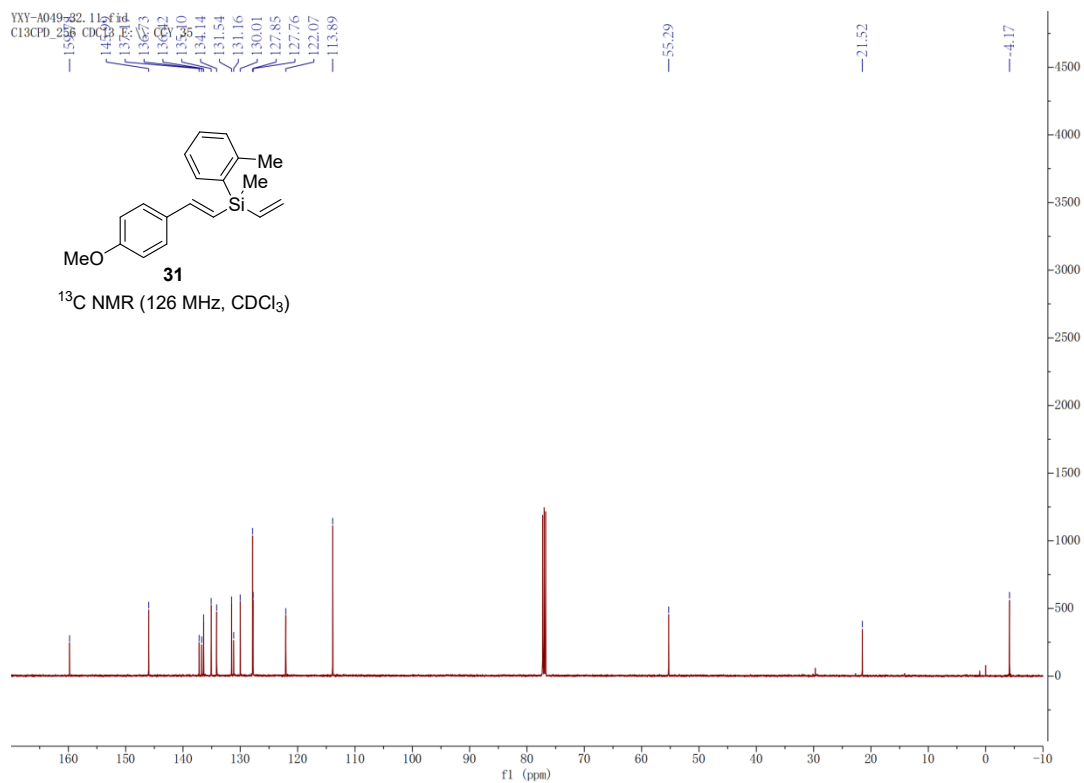



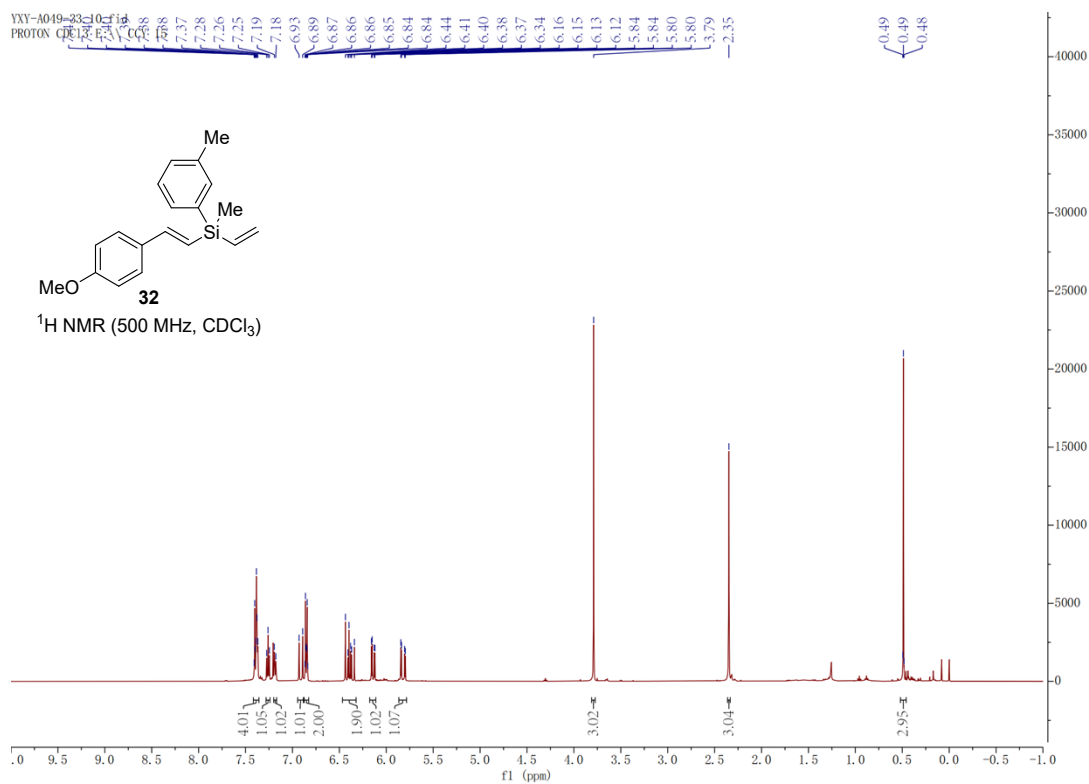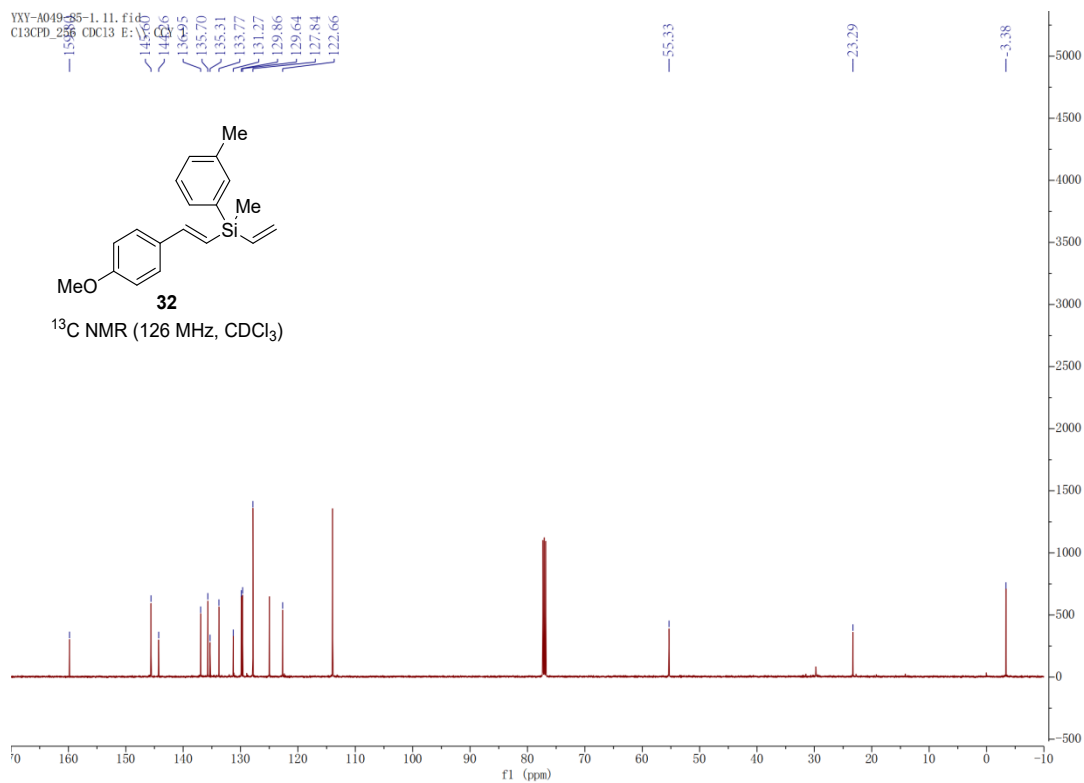

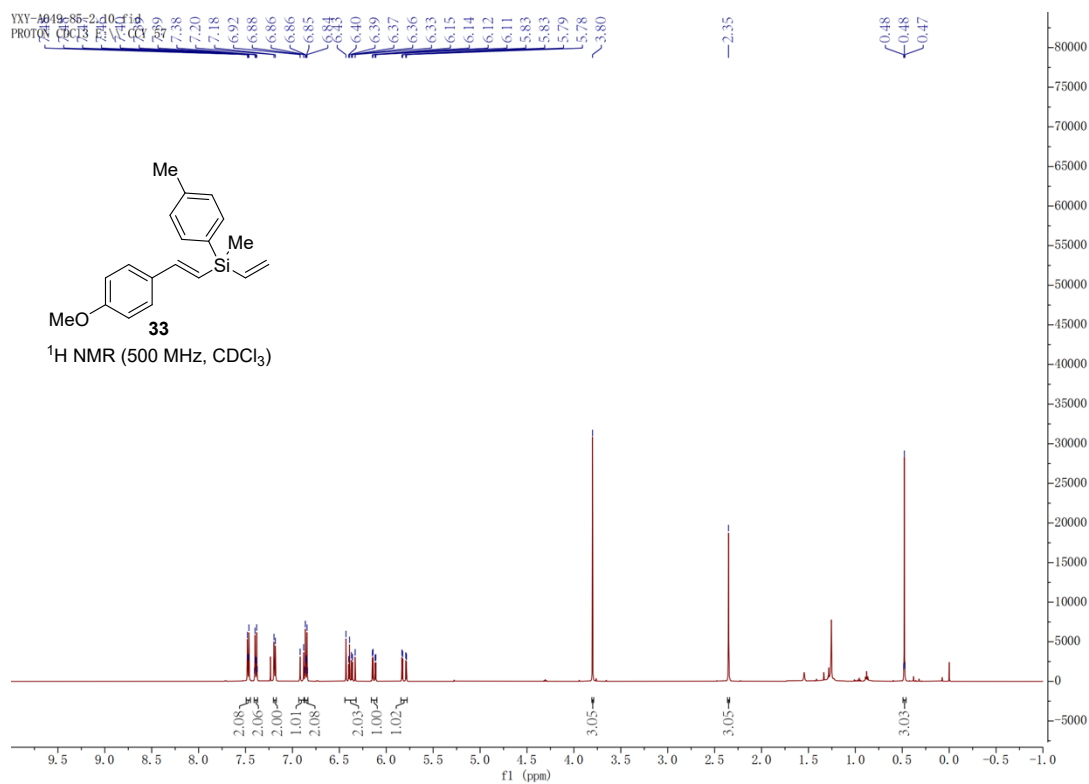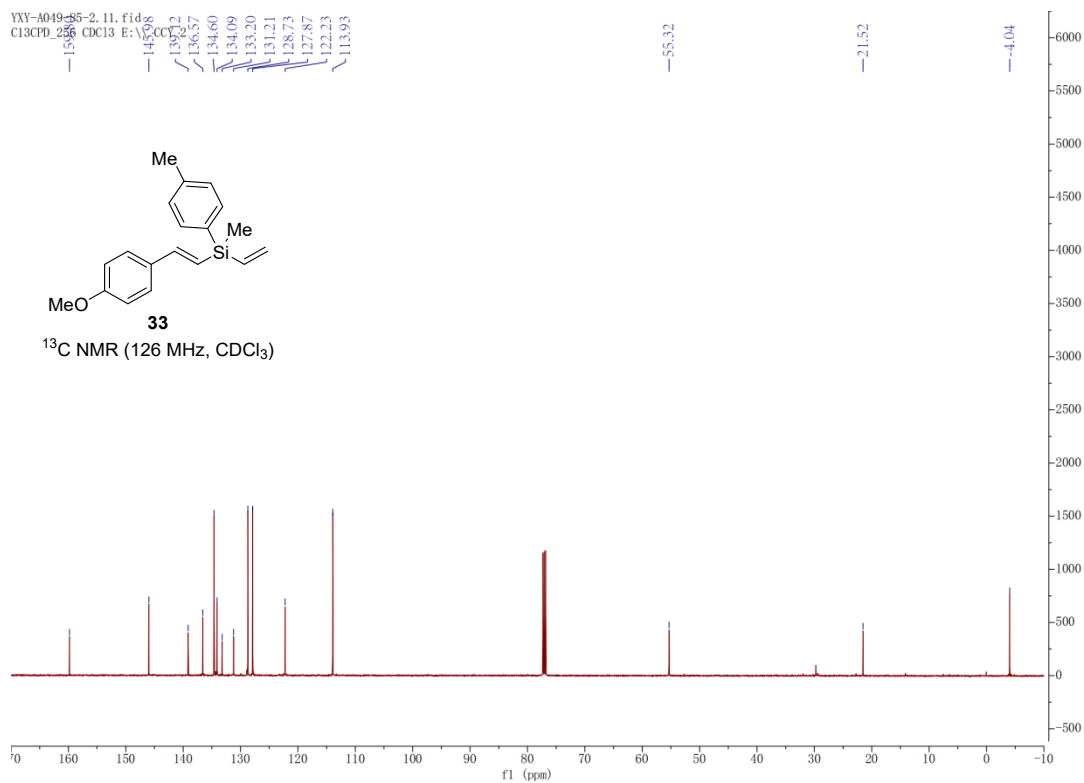

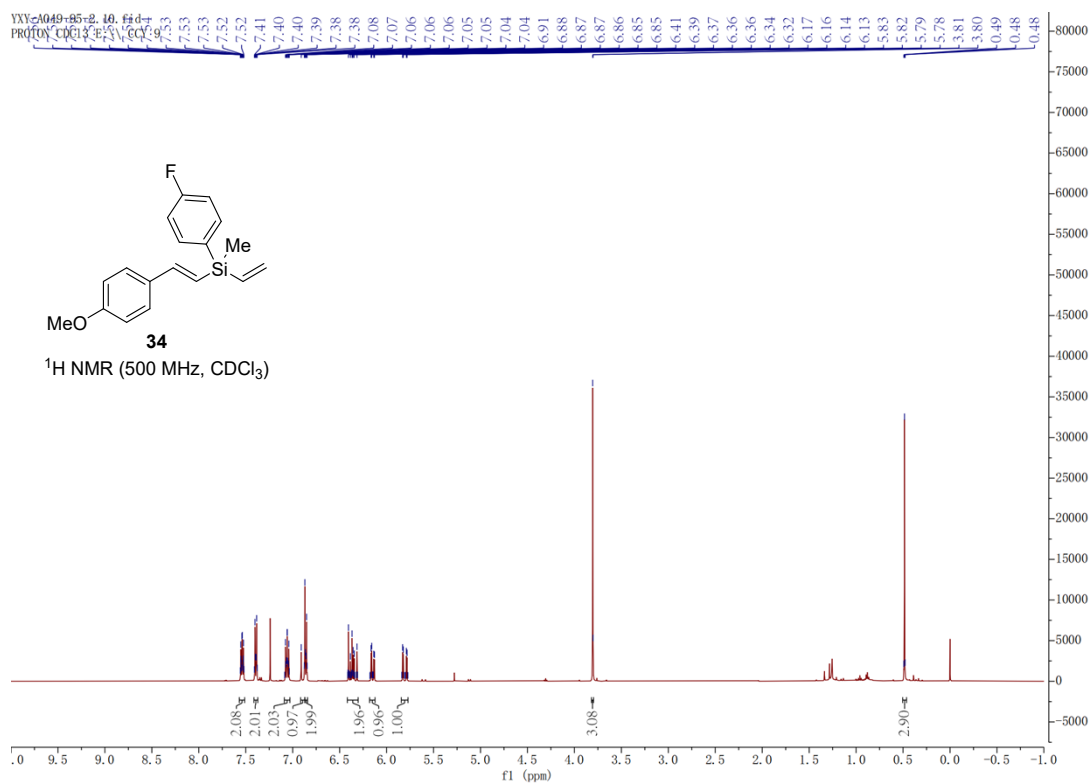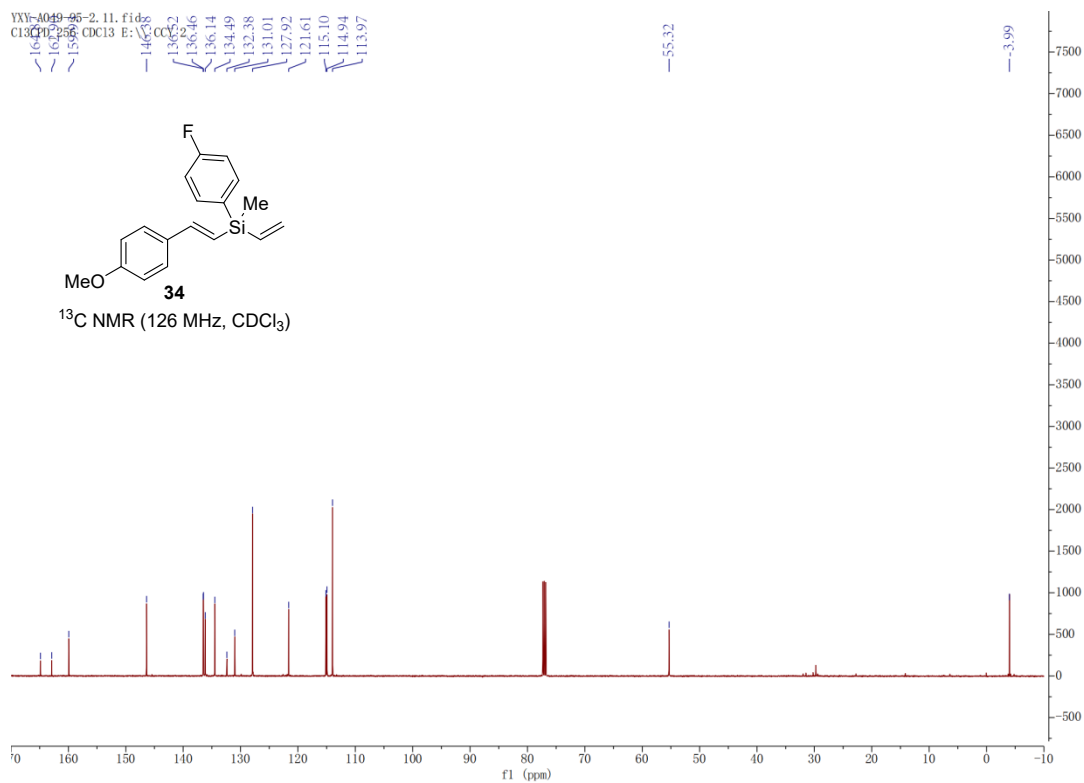

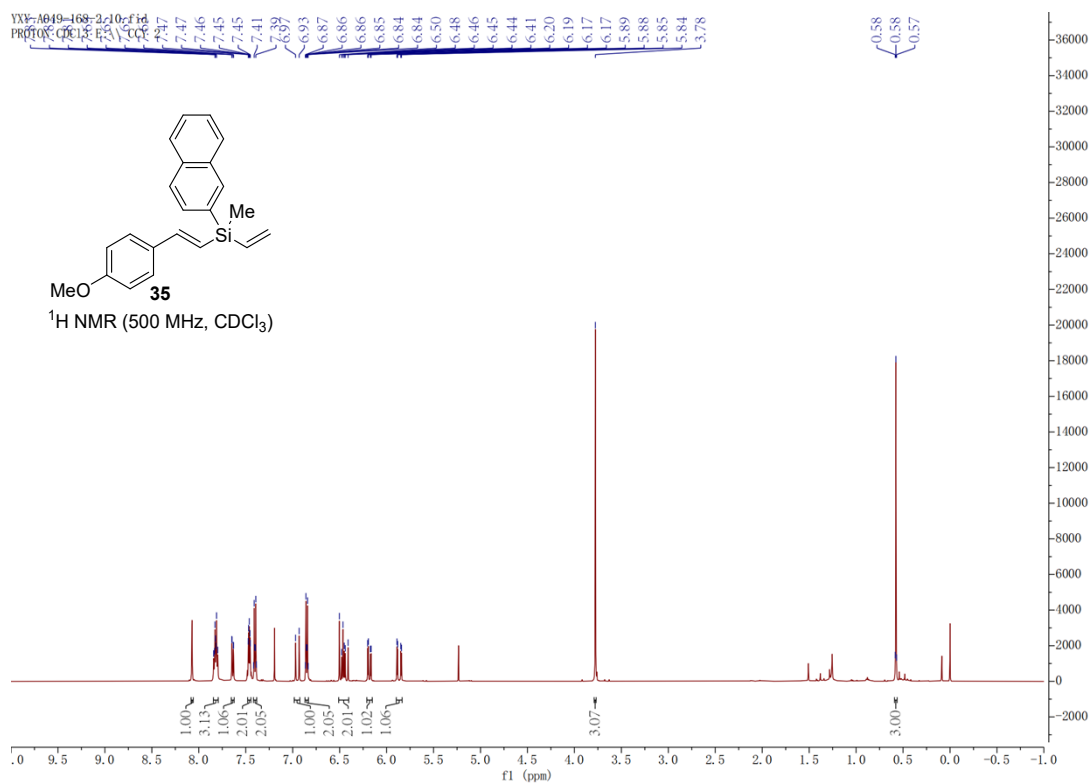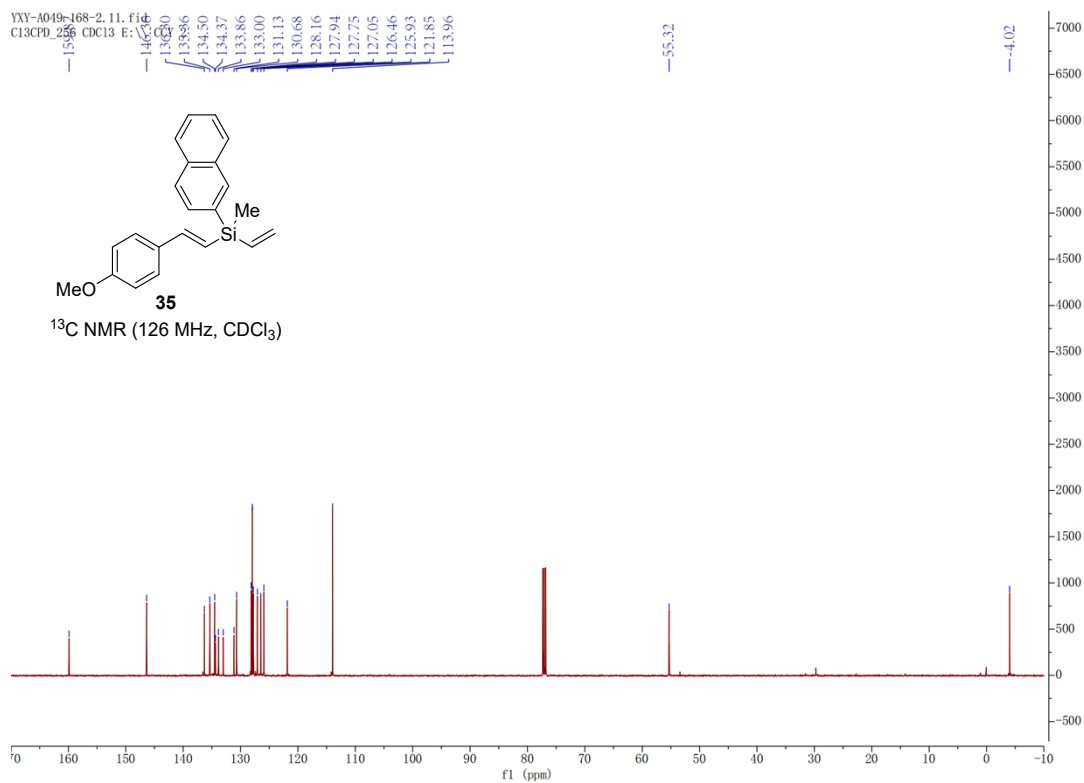

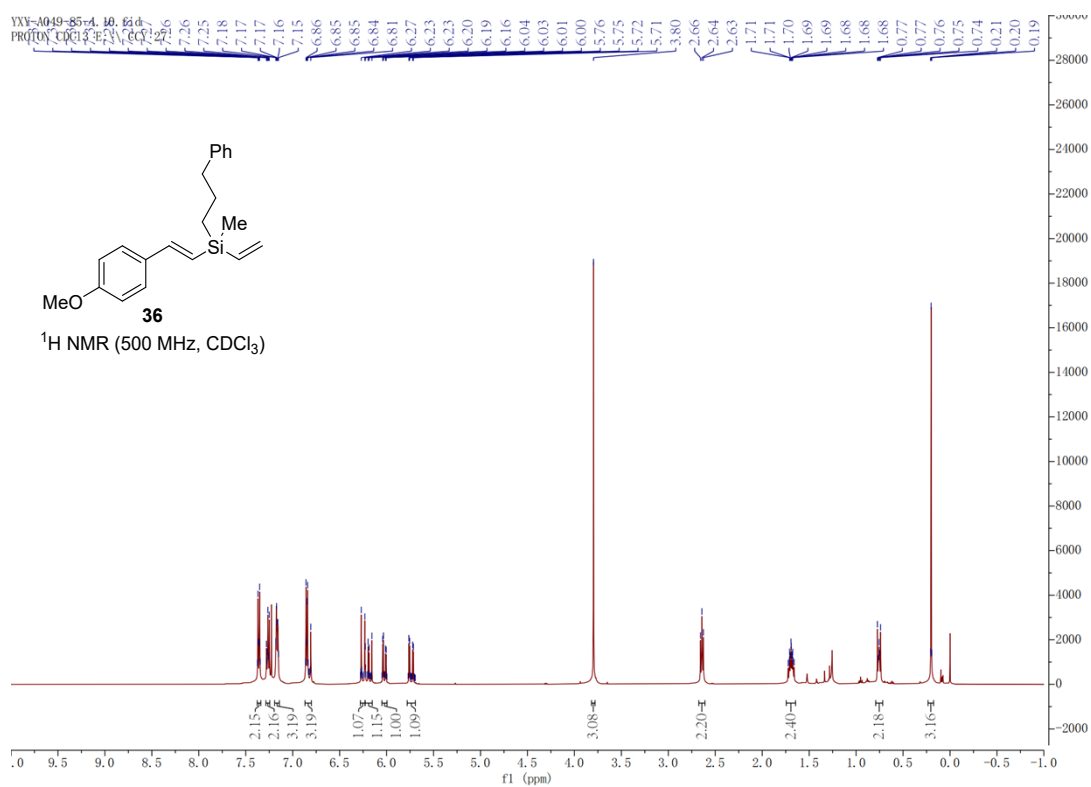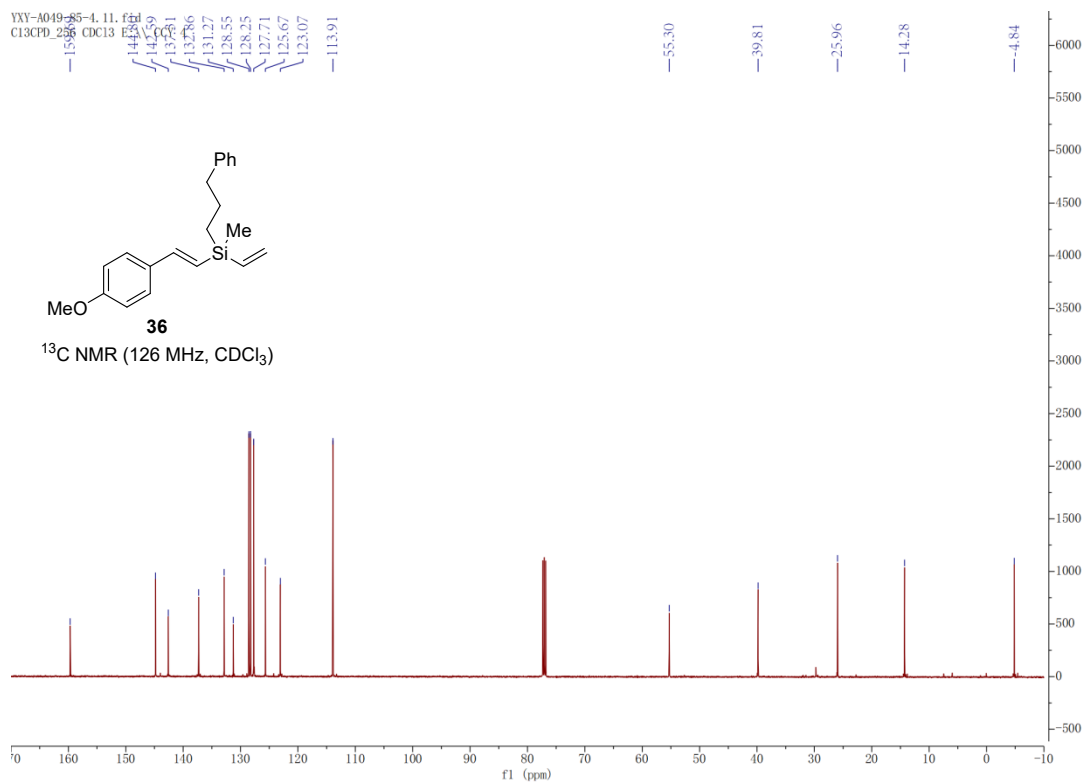



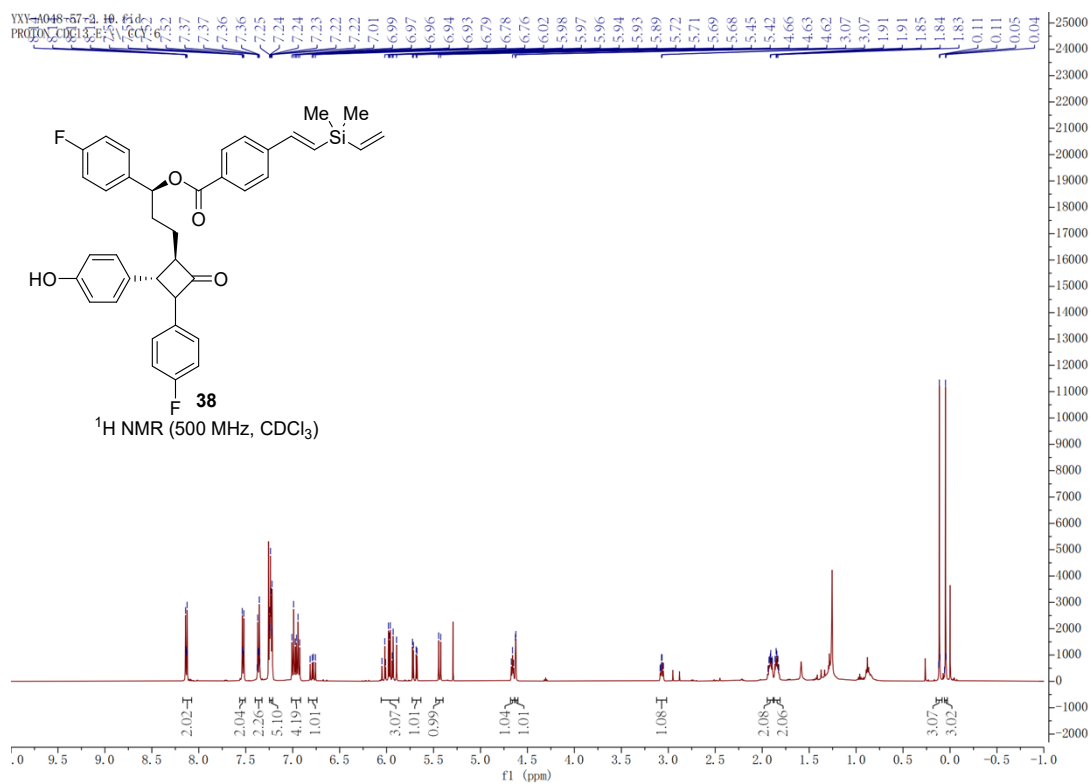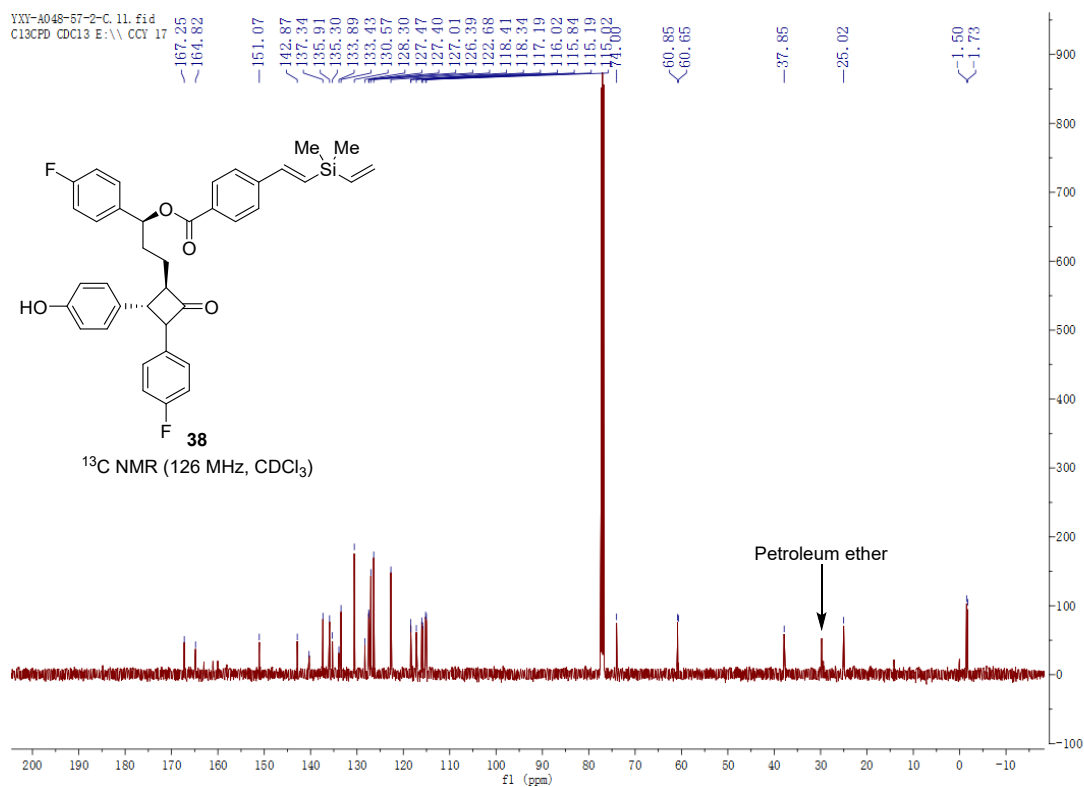

**38**

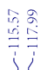







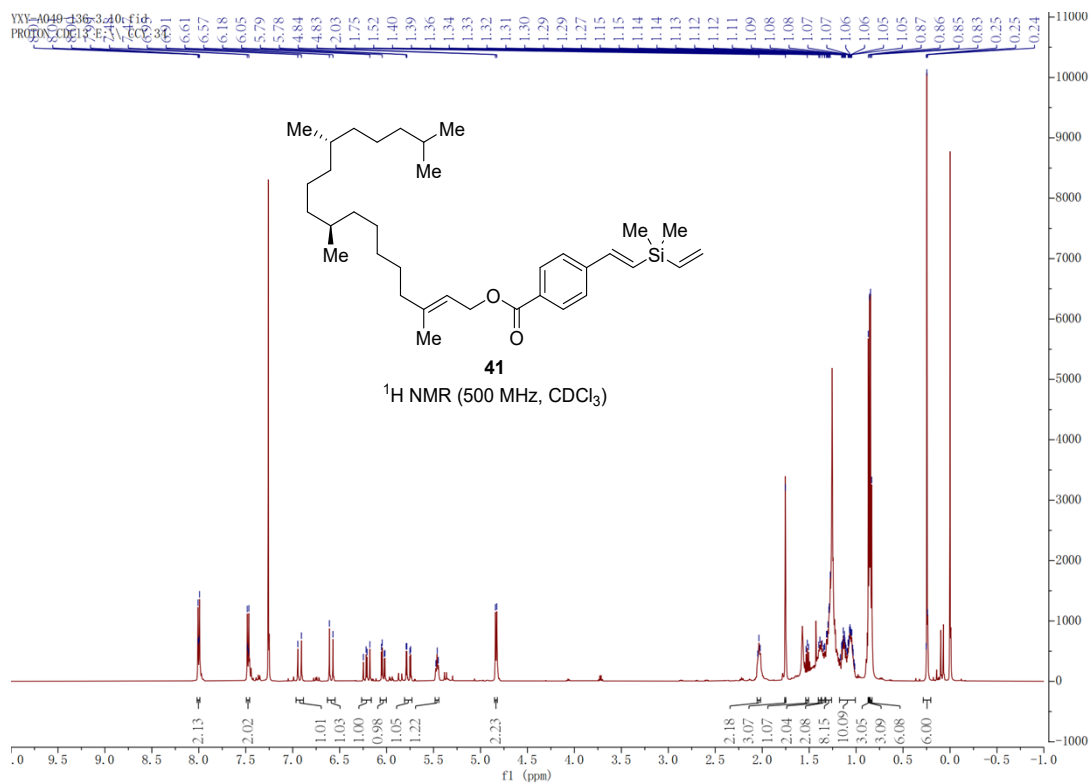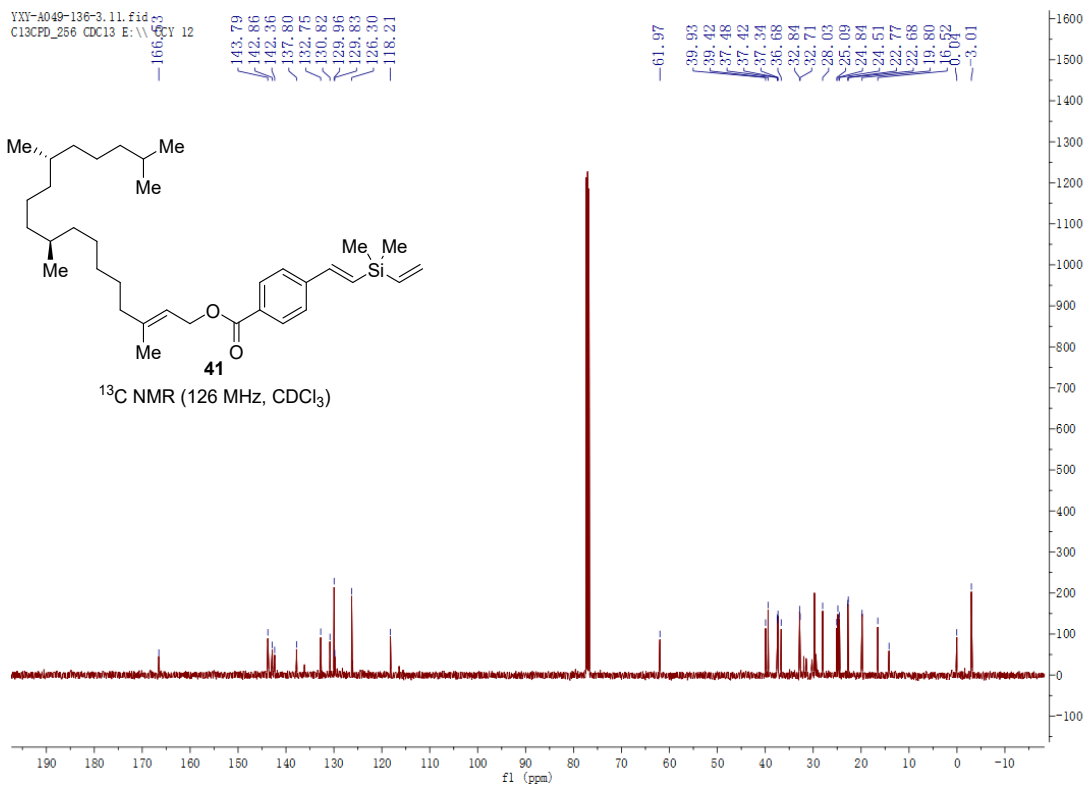



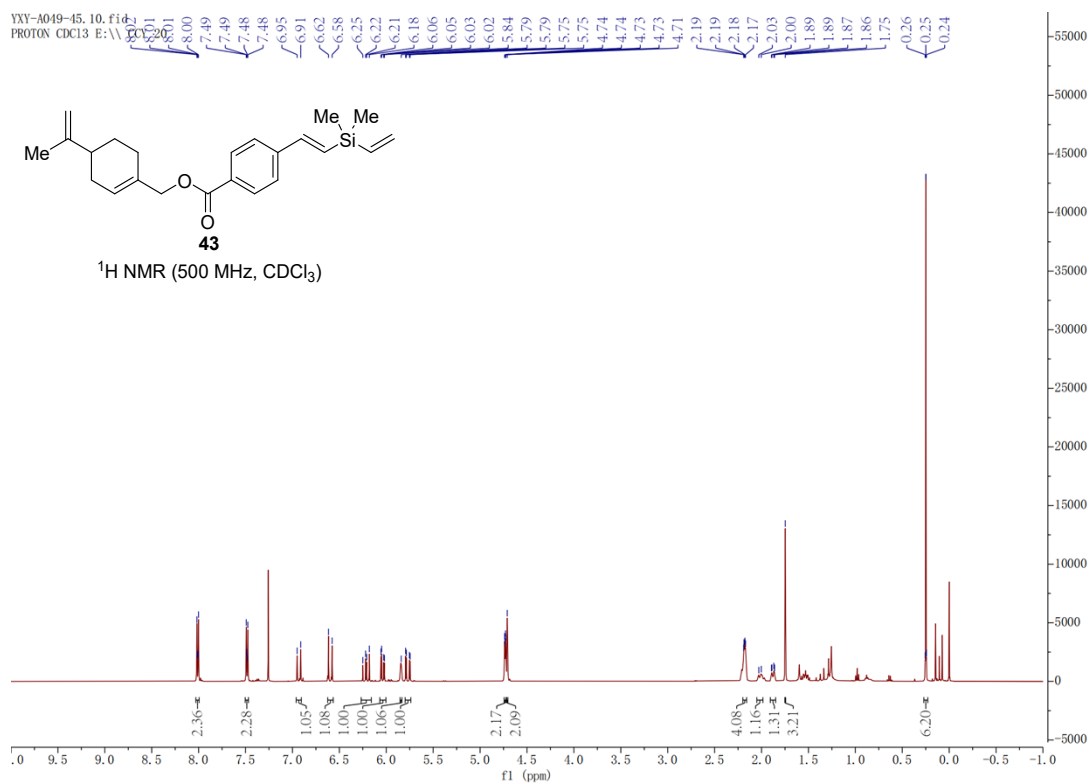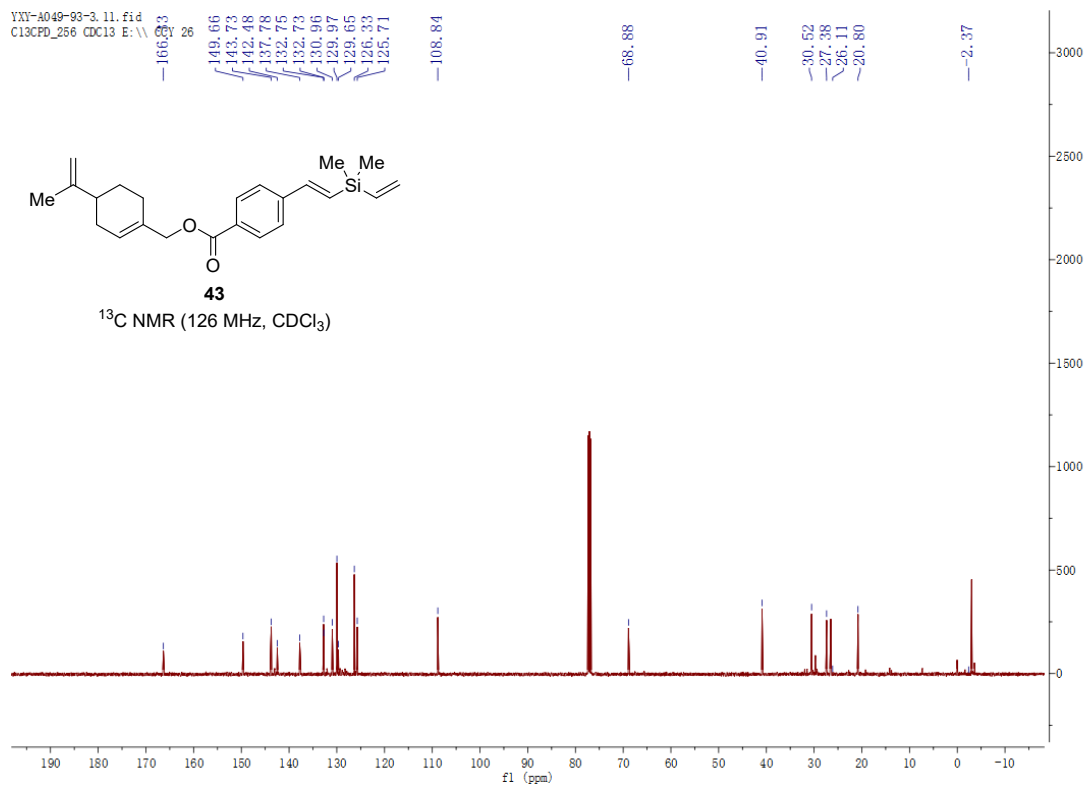



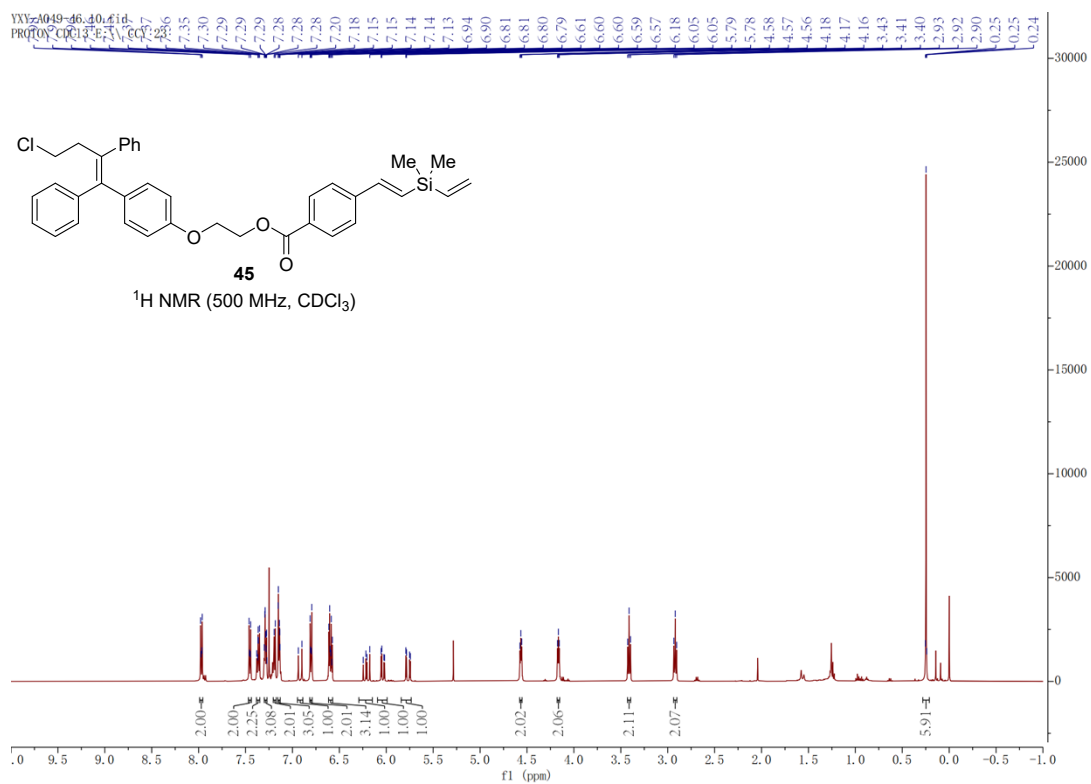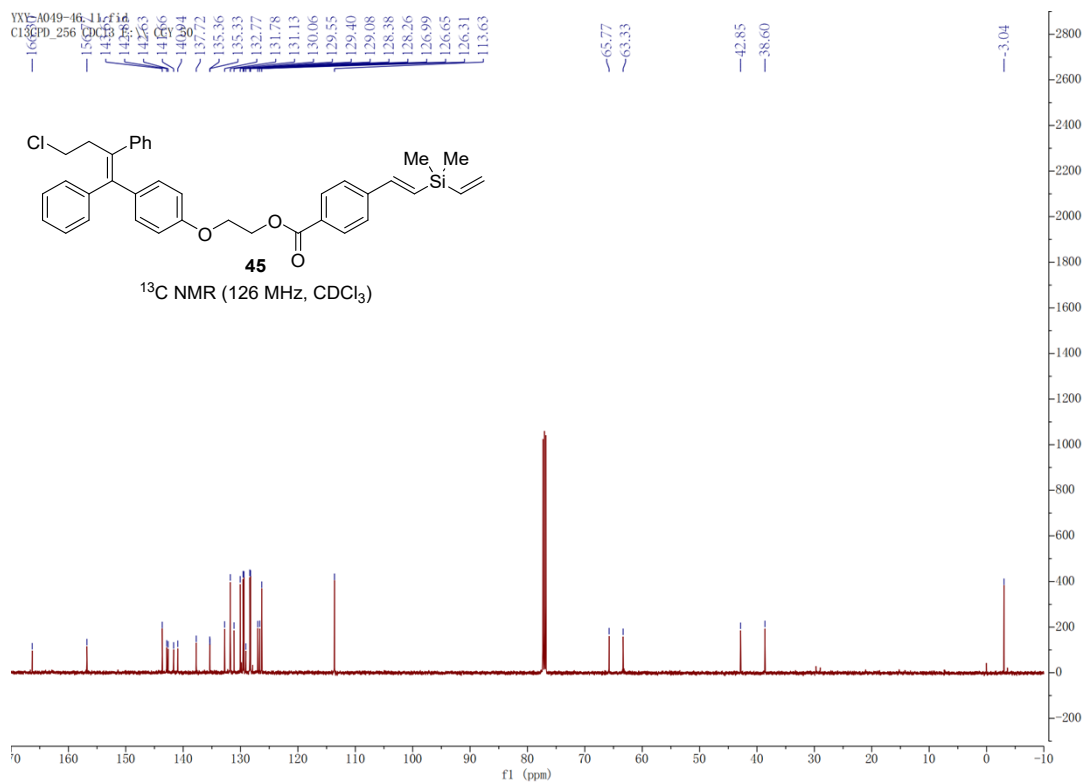

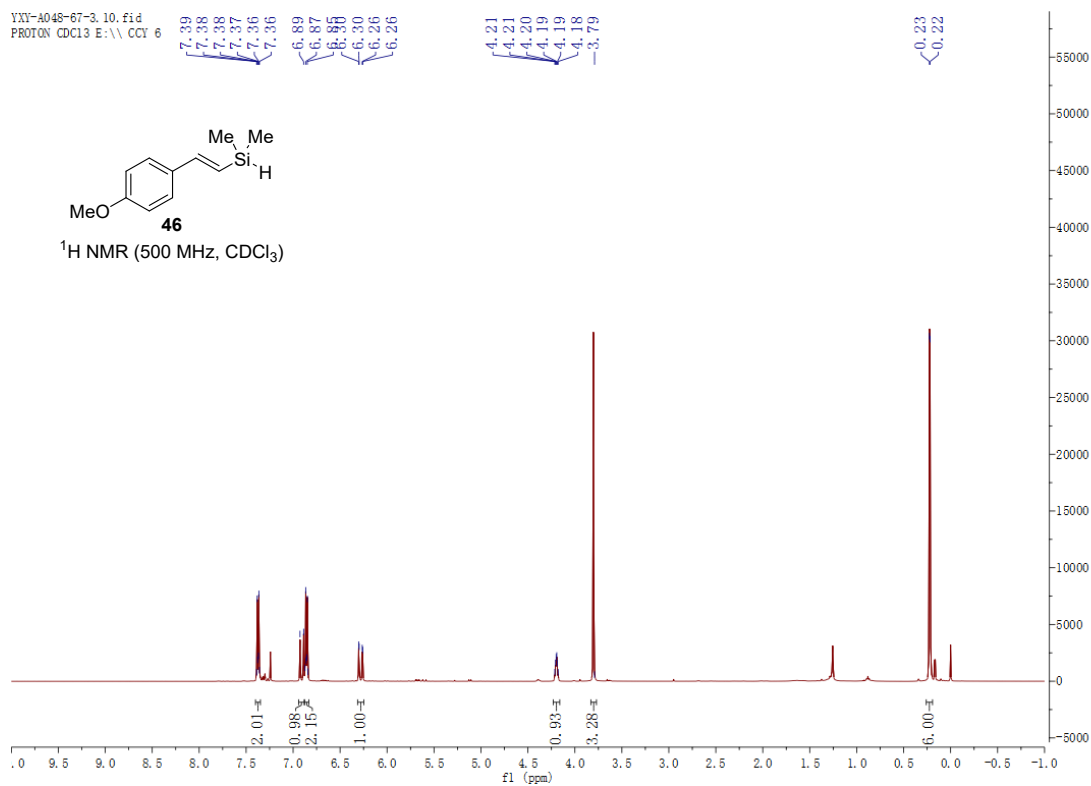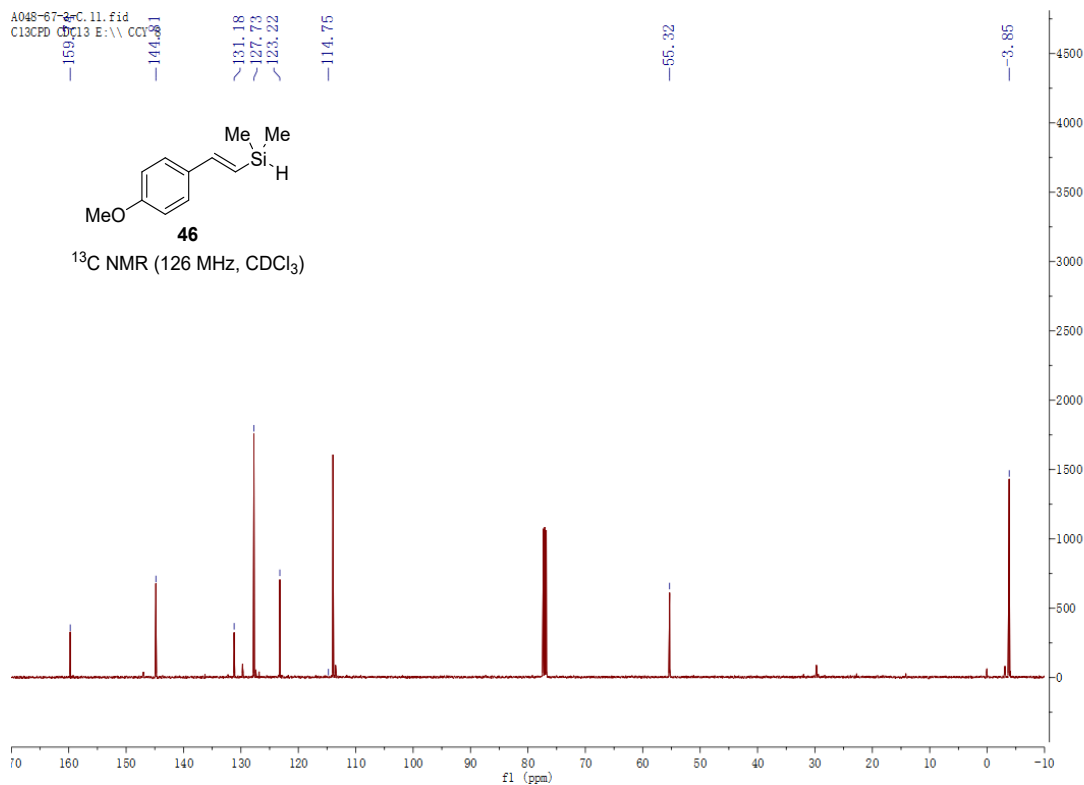



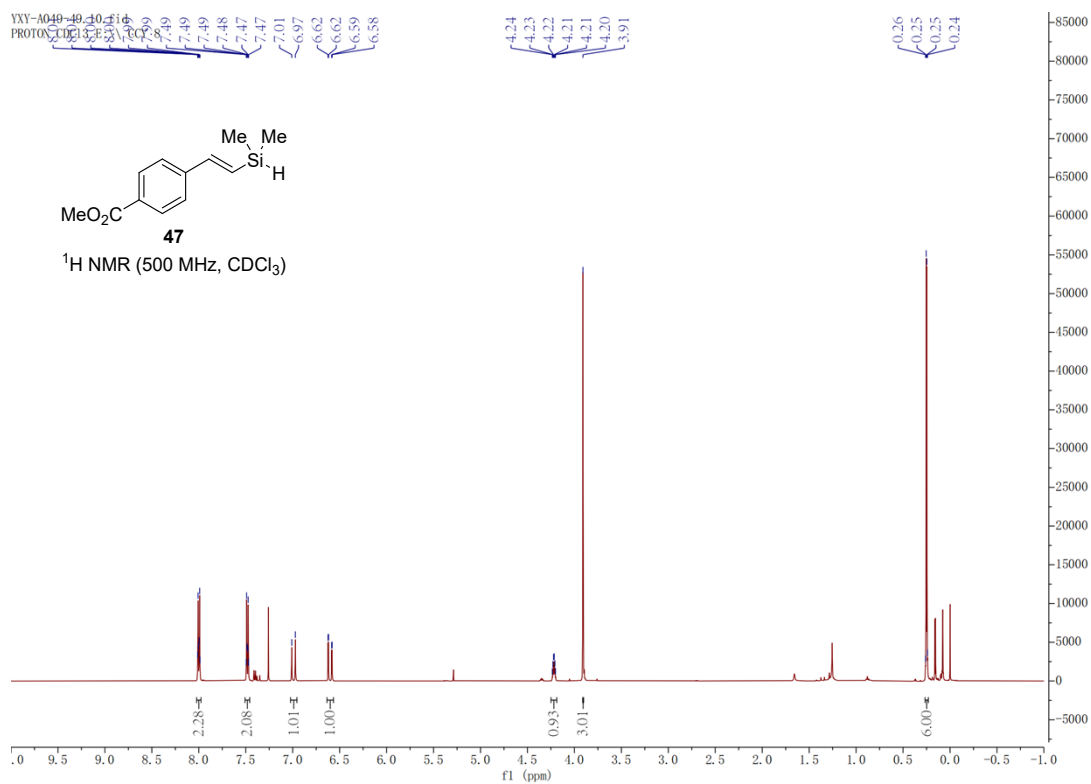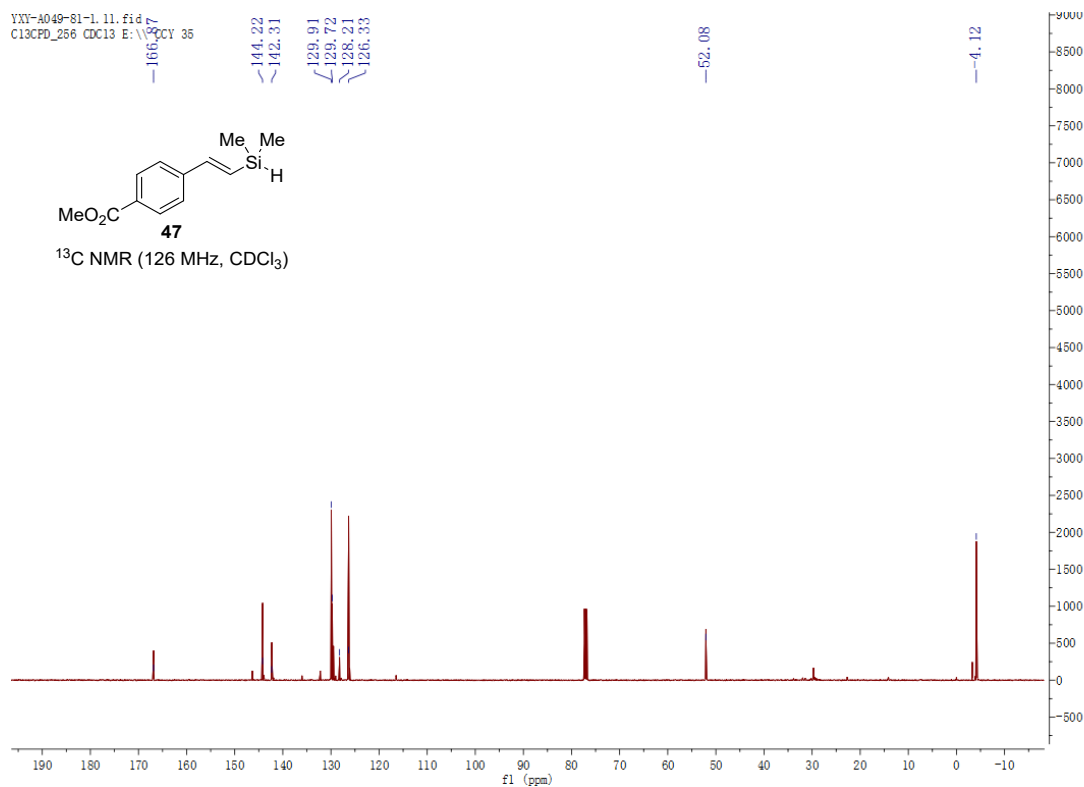

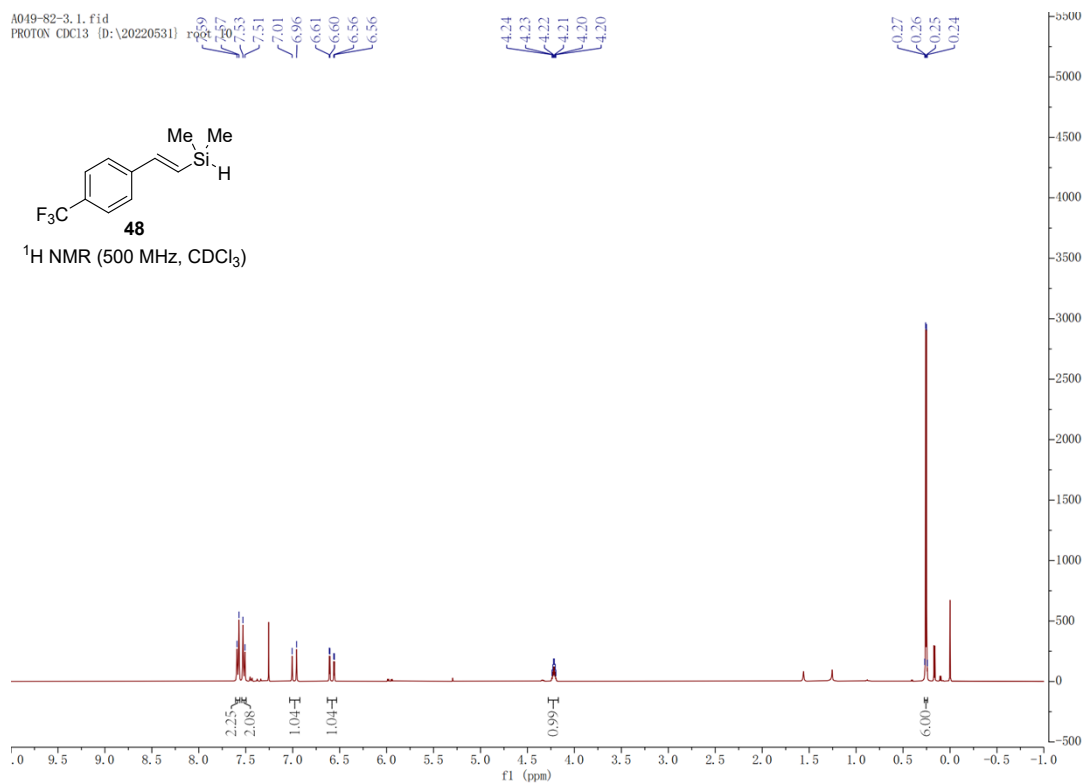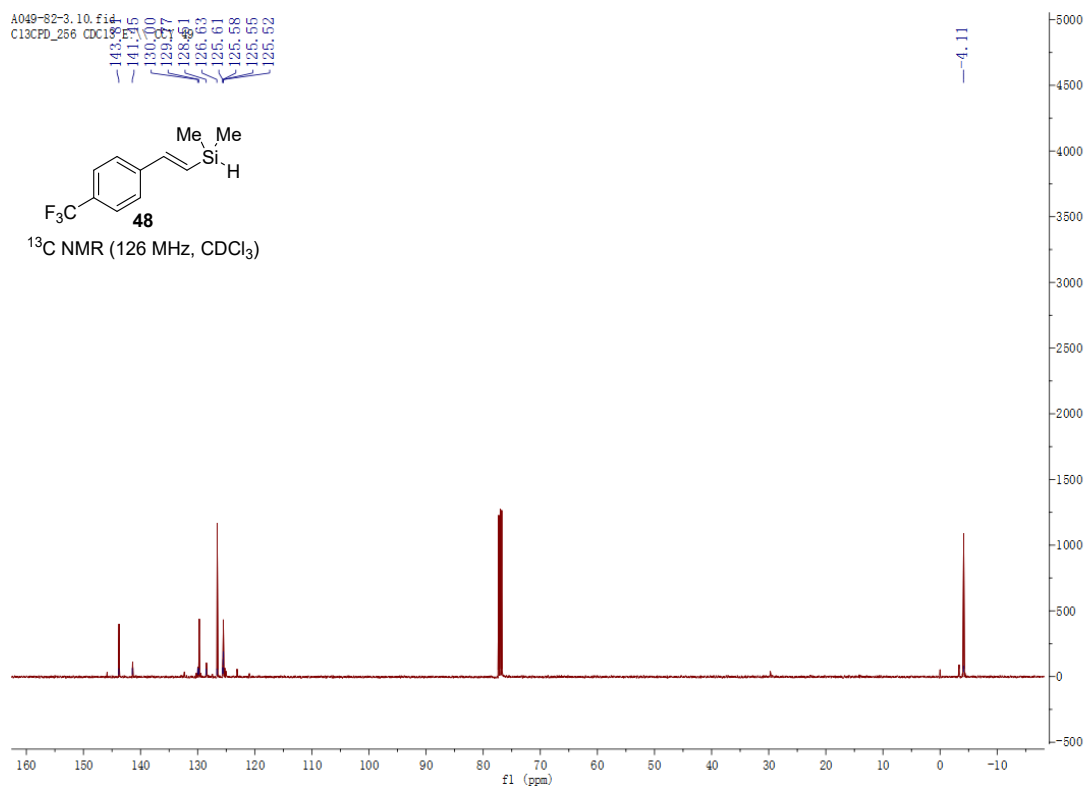

XXY-A049-48, 11.fid  
F19CPD CDCl3 E:\ CCY 3

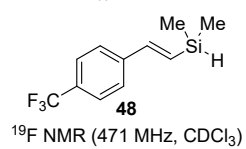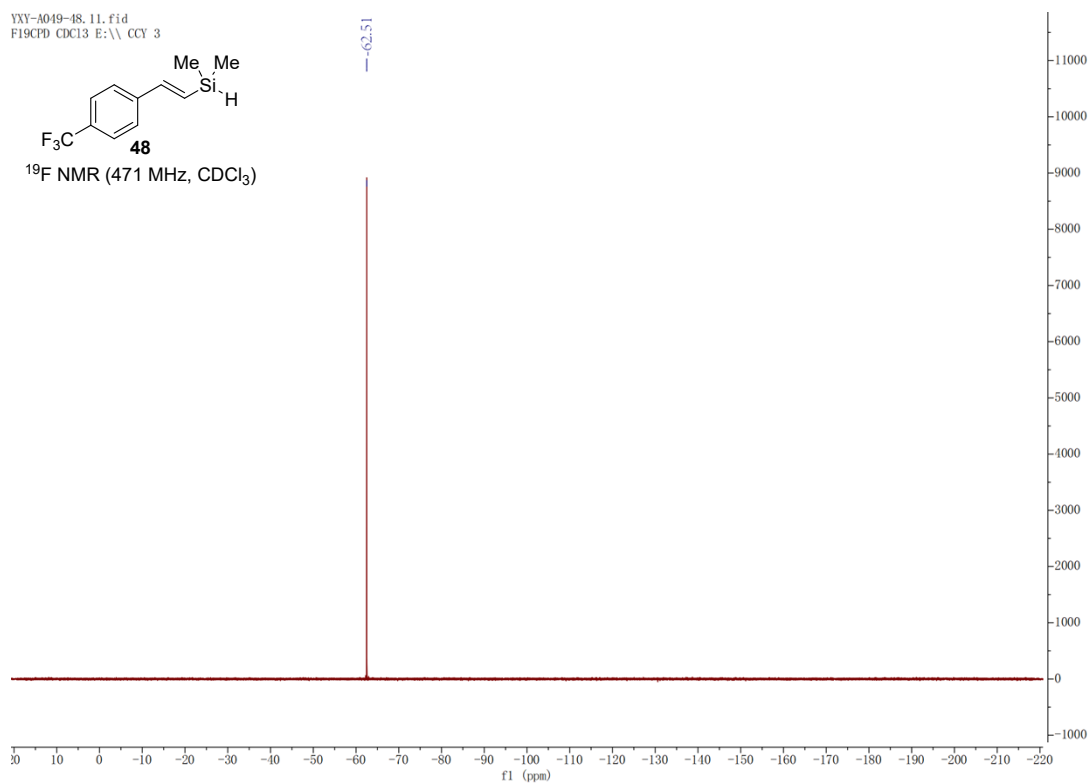

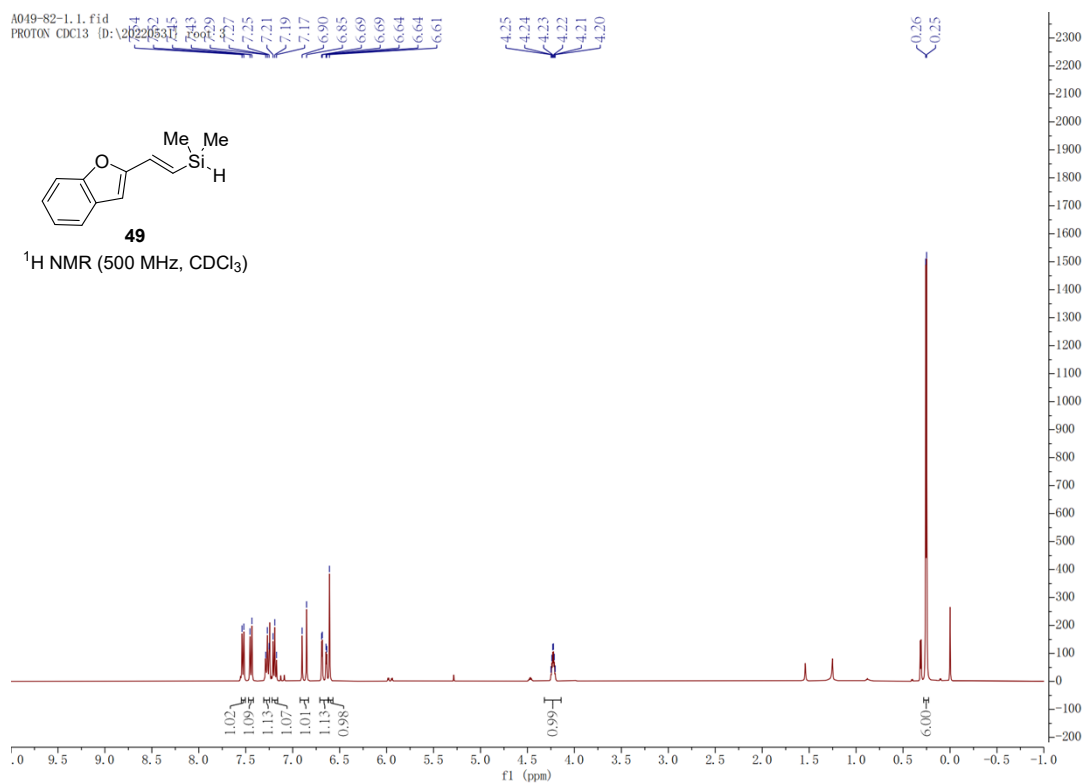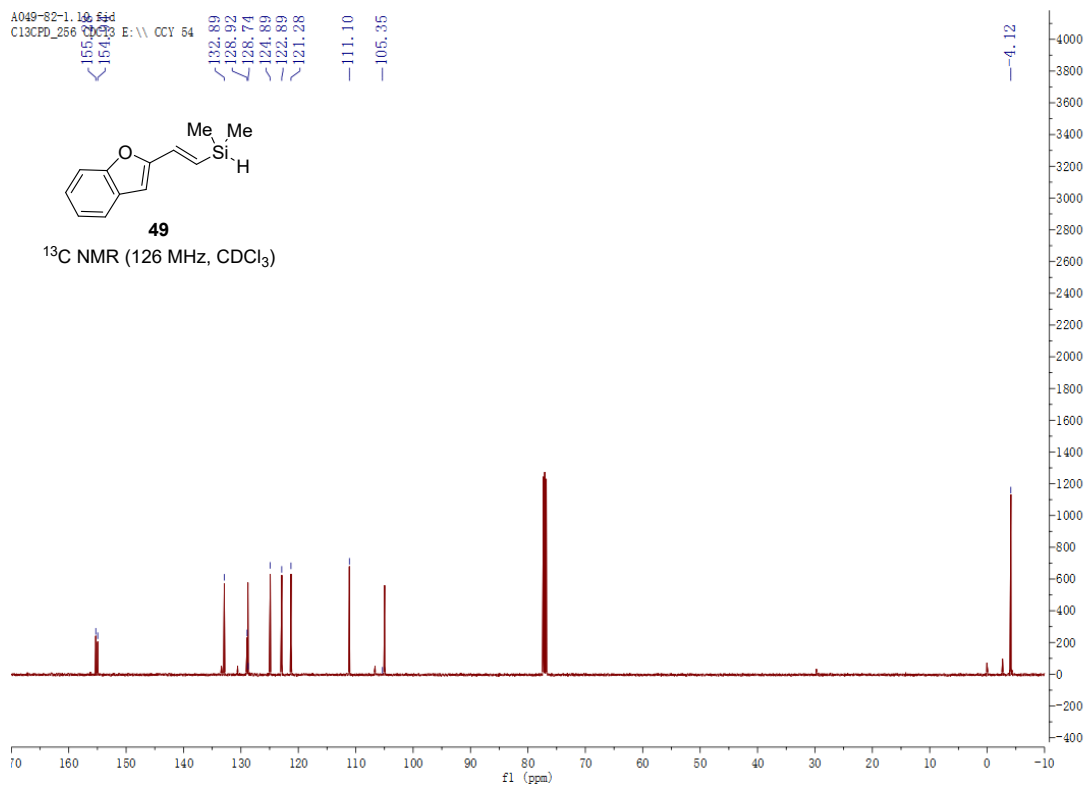

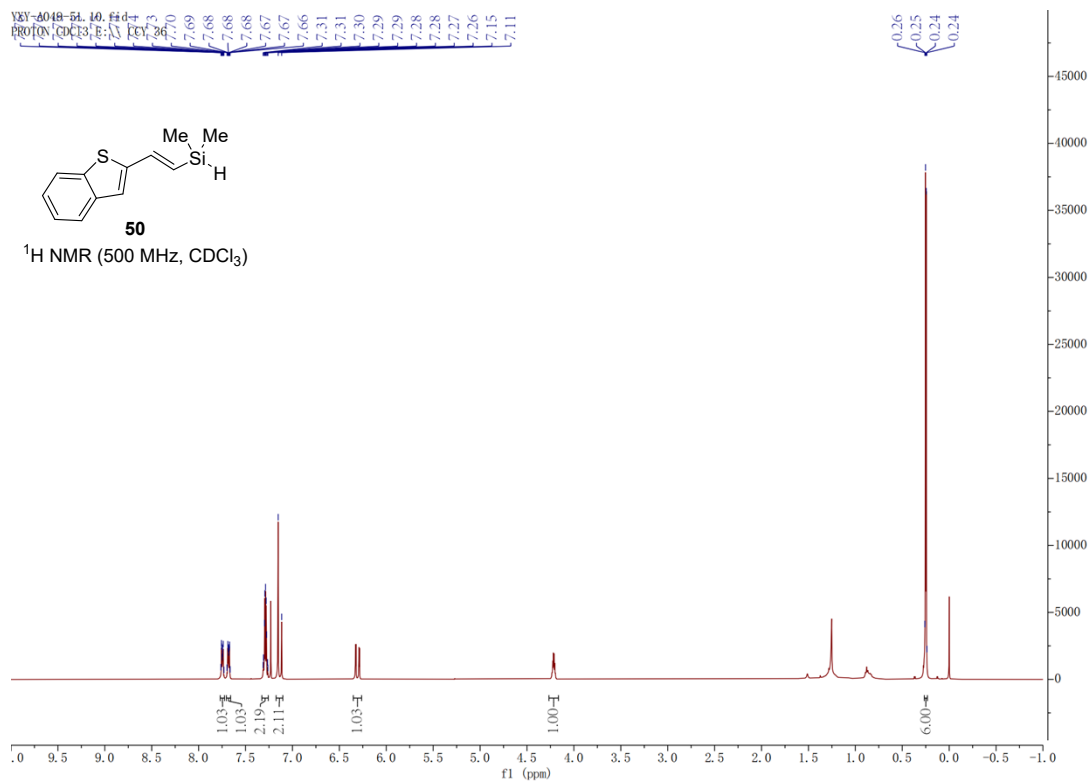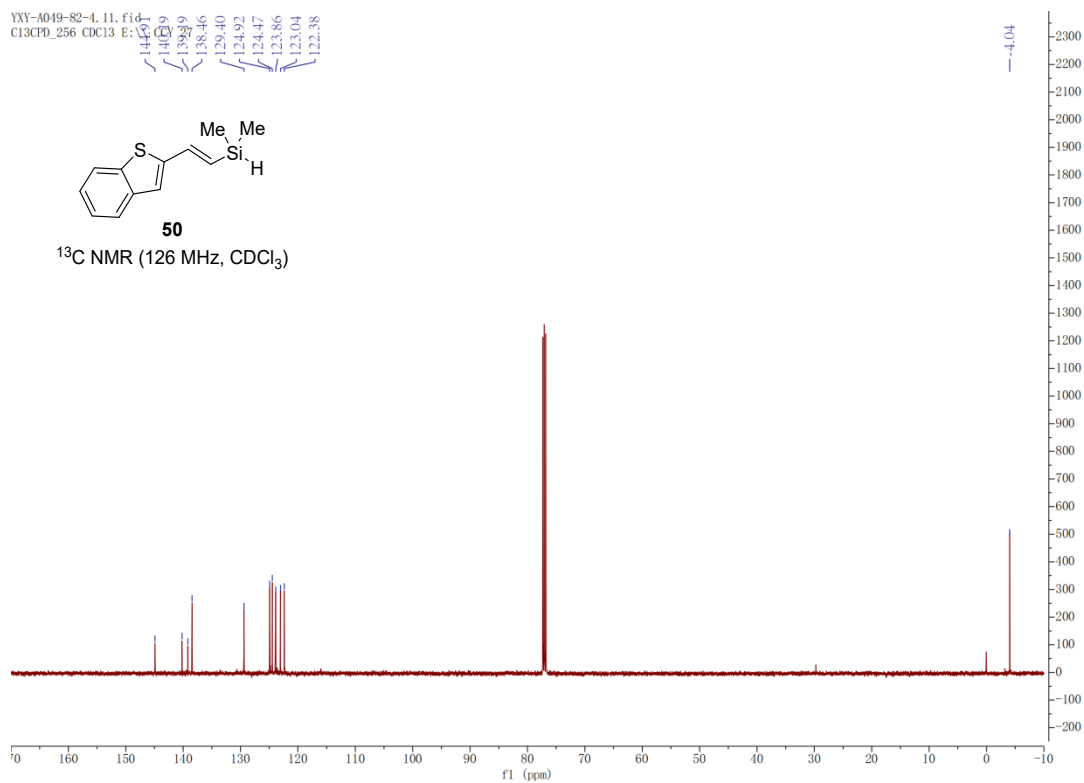

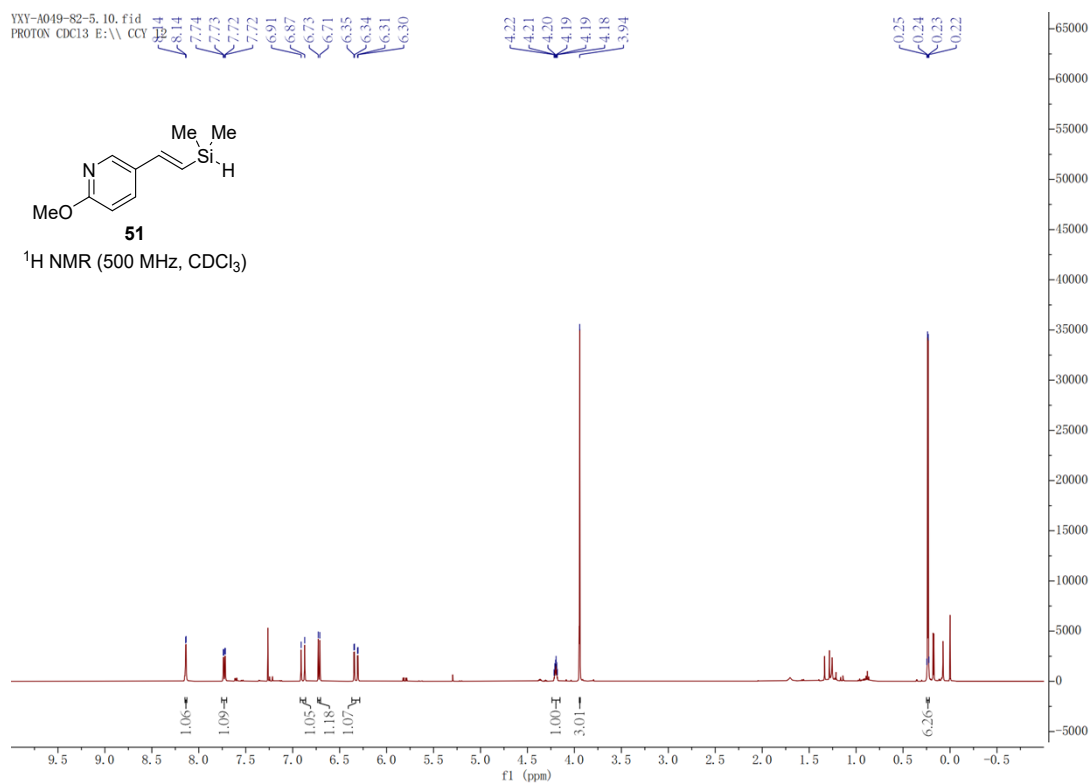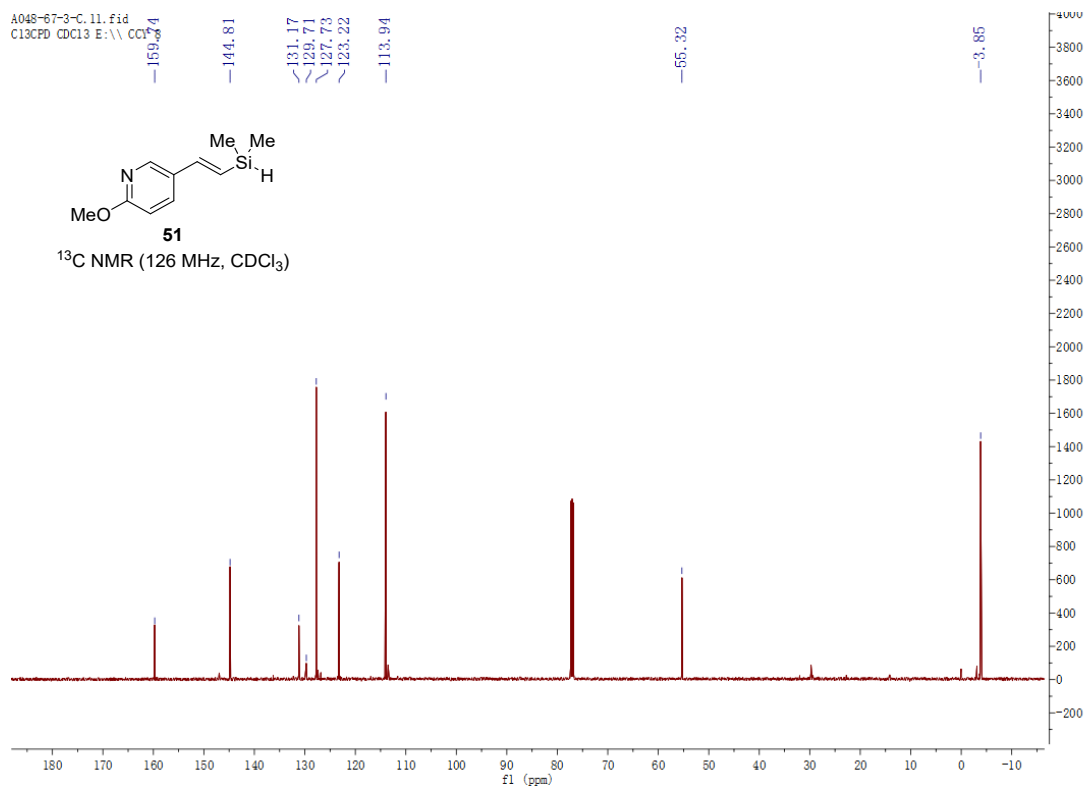

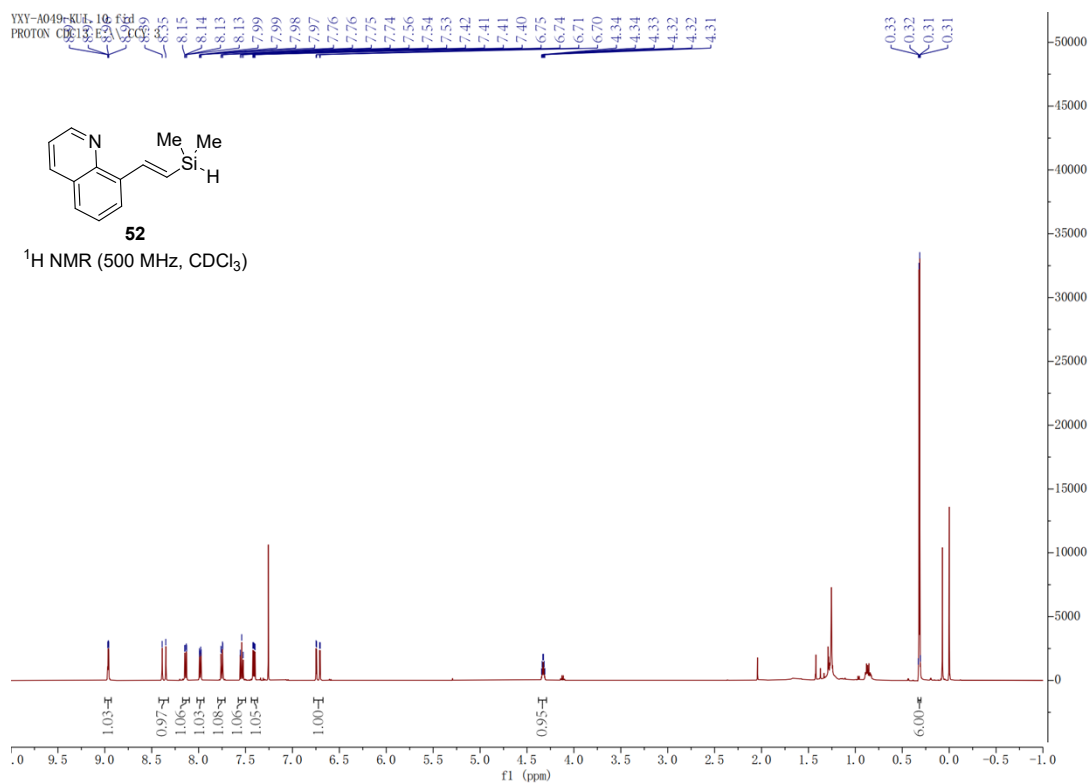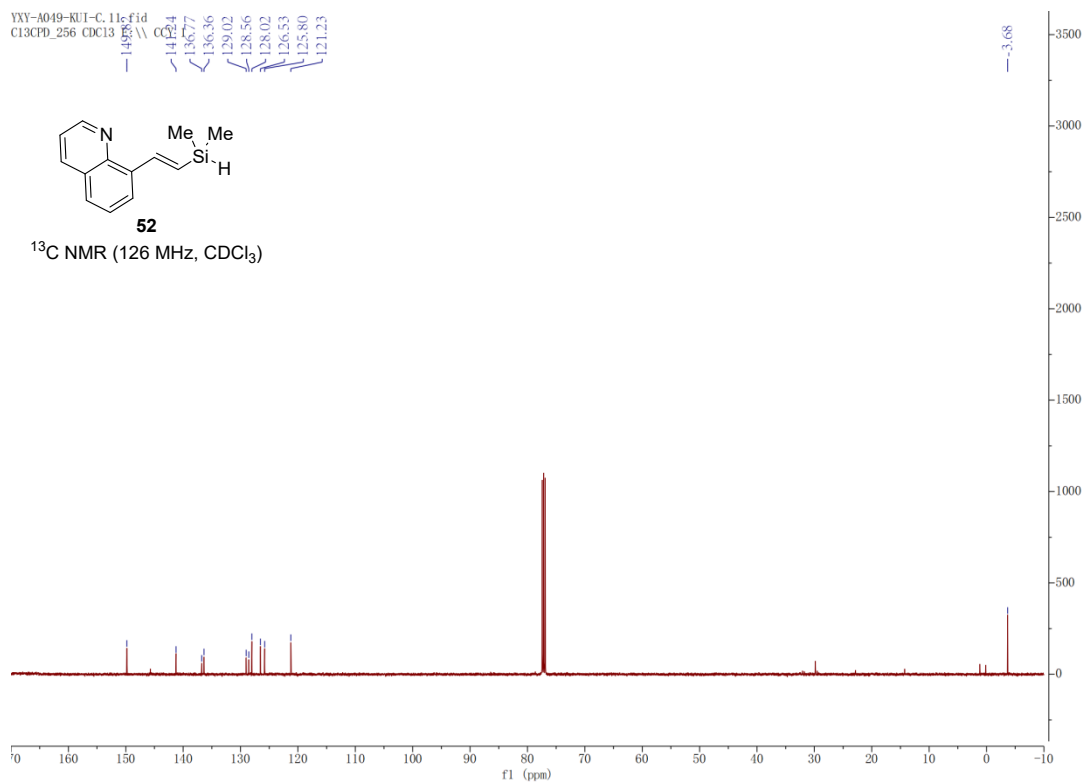

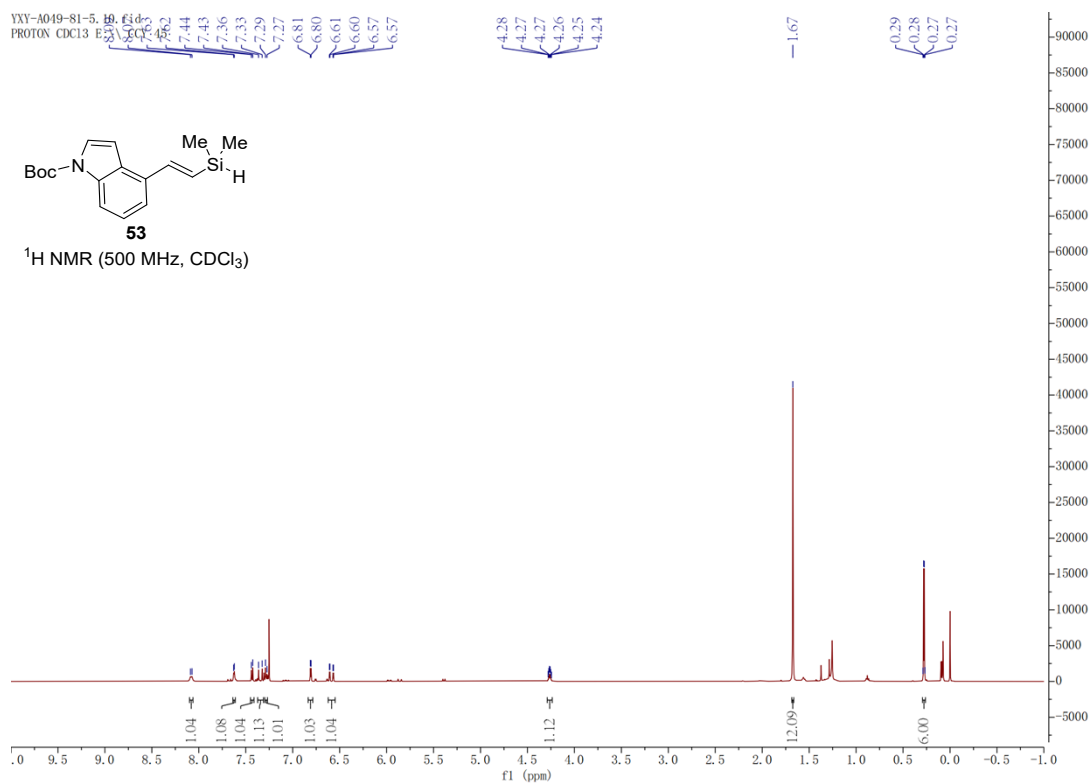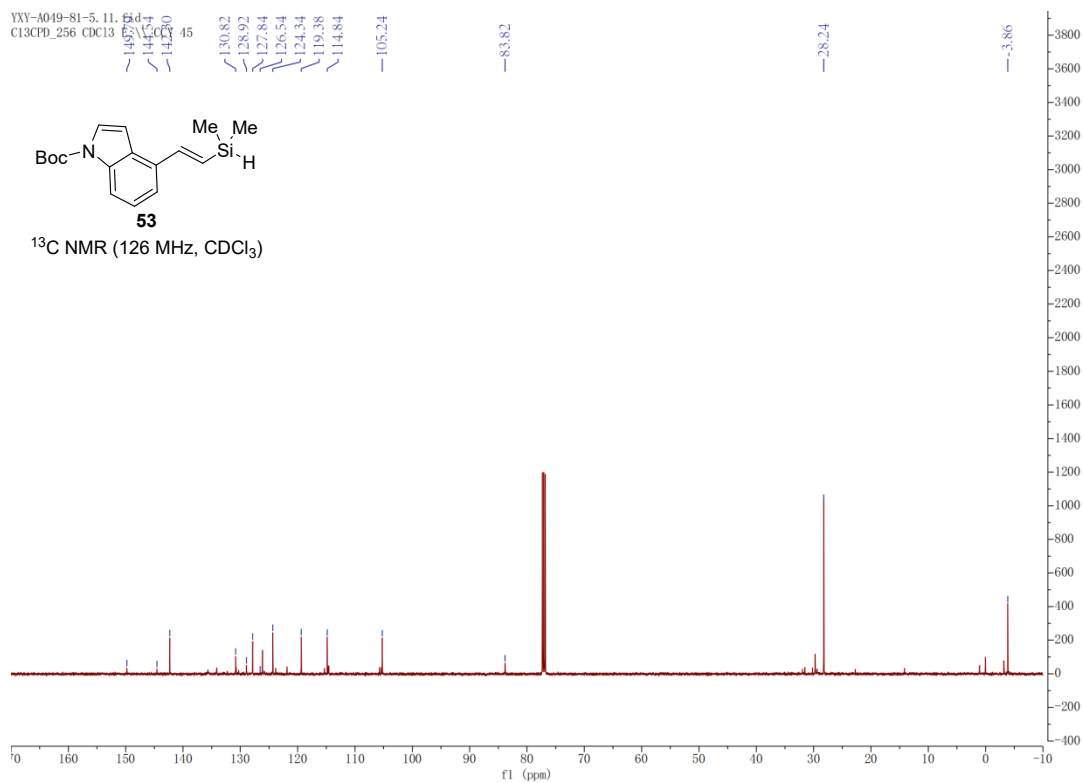









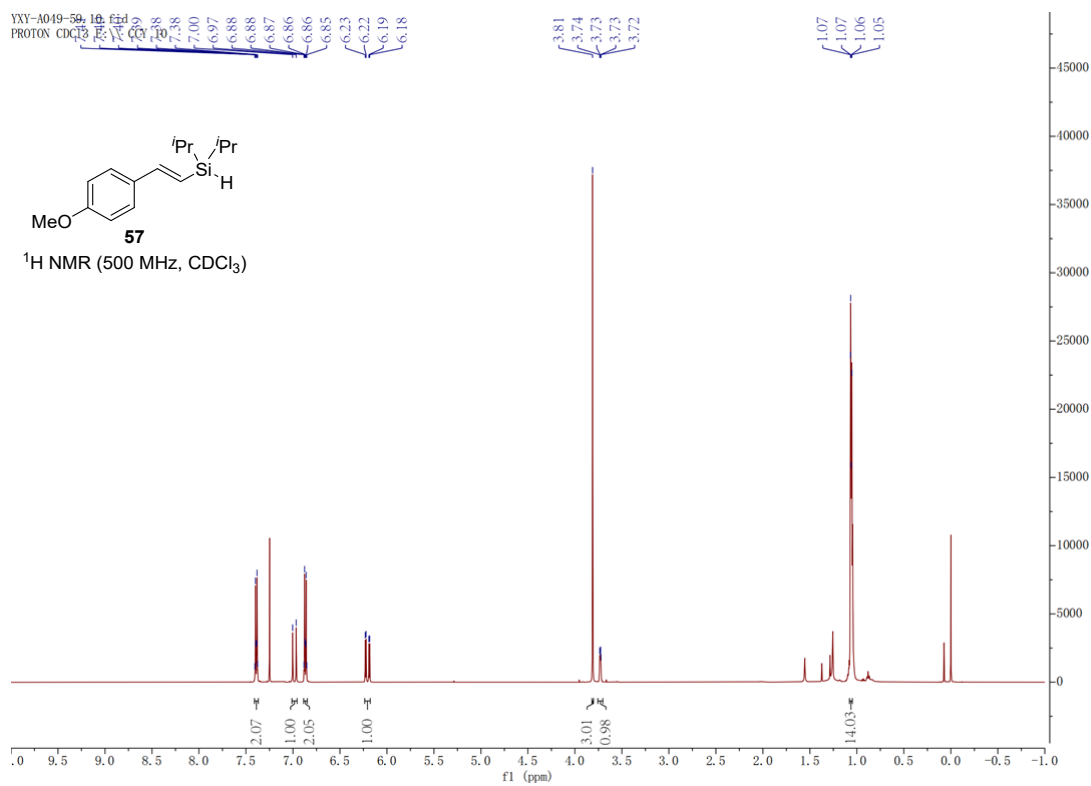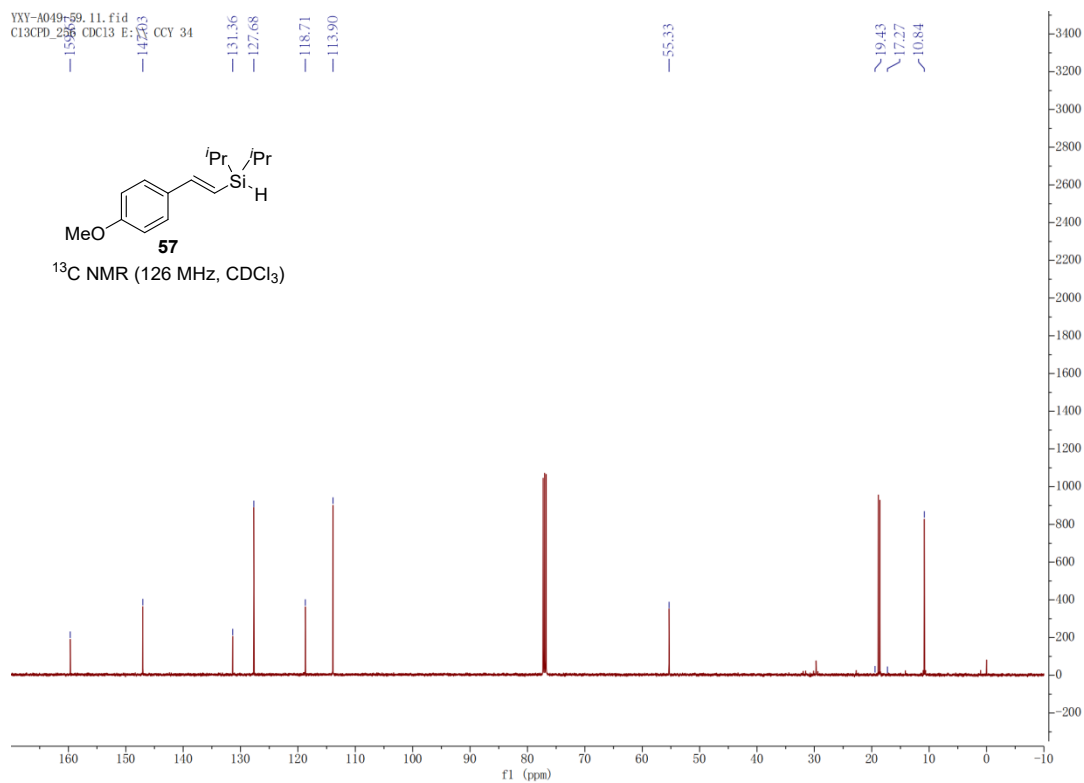

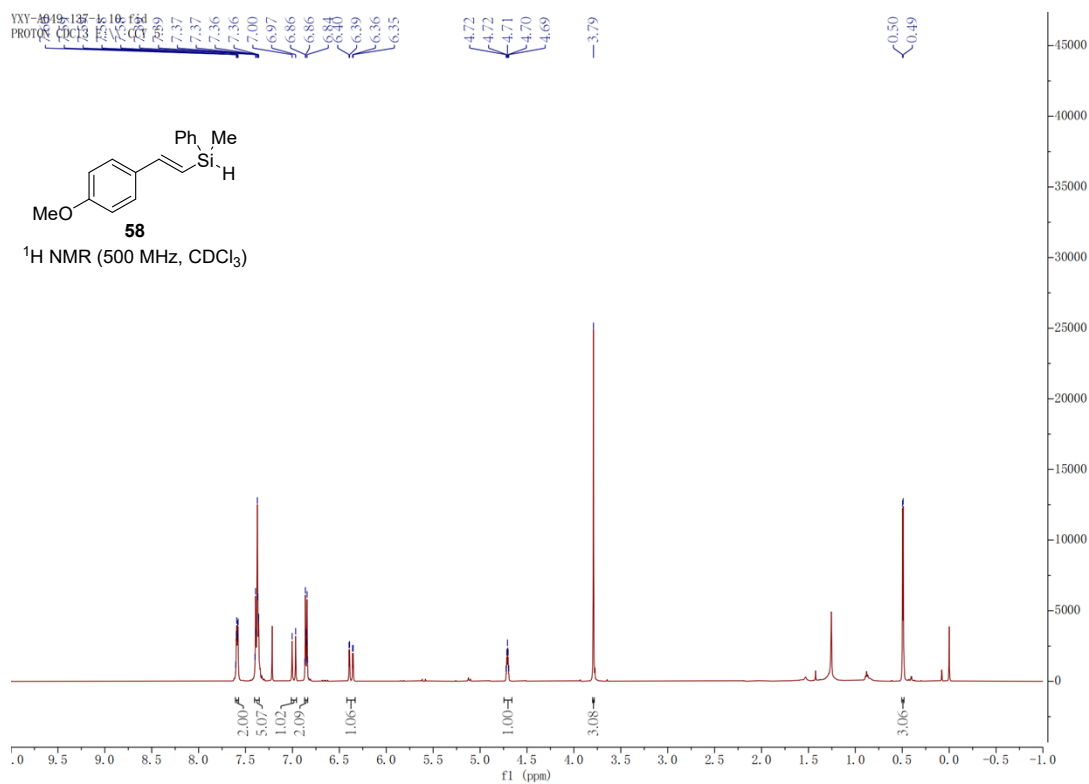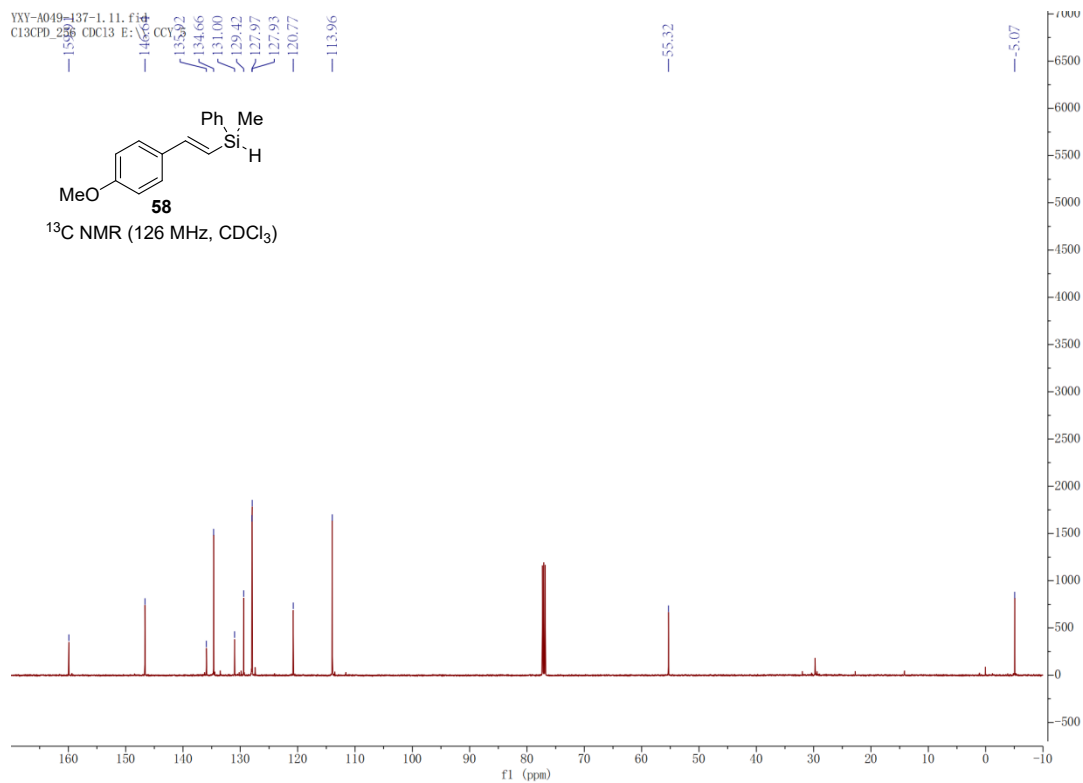

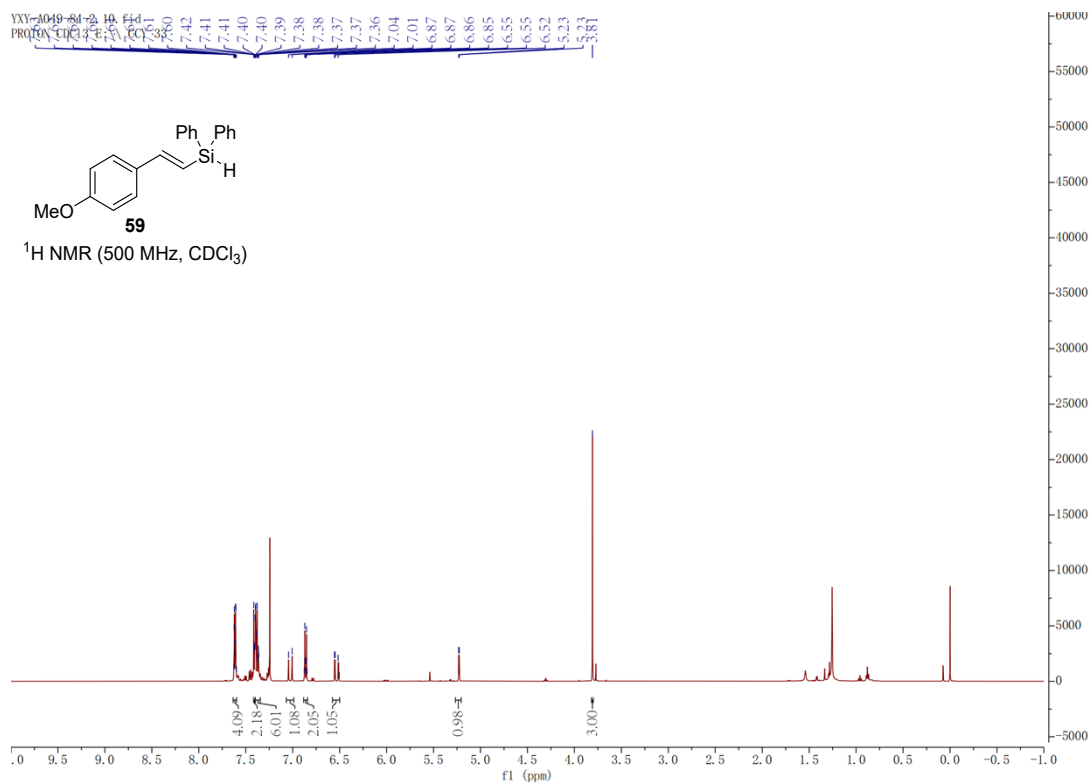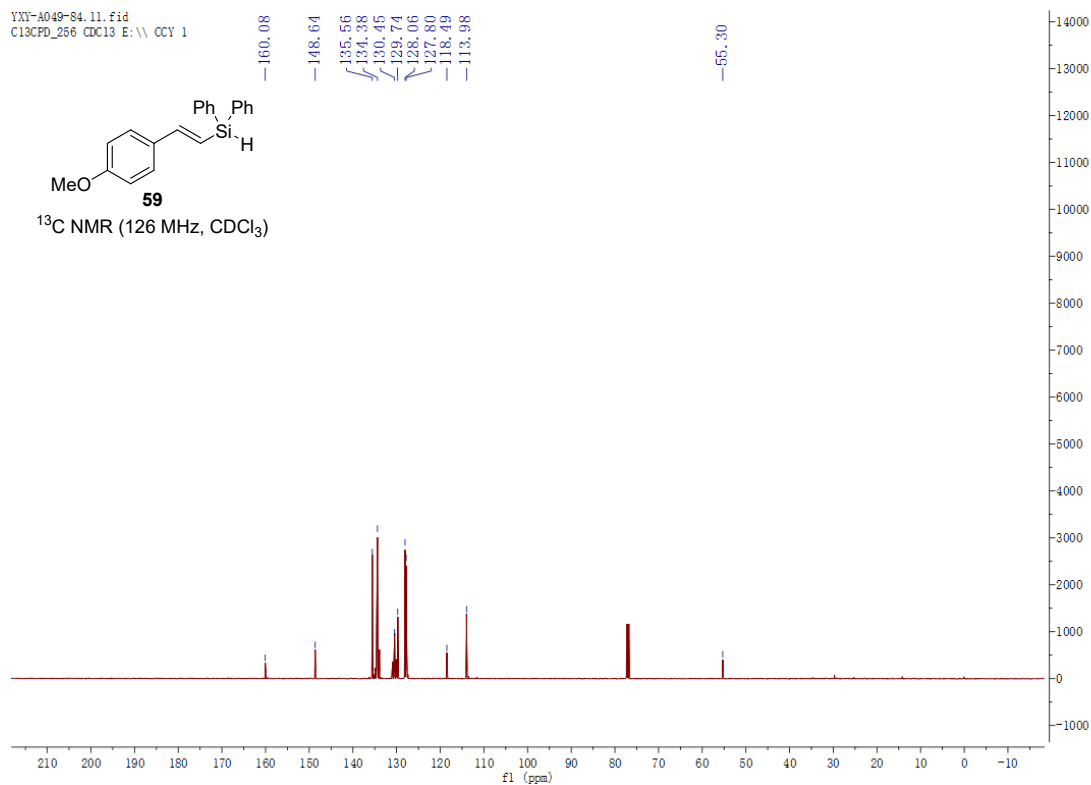

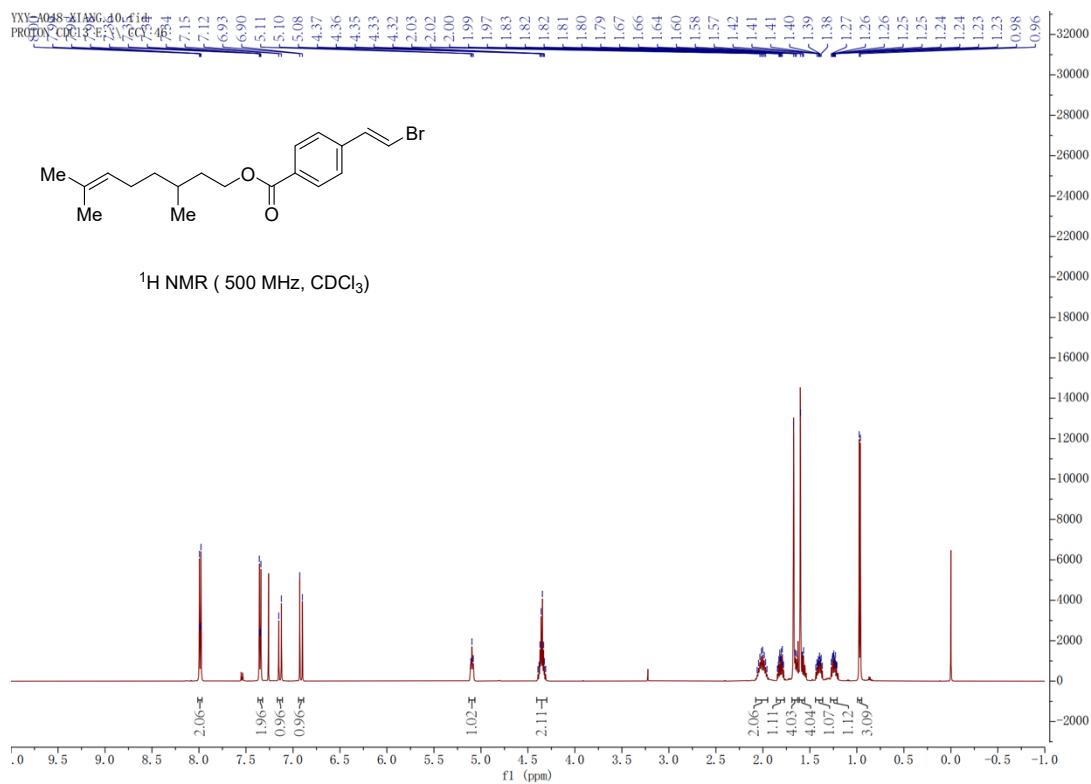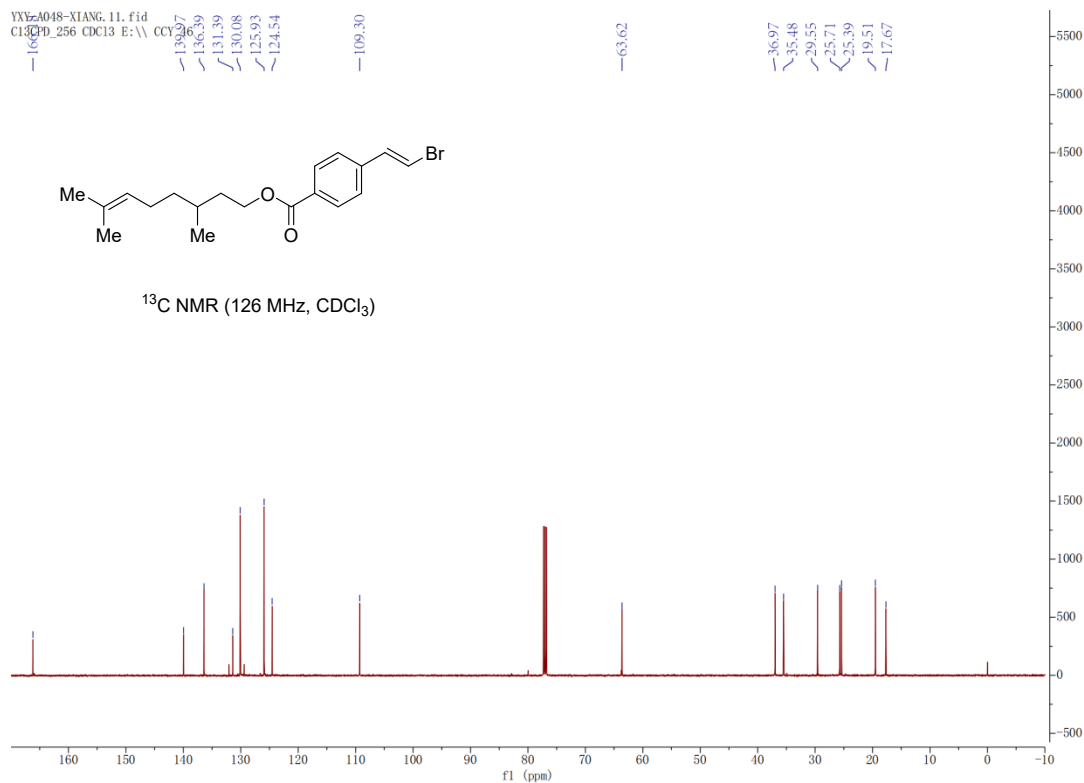

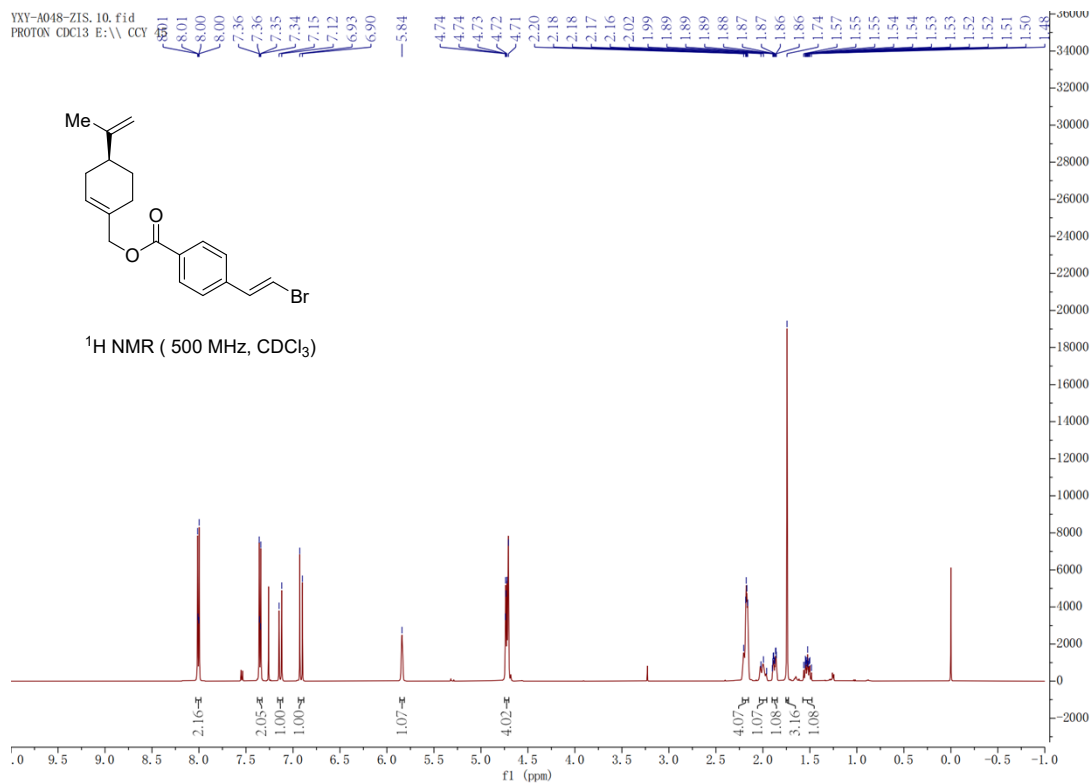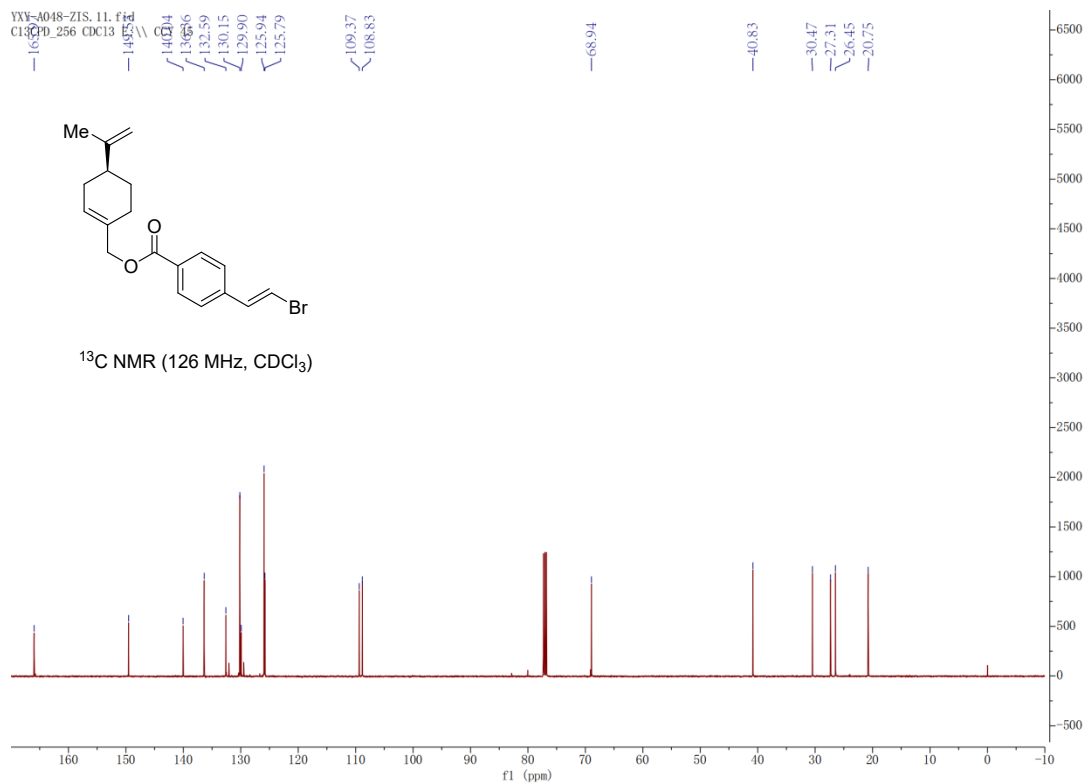



### **III. References**

- [1] Ye, Y.; Liu, J.; Xu, B.; Jiang, S.; Bai, R.; Li, S.; Xie, T.; Ye, X.-Y. *Chem. Sci.* **2021**, *12*, 13209.
- [2] Ye, Y.; Qi, X.; Xu, B.; Lin, Y.; Xiang, H.; Zou, L.; Ye, X.-Y.; Xie, T. *Chem. Sci.* **2022**, *13*, 6959.
- [3] Duan, J.-C.; Wang, K.; Xu, G.-L.; Kang, S.-L.; Qi, L.-L.; Liu, X.-Y.; Shu, X.-Z. *Angew. Chem. Int. Ed.* **2020**, *59*, 23083.
- [4] Zhao, Z.-Z.; Pang, X.-B.; Wei, X.-X.; Liu, X.-Y.; Shu, X.-Z. *Angew. Chem. Int. Ed.* **2022**, e202200215.
